# Supplementary material for: Visible-light-mediated synthesis of polysubstituted pyrroles via CAr–I reduction triggered 1,5-hydrogen atom transfer process
Source: Royal Society of Chemistry journal article supplement (doi:10.1039/d4qo00953c), 2024-01-01

## Supplementary Information

For

# Visible-Light-Mediated Synthesis of Polysubstituted Pyrroles via C<sub>Ar</sub>-I Reduction Triggered 1,5-Hydrogen Atom Transfer Process

Junlei Wang<sup>a, †, \*</sup>, Qinglin Xie<sup>a, †</sup>, Guocheng Gao<sup>a, †</sup>, Guofen Wei<sup>a</sup>, Xinxin Wei<sup>a</sup>, Xuemei Chen<sup>a</sup>, Daohai Zhang<sup>a, \*</sup>, Hongqing Li<sup>a</sup>, Binbin Huang<sup>b, \*</sup>

<sup>a</sup> School of Chemical Engineering, Guizhou Minzu University, Guiyang 550025, China.

*E-mail:* junleiwang@gzmu.edu.cn; zhangdaohai6235@163.com

<sup>b</sup> Faculty of Arts and Sciences, Beijing Normal University, Zhuhai 519087, China.

*E-mail:* binbinhuang@bnu.edu.cn.

## Contents

|    |                                                              |     |
|----|--------------------------------------------------------------|-----|
| 1  | General Information                                          | S1  |
| 2  | Optimization Studies                                         | S2  |
| 3  | General Procedure for the Reactions                          | S5  |
| 4  | General procedure for the synthesis of substrates.           | S6  |
| 5  | Product Characterization                                     | S7  |
| 6  | Synthetic Applications                                       | S18 |
| 7  | Mechanistic studies                                          | S24 |
| 8  | Reference                                                    | S27 |
| 9  | The crystallographic data                                    | S28 |
| 10 | Spectra for Substrates and Products Product Characterization | S29 |

## 1. General Information

All of reactions were performed under an ambient temperature, magnetically stirred, and monitored by thin-layer chromatography (TLC) using Qingdao Puke Separation Materials Co., Ltd TLC plates pre-coated with 250 um thickness silica gel 60 F254 plates and visualized by fluorescence quenching under UV light. All of the manipulations were carried out using oven-dried glassware, including standard Schlenk techniques. All of the reagents were purchased from Alfa, Energy-Chemical or Sigma-Aldrich and used without further purification. Solvents were purified according to the method of Grubbs.  $^1\text{H}$  NMR,  $^{13}\text{C}$  NMR were recorded on a Bruker AV-400 ( $^1\text{H}$  NMR at 400 MHz,  $^{13}\text{C}$  NMR at 100 MHz,  $^{19}\text{F}$  NMR at 376 MHz) spectrometers using tetramethylsilane (TMS) as internal standard.  $^1\text{H}$  and  $^{19}\text{F}$  multiplicities are indicated as follows: singlet (s), doublet (d), triplet (t), doublet of doublets (dd), quartet (q), multiplet (m), and broad resonance (br). Chemical shifts were calibrated using residual undeuterated solvent as an internal reference ( $\text{CDCl}_3$ : 7.26 ppm  $^1\text{H}$  NMR, 77.16 ppm  $^{13}\text{C}$  NMR). High resolution massspectra (HRMS) were collected on Bruker Esquire LC mass spectrometer using electrospray ionization. Flash column chromatography was carried out on silica gel (particle size 300-400 mesh) and eluted with petroleum/ethyl acetate.

## 2. Optimization Studies

**Table S1.** Photocatalyst Screening.<sup>a,b</sup>

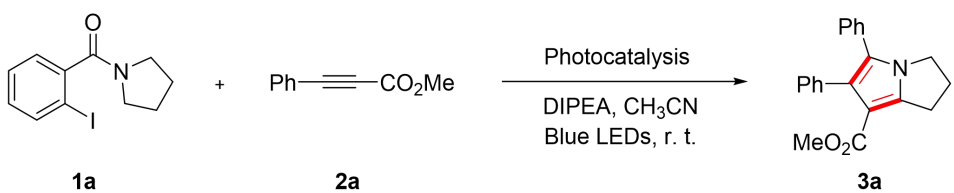

| Entry | Photocatalyst                                               | Reductant | Solvent            | Conversion(%) | Y(%) <sup>b</sup> |
|-------|-------------------------------------------------------------|-----------|--------------------|---------------|-------------------|
| 1     | Ru(bpy) <sub>3</sub> Cl <sub>2</sub>                        | DIPEA     | CH <sub>3</sub> CN | 75            | 28                |
| 2     | Eosin Y                                                     | DIPEA     | CH <sub>3</sub> CN | 7             | trace             |
| 3     | 4-CzIPN                                                     | DIPEA     | CH <sub>3</sub> CN | 8             | trace             |
| 4     | <i>fac</i> -Ir(dFppy) <sub>3</sub>                          | DIPEA     | CH <sub>3</sub> CN | 14            | trace             |
| 5     | Ir(dFCF <sub>3</sub> ppy) <sub>2</sub> bpyPF <sub>6</sub>   | DIPEA     | CH <sub>3</sub> CN | 58            | 24                |
| 6     | Ir(dFppy) <sub>2</sub> bpyPF <sub>6</sub>                   | DIPEA     | CH <sub>3</sub> CN | 8             | trace             |
| 7     | Ir(dFCF <sub>3</sub> ppy) <sub>2</sub> dtbpyPF <sub>6</sub> | DIPEA     | CH <sub>3</sub> CN | 82            | 22                |
| 8     | Ir(dFCF <sub>3</sub> ppy) <sub>2</sub> bpyPF <sub>6</sub>   | DIPEA     | CH <sub>3</sub> CN | 62            | 48                |
| 9     | DPA                                                         | DIPEA     | CH <sub>3</sub> CN | 0             | 0                 |
| 11    | Thioxanthen-9-one                                           | DIPEA     | CH <sub>3</sub> CN | 9             | trace             |
| 12    | Benzophenone                                                | DIPEA     | CH <sub>3</sub> CN | 0             | 0                 |

[a] Reaction conditions: photocatalyst (1 mol%), **1a** (0.1 mmol, 1.0 equiv), **2a** (0.2 mmol, 2 equiv.), Reductant (4 equiv.), CH<sub>3</sub>CN (1 mL), room temperature, N<sub>2</sub> atmosphere, 2\*12 W blue LEDs. [b] isolated yields.

**Table S2.** Reductant and Base Screening.<sup>a,b</sup>

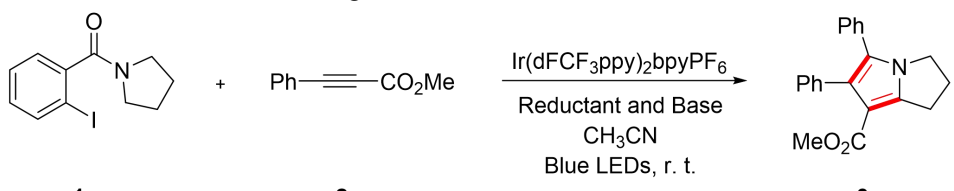

| Entry | Photocatalyst                                             | Reductant                               | Solvent            | Conversion(%) | Y(%) <sup>b</sup> |
|-------|-----------------------------------------------------------|-----------------------------------------|--------------------|---------------|-------------------|
| 1     | Ir(dFCF <sub>3</sub> ppy) <sub>2</sub> bpyPF <sub>6</sub> | DIPEA                                   | CH <sub>3</sub> CN | 62            | 48                |
| 2     | Ir(dFCF <sub>3</sub> ppy) <sub>2</sub> bpyPF <sub>6</sub> | Et <sub>3</sub> N                       | CH <sub>3</sub> CN | 95            | 0                 |
| 3     | Ir(dFCF <sub>3</sub> ppy) <sub>2</sub> bpyPF <sub>6</sub> | TMEDA                                   | CH <sub>3</sub> CN | 8             | trace             |
| 4     | Ir(dFCF <sub>3</sub> ppy) <sub>2</sub> bpyPF <sub>6</sub> | quinuclidine                            | CH <sub>3</sub> CN | 0             | 0                 |
| 5     | Ir(dFCF <sub>3</sub> ppy) <sub>2</sub> bpyPF <sub>6</sub> | Hantzsch Esters                         | CH <sub>3</sub> CN | 0             | 0                 |
| 6     | Ir(dFCF <sub>3</sub> ppy) <sub>2</sub> bpyPF <sub>6</sub> | DIPEA, K <sub>2</sub> CO <sub>3</sub>   | CH <sub>3</sub> CN | 75            | 23                |
| 7     | Ir(dFCF <sub>3</sub> ppy) <sub>2</sub> bpyPF <sub>6</sub> | DIPEA, Na <sub>2</sub> HPO <sub>4</sub> | CH <sub>3</sub> CN | 84            | 33                |
| 8     | Ir(dFCF <sub>3</sub> ppy) <sub>2</sub> bpyPF <sub>6</sub> | DIPEA, Na <sub>2</sub> CO <sub>3</sub>  | CH <sub>3</sub> CN | 65            | 18                |
| 9     | Ir(dFCF <sub>3</sub> ppy) <sub>2</sub> bpyPF <sub>6</sub> | DIPEA, NaOAc                            | CH <sub>3</sub> CN | 85            | 36                |
| 10    | Ir(dFCF <sub>3</sub> ppy) <sub>2</sub> bpyPF <sub>6</sub> | DIPEA, NaF                              | CH <sub>3</sub> CN | 72            | 31                |

[a] Reaction conditions: photocatalyst (1 mol%), **1a** (0.1 mmol, 1.0 equiv), **2a** (0.2 mmol, 2 equiv.), reductant (4 equiv.), base (2 equiv.), CH<sub>3</sub>CN (1 mL), room temperature, N<sub>2</sub> atmosphere, 2\*12 W blue

LEDs. [b] isolated yields.

**Table S3.** Solvent Screening.<sup>a</sup>

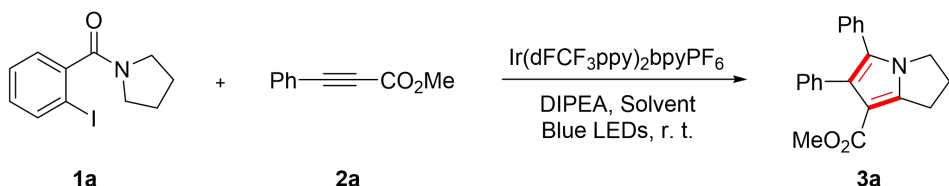

| Entry | Photocatalyst                                             | Reductant | Solvent            | Conversion(%) | Y(%) <sup>b</sup> |
|-------|-----------------------------------------------------------|-----------|--------------------|---------------|-------------------|
| 1     | Ir(dFCF <sub>3</sub> ppy) <sub>2</sub> bpyPF <sub>6</sub> | DIPEA     | DCM                | 80            | 14                |
| 2     | Ir(dFCF <sub>3</sub> ppy) <sub>2</sub> bpyPF <sub>6</sub> | DIPEA     | DCE                | 64            | 21                |
| 3     | Ir(dFCF <sub>3</sub> ppy) <sub>2</sub> bpyPF <sub>6</sub> | DIPEA     | DMF                | 63            | 28                |
| 4     | Ir(dFCF <sub>3</sub> ppy) <sub>2</sub> bpyPF <sub>6</sub> | DIPEA     | DMSO               | 55            | 19                |
| 5     | Ir(dFCF <sub>3</sub> ppy) <sub>2</sub> bpyPF <sub>6</sub> | DIPEA     | DMA                | 42            | 24                |
| 6     | Ir(dFCF <sub>3</sub> ppy) <sub>2</sub> bpyPF <sub>6</sub> | DIPEA     | NMP                | 66            | 23                |
| 7     | Ir(dFCF <sub>3</sub> ppy) <sub>2</sub> bpyPF <sub>6</sub> | DIPEA     | THF                | 12            | trace             |
| 8     | Ir(dFCF <sub>3</sub> ppy) <sub>2</sub> bpyPF <sub>6</sub> | DIPEA     | EtOAc              | 55            | 20                |
| 9     | Ir(dFCF <sub>3</sub> ppy) <sub>2</sub> bpyPF <sub>6</sub> | DIPEA     | CH <sub>3</sub> OH | 6             | trace             |
| 10    | Ir(dFCF <sub>3</sub> ppy) <sub>2</sub> bpyPF <sub>6</sub> | DIPEA     | 1,4-dioxane        | 8             | trace             |
| 11    | Ir(dFCF <sub>3</sub> ppy) <sub>2</sub> bpyPF <sub>6</sub> | DIPEA     | Benzotrifluoride   | 13            | trace             |
| 12    | Ir(dFCF <sub>3</sub> ppy) <sub>2</sub> bpyPF <sub>6</sub> | DIPEA     | TFE                | 7             | trace             |
| 13    | Ir(dFCF <sub>3</sub> ppy) <sub>2</sub> bpyPF <sub>6</sub> | DIPEA     | HFIP               | none          | none              |

[a] Reaction conditions: photocatalyst (1 mol%), **1a** (0.1 mmol, 1.0 equiv), **2a** (0.2 mmol, 2 equiv.), reductant (4 equiv.), CH<sub>3</sub>CN (1 mL), room temperature, N<sub>2</sub> atmosphere, 2\*12 W blue LEDs. [b] isolated yields.

**Table S4.** Additive Screening.<sup>a</sup>

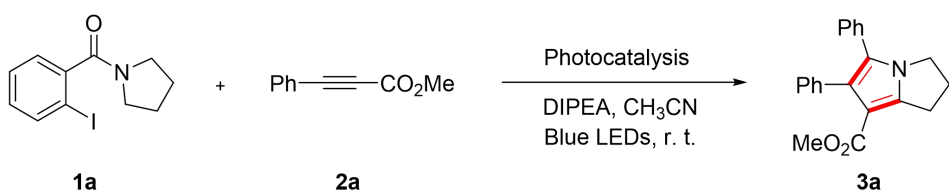

| Entry | Photocatalyst                                             | Reductant | Additive            | Solvent            | Conversion(%) | Y(%) <sup>b</sup> |
|-------|-----------------------------------------------------------|-----------|---------------------|--------------------|---------------|-------------------|
| 1     | Ir(dFCF <sub>3</sub> ppy) <sub>2</sub> bpyPF <sub>6</sub> | DIPEA     | -                   | CH <sub>3</sub> CN | 62            | 48                |
| 2     | Ir(dFCF <sub>3</sub> ppy) <sub>2</sub> bpyPF <sub>6</sub> | DIPEA     | Bu <sub>4</sub> NCl | CH <sub>3</sub> CN | 89            | 43                |
| 3     | Ir(dFCF <sub>3</sub> ppy) <sub>2</sub> bpyPF <sub>6</sub> | DIPEA     | Bu <sub>4</sub> NBr | CH <sub>3</sub> CN | 69            | 27                |
| 4     | Ir(dFCF <sub>3</sub> ppy) <sub>2</sub> bpyPF <sub>6</sub> | DIPEA     | Bu <sub>4</sub> NI  | CH <sub>3</sub> CN | 78            | 37                |
| 5     | Ir(dFCF <sub>3</sub> ppy) <sub>2</sub> bpyPF <sub>6</sub> | DIPEA     | LiCl                | CH <sub>3</sub> CN | 89            | 41                |
| 6     | Ir(dFCF <sub>3</sub> ppy) <sub>2</sub> bpyPF <sub>6</sub> | DIPEA     | LiBr                | CH <sub>3</sub> CN | 66            | 25                |

[a] Reaction conditions: photocatalyst (1 mol%), **1a** (0.1 mmol, 1.0 equiv), **2a** (0.2 mmol, 2 equiv), Reductant (4 equiv.), CH<sub>3</sub>CN (1 mL), room temperature, N<sub>2</sub> atmosphere, 2\*12 W blue LEDs. [b] isolated yields.

**Table S5.** Light and amount of reductant screening.

**1a** + **2a**  $\xrightarrow[\text{DIPEA, CH}_3\text{CN, Blue LEDs, r. t.}]{\text{Photocatalysis}}$  **3a**

| Entry <sup>a</sup> | Photocatalyst                                             | Reductant | Light source | Solvent            | Conversion(%) | Y(%) <sup>b</sup> |
|--------------------|-----------------------------------------------------------|-----------|--------------|--------------------|---------------|-------------------|
| 1                  | Ir(dFCF <sub>3</sub> ppy) <sub>2</sub> bpyPF <sub>6</sub> | DIPEA     | 450 nm       | CH <sub>3</sub> CN | 100           | 56                |
| 2                  | Ir(dFCF <sub>3</sub> ppy) <sub>2</sub> bpyPF <sub>6</sub> | DIPEA     | 390-395 nm   | CH <sub>3</sub> CN | 100           | trace             |
| 3                  | Ir(dFCF <sub>3</sub> ppy) <sub>2</sub> bpyPF <sub>6</sub> | DIPEA     | 400-405 nm   | CH <sub>3</sub> CN | 100           | trace             |
| 4                  | Ir(dFCF <sub>3</sub> ppy) <sub>2</sub> bpyPF <sub>6</sub> | DIPEA     | 425-430 nm   | CH <sub>3</sub> CN | 100           | 60                |
| 5 <sup>c</sup>     | Ir(dFCF <sub>3</sub> ppy) <sub>2</sub> bpyPF <sub>6</sub> | DIPEA     | 430 nm       | CH <sub>3</sub> CN | 100           | 40                |
| 6 <sup>d</sup>     | Ir(dFCF <sub>3</sub> ppy) <sub>2</sub> bpyPF <sub>6</sub> | DIPEA     | 430 nm       | CH <sub>3</sub> CN | 100           | 46                |

[a] Reaction conditions: photocatalyst (1 mol%), **1a** (0.1 mmol, 1.0 equiv.), **2a** (0.2 mmol, 2 equiv.), Reductant (4 equiv.), CH<sub>3</sub>CN (1 mL), room temperature, N<sub>2</sub> atmosphere. [b] isolated yields. [c] the reaction was conducted with 3 equiv DIPEA. [d] the reaction was conducted with 5 equiv DIPEA.

### 3. General Procedure for the synthesis of polysubstituted pyrroles.

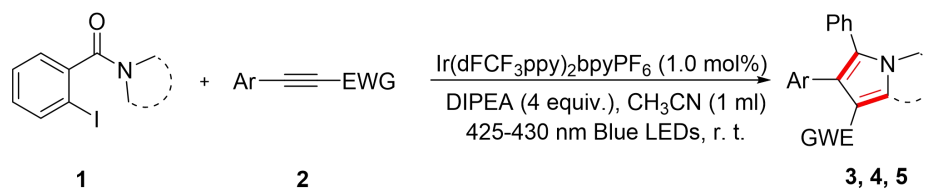

In a dried sealed tube, **1** (0.1 mmol), **2** (0.2 mmol), Ir(dFCF<sub>3</sub>ppy)<sub>2</sub>bpyPF<sub>6</sub> (1.0 mol %), DIPEA (0.4 mmol), were dissolved in CH<sub>3</sub>CN (1.0 mL). The flask was capped and degassed oxygen with N<sub>2</sub> for three times at -78 °C. Subsequently, the reaction mixture was exposed to 2 \*12 W blue LEDs at room temperature until the starting materials was completely consumed (monitored by TLC). After the reaction finished, the reaction solvent was distill under vacuum, the residue was purified by flash column chromatography on silica gel with ethyl acetate (EA) and petroleum ether (PE) to afford the corresponding products.

#### 4. General procedure for the synthesis of corresponding substrates.

##### General procedure for the synthesis of amides<sup>1-3</sup>.

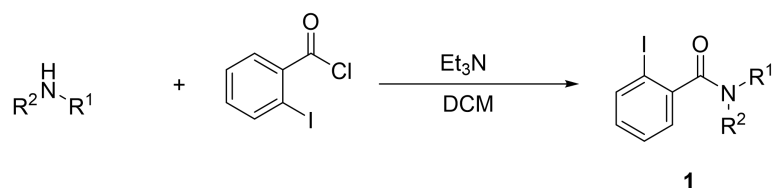

Amine (1.0 equiv.), Et<sub>3</sub>N (2 equiv.) were dissolved in DCM (0.2 M). And 2-iodo-benzoylchlorid (1.0 equiv.) was added in dropwise at 0 °C. After addition, the reaction mixture was stirred at room temperature for 12 hours. After the material was completely consumed, 10 mL 1M HCl was added in the reaction mixture, and extracted with EA (20 mL\*3), the combine solvents was washed with brine (30 mL), dried over Na<sub>2</sub>SO<sub>4</sub>. The solvent was concentrated and purification by chromatography on silica gel to afford the desired substrates.

##### General procedure for the synthesis of esters<sup>4</sup>.

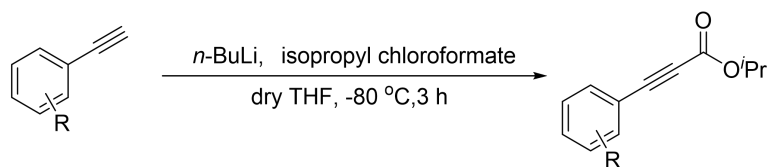

Ethynylbenzene (2 mmol, 1.0 equiv) was dissolved in dry THF (20 mL). And *n*-BuLi (1 mL, 2.5 M in hexanes, 0.3 mmol, 1.25 equiv) was added at -80 °C, the reaction mixture was stirred for 30 min at -80 °C. Isopropyl chloroformate (1.2 equiv., 2.4 mmol) was added with dropwise, and the reaction mixture was stirred for additional 2.5 h. When the substrate was completely consumed, the reaction was quenched with ice water (20 mL) and extracted with EA (20 mL\*3). The organic layers were then combined and washed with brine (30 mL), dried over MgSO<sub>4</sub>. The solvent was concentrated and purification by chromatography on silica gel to afford the desired substrates.

## 5. Product Characterization

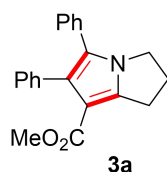

The photoredox reaction was performed according to the general procedure using **1a** with CH<sub>3</sub>CN as the solvent. The reaction was run for 36 h, the corresponding product **3a** was purified by flash column chromatography with PE/EA (30:1) to provide **3a** (19.0 mg, 60% yield) as a colorless oil..

**<sup>1</sup>H NMR (400 MHz, CDCl<sub>3</sub>):**  $\delta_H$  7.19-7.07 (m, 8H), 7.06-6.98 (m, 2H), 3.95 (t,  $J = 7.1$  Hz, 1H), 3.60 (s, 3H), 3.14 (t,  $J = 7.4$  Hz, 2H), 2.45 (p,  $J = 7.3$  Hz, 2H).

**<sup>13</sup>C NMR (101 MHz, CDCl<sub>3</sub>):**  $\delta_C$  165.5, 144.8, 135.4, 132.0, 131.1, 129.3, 128.3, 127.5, 127.2, 127.1, 126.9, 126.3, 105.95, 50.7, 47.2, 26.8, 26.5.

**HRMS (ESI):** calcd for C<sub>21</sub>H<sub>20</sub>NO<sub>2</sub><sup>+</sup>, (M+H)<sup>+</sup>: 318.1489, found: 318.1492.

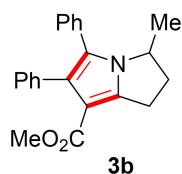

The photoredox reaction was performed according to the general procedure using **1b** with CH<sub>3</sub>CN as the solvent. The reaction was run for 48 h, the corresponding product **3b** was purified by flash column chromatography with PE/EA (30:1) to provide **3b** (12.6 mg, 38% yield) as a colorless oil, ( 14.3 mg, 43% brsm).

**<sup>1</sup>H NMR (400 MHz, CDCl<sub>3</sub>):**  $\delta_H$  7.26-7.16 (m, 8H), 7.16-7.12 (m, 2H), 4.67 (dq,  $J = 12.9, 6.4, 3.5$  Hz, 1H), 3.68 (s, 3H), 3.29-3.10 (m, 2H), 2.77 (dq,  $J = 12.9, 8.2$  Hz, 1H), 2.16 (qdd,  $J = 7.8, 6.2, 4.0$  Hz, 1H), 1.00 (d,  $J = 6.4$  Hz, 3H).

**<sup>13</sup>C NMR (101 MHz, CDCl<sub>3</sub>):**  $\delta_C$  165.6, 144.1, 135.3, 132.1, 131.1, 129.7, 128.3, 127.7, 127.3, 127.1, 126.8, 126.1, 105.5, 55.1, 50.6, 34.5, 25.4, 21.0.

**HRMS (ESI):** calcd for C<sub>22</sub>H<sub>22</sub>NO<sub>2</sub><sup>+</sup>, (M+H)<sup>+</sup>: 332.1645, found: 332.1649.

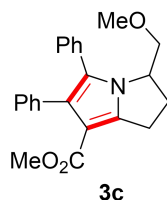

The photoredox reaction was performed according to the general procedure using **1c** with CH<sub>3</sub>CN as the solvent.. The reaction was run for 48 h, the corresponding product **3c** was purified by flash column chromatography with PE/EA (30:1) to provide **3c** (13.0 mg, 36% yield) as a colorless oil, ( 15.9 mg, 44% brsm).

**<sup>1</sup>H NMR (400 MHz, CDCl<sub>3</sub>):**  $\delta_H$  7.25-7.16 (m, 8H), 7.13 (dd,  $J = 7.8, 1.7$  Hz, 2H), 4.66 (ddt,  $J = 8.8, 6.0, 2.9$  Hz, 1H), 3.67 (s, 3H), 3.17 (ddd,  $J = 14.1, 9.4, 4.7$  Hz, 3H), 3.07 (s, 3H), 3.03 (dd,  $J = 9.9, 6.3$  Hz, 1H), 2.69 (dq,  $J = 13.1, 8.8$  Hz, 1H), 2.50 (dtd,  $J = 8.6, 6.0, 2.6$  Hz, 1H).



**<sup>13</sup>C NMR (101 MHz, CDCl<sub>3</sub>):**  $\delta_C$  165.6, 145.3, 135.2, 132.1, 131.2, 129.7, 128.4, 127.9, 127.4, 127.2, 126.9, 126.2, 105.8, 73.2, 59.2, 58.5, 50.7, 29.96, 25.8.

**HRMS (ESI):** calcd for C<sub>23</sub>H<sub>23</sub>NO<sub>3</sub><sup>+</sup>, (M+H)<sup>+</sup>: 362.1751, found: 362.1754.

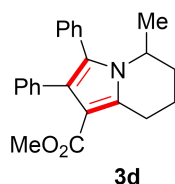

The photoredox reaction was performed according to the general procedure using **1d** with CH<sub>3</sub>CN as the solvent.. The reaction was run for 48 h, the corresponding product **3d** was purified by flash column chromatography with PE/EA (30:1) to afford **3d** (13.8 mg, 40% yield) as a colorless oil, (17.6 mg, 51% brsm).

**<sup>1</sup>H NMR (400 MHz, CDCl<sub>3</sub>):**  $\delta_H$  7.27-7.23 (m, 3H), 7.19-7.05 (m, 7H), 4.44 (dt,  $J$  = 12.0, 3.3 Hz, 1H), 3.60 (s, 3H), 3.45 (ddd,  $J$  = 12.9, 8.7, 4.4 Hz, 1H), 2.94 (ddd,  $J$  = 18.0, 10.7, 7.3 Hz, 1H), 2.18-2.03 (m, 1H), 1.99-1.85 (m, 2H), 1.79 (dd,  $J$  = 12.9, 2.8 Hz, 1H), 1.00 (d,  $J$  = 6.6 Hz, 3H).

**<sup>13</sup>C NMR (101 MHz, CDCl<sub>3</sub>):**  $\delta_C$  166.3, 136.4, 135.8, 132.3, 131.5, 130.98, 130.7, 128.3, 127.6, 127.0, 125.7, 124.8, 109.3, 50.4, 48.2, 29.6, 24.1, 21.4, 15.8.

**HRMS (ESI):** calcd for C<sub>23</sub>H<sub>24</sub>NO<sub>2</sub><sup>+</sup>, (M+H)<sup>+</sup>: 346.1802, found: 346.1800.

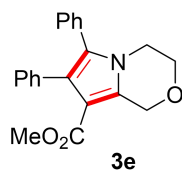

The photoredox reaction was performed according to the general procedure using **1e** with CH<sub>3</sub>CN as the solvent. The reaction was run for 48 h, the corresponding product **3e** was purified by flash column chromatography with PE/EA (10:1) to afford **3e** (16.0 mg, 48% yield) as a colorless oil, (22.3 mg, 67% brsm).

**<sup>1</sup>H NMR (400 MHz, CDCl<sub>3</sub>):**  $\delta_H$  7.29-7.26 (m, 1H), 7.25 (dd,  $J$  = 5.0, 1.6 Hz, 1H), 7.21-7.11 (m, 2H), 5.18 (s, 2H), 4.06 - 3.97 (t, 2H), 3.87-3.81 (t, 2H), 3.65 (s, 3H).

**<sup>13</sup>C NMR (101 MHz, CDCl<sub>3</sub>):**  $\delta_C$  165.4, 134.8, 133.6, 131.5, 131.0, 130.99, 130.7, 128.4, 127.8, 127.4, 126.3, 124.2, 108.3, 65.8, 64.0, 50.8, 43.8.

**HRMS (ESI):** calcd for C<sub>21</sub>H<sub>20</sub>NO<sub>3</sub><sup>+</sup>, (M+H)<sup>+</sup>: 334.1438, found: 334.1429.

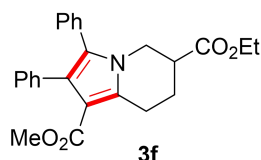

The photoredox reaction was performed according to the general procedure using **1f** with CH<sub>3</sub>CN as the solvent. The reaction was run for 48 h, the corresponding product **3f** was purified by flash column chromatography with PE/EA (30:1) to afford **3f** (11.7 mg, 29% yield) as a colorless oil, (13.7 mg, 34% brsm)..

**<sup>1</sup>H NMR (400 MHz, CDCl<sub>3</sub>):**  $\delta_H$  7.26 (dd,  $J$  = 8.6, 3.5 Hz, 2H), 7.21-7.07 (m, 7H), 4.21-4.11 (m, 2H), 4.01-3.87 (m, 2H), 3.61 (s, 3H), 3.48-3.36 (m, 1H), 3.21-3.08 (m, 1H), 2.94-2.82 (m, 1H), 2.32 (dd,  $J$  = 8.5, 4.8 Hz, 1H), 2.11-1.97 (m, 1H), 1.26 (t,  $J$  = 7.1 Hz, 3H).

**<sup>13</sup>C NMR (101 MHz, CDCl<sub>3</sub>):**  $\delta_C$  172.7, 166.0, 135.6, 135.5, 131.3, 131.2, 130.9, 128.3, 127.7, 127.2, 125.98, 124.5, 109.6, 53.6, 50.55, 45.6, 39.9, 23.7, 23.4, 14.3.

**HRMS (ESI):** calcd for C<sub>25</sub>H<sub>26</sub>NO<sub>4</sub><sup>+</sup>, (M+H)<sup>+</sup>: 404.1856, found: 404.1862.

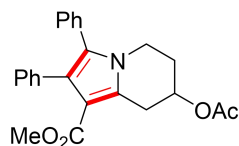

**3g**

The photoredox reaction was performed according to the general procedure using **1g** with CH<sub>3</sub>CN as the solvent. The reaction was run for 48 h, the corresponding product **3g** was purified by flash column chromatography with PE/EA (20:1) to afford **3g** (13.2 mg, 34% yield) as a colorless oil.

**<sup>1</sup>H NMR (400 MHz, CDCl<sub>3</sub>):**  $\delta_H$  7.20-7.14 (m, 3H), 7.12-7.01 (m, 7H), 5.34-5.22 (m, 1H), 3.84 (ddd,  $J$  = 13.2, 8.1, 5.2 Hz, 1H), 3.79-3.70 (m, 1H), 3.55 (s, 3H), 3.43 (dd,  $J$  = 18.5, 5.3 Hz, 1H), 3.28 (dd,  $J$  = 18.5, 5.1 Hz, 1H), 2.07 (dd,  $J$  = 11.1, 5.5 Hz, 2H), 2.03 (s, 3H).

**<sup>13</sup>C NMR (101 MHz, CDCl<sub>3</sub>):**  $\delta_C$  170.6, 165.7, 135.3, 133.5, 131.3, 131.2, 131.1, 130.9, 128.3, 127.7, 127.3, 126.0, 124.6, 110.2, 66.2, 50.6, 40.8, 30.4, 27.6, 21.4.

**HRMS (ESI):** calcd for C<sub>24</sub>H<sub>24</sub>NO<sub>4</sub><sup>+</sup>, (M+H)<sup>+</sup>: 390.1700, found: 390.1701.

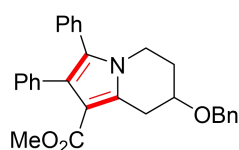

**3h**

The photoredox reaction was performed according to the general procedure using **1h** with CH<sub>3</sub>CN as the solvent. The reaction was run for 48 h, the corresponding product **3h** was purified by flash column chromatography with PE/EA (20:1) to afford **3h** (24.9 mg, 57% yield) as a colorless oil.

**<sup>1</sup>H NMR (400 MHz, CDCl<sub>3</sub>):**  $\delta_H$  7.41-7.34 (m, 4H), 7.33-7.28 (m, 1H), 7.23 (dd,  $J$  = 5.6, 4.3 Hz, 3H), 7.13 (dt,  $J$  = 5.3, 3.7 Hz, 7H), 4.67 (q,  $J$  = 12.0 Hz, 2H), 4.08-3.93 (m, 2H), 3.82-3.70 (m, 1H), 3.62 (s, 3H), 3.43 (qd,  $J$  = 18.1, 5.2 Hz, 2H), 2.23-2.02 (m, 2H).

**<sup>13</sup>C NMR (101 MHz, CDCl<sub>3</sub>):**  $\delta_C$  166.0, 138.4, 135.6, 134.7, 131.6, 131.3, 130.96, 130.9, 128.6, 128.2, 127.9, 127.8, 127.6, 127.2, 125.9, 124.4, 110.0, 70.5, 70.2, 50.5, 41.3, 30.5, 28.2.

**HRMS (ESI):** calcd for C<sub>29</sub>H<sub>28</sub>NO<sub>3</sub><sup>+</sup>, (M+H)<sup>+</sup>: 438.2064, found: 438.2072.

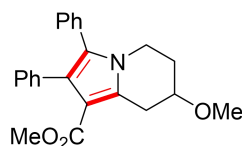

**3i**

The photoredox reaction was performed according to the general procedure using **1i** with CH<sub>3</sub>CN as the solvent. The reaction was run for 48 h, the corresponding product **3i** was purified by flash column chromatography with PE/EA (20:1) to provide **3i** (15.3 mg, 40% yield) as a colorless oil.

**<sup>1</sup>H NMR (400 MHz, CDCl<sub>3</sub>):**  $\delta_H$  7.24 (t,  $J$  = 5.1 Hz, 3H), 7.20-7.05 (m, 7H), 3.93 (ddd,  $J$  = 13.1, 8.1, 5.1 Hz, 1H), 3.84 (q,  $J$  = 7.7 Hz, 1H), 3.78-3.70 (m, 1H), 3.62 (s, 3H), 3.45 (s, 3H), 3.42-3.30 (m, 2H), 2.20-2.01 (m, 2H).

**<sup>13</sup>C NMR (101 MHz, CDCl<sub>3</sub>):**  $\delta_C$  166.0, 135.6, 134.5, 131.6, 131.3, 130.9, 128.2, 127.6, 127.2, 125.9, 124.4, 110.1, 72.3, 56.4, 50.5, 41.0, 30.0, 27.7.

**HRMS (ESI):** calcd for C<sub>23</sub>H<sub>23</sub>NNaO<sub>3</sub><sup>+</sup>, (M+Na)<sup>+</sup>: 384.1570, found: 384.1561.

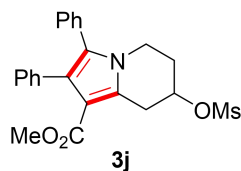

The photoredox reaction was performed according to the general procedure using **1j** with CH<sub>3</sub>CN as the solvent. The reaction was run for 72 h, the desired product **3j** was purified by flash column chromatography with PE/EA (10:1) to afford **3j** (27.2 mg, 64% yield) as a colorless oil.

**<sup>1</sup>H NMR (400 MHz, CDCl<sub>3</sub>):**  $\delta_H$  7.18 (dd,  $J$  = 4.5, 2.5 Hz, 3H), 7.14- 6.97 (m, 7H), 5.30-5.17 (m, 1H), 3.94 (ddd,  $J$  = 13.8, 9.6, 4.6 Hz, 1H), 3.84-3.72 (m, 1H), 3.55 (s, 3H), 3.53-3.41 (m, 2H), 3.03 (s, 3H), 2.35 (dq,  $J$  = 14.8, 5.0 Hz, 1H), 2.24-2.09 (m, 1H).

**<sup>13</sup>C NMR (101 MHz, CDCl<sub>3</sub>):**  $\delta_C$  165.7, 135.2, 131.9, 131.4, 131.2, 131.0, 130.9, 128.4, 127.9, 127.3, 126.1, 124.6, 110.6, 73.8, 50.7, 40.1, 39.1, 31.1, 28.9.

**HRMS (ESI):** calcd for C<sub>23</sub>H<sub>24</sub>NSO<sub>5</sub><sup>+</sup>, (M+H)<sup>+</sup>: 426.1370, found: 426.1373.

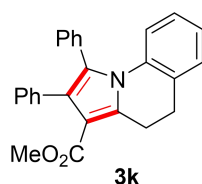

The reaction was conducted according to the general procedure using **1k** with CH<sub>3</sub>CN as the solvent. The reaction was run for 72 h, the desired product **3k** was purified by flash column chromatography with PE/EA (10:1) to afford **3k** as a colorless oil, 58% isolated yield (75% brsm).

**<sup>1</sup>H NMR (400 MHz, CDCl<sub>3</sub>):**  $\delta_H$  7.58-7.50 (m, 1H), 7.44 (dd,  $J$  = 10.7, 4.1 Hz, 1H), 7.39-7.34 (m, 2H), 7.34-7.27 (m, 5H), 7.23-7.16 (m, 3H), 6.91 (d,  $J$  = 7.7 Hz, 1H), 6.85 (s, 1H), 3.50 (s, 3H), 2.98-2.82 (m, 2H), 2.75 (ddd,  $J$  = 13.1, 9.1, 7.0 Hz, 1H), 2.40-2.29 (m, 1H).

**<sup>13</sup>C NMR (101 MHz, CDCl<sub>3</sub>):**  $\delta_C$  168.9, 136.1, 135.5, 134.1, 134.1, 132.97, 130.3, 128.6, 128.4, 128.3, 128.3, 128.2, 128.2, 127.96, 126.6, 126.6, 126.3, 125.2, 57.2, 51.9, 25.99.

**HRMS (ESI):** calcd for C<sub>26</sub>H<sub>22</sub>NO<sub>2</sub><sup>+</sup>, (M+H)<sup>+</sup>: 380.1645, found: 380.1644.

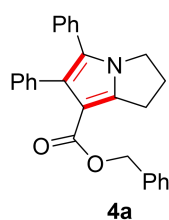

The photoredox reaction was performed according to the general procedure using **2b** with CH<sub>3</sub>CN as the solvent. The reaction was run for 48 h, the corresponding product **4a** was purified by flash column chromatography with PE/EA (30:1) to afford **4a** (19.2 mg, 49% yield) as a colorless oil (55% brsm).

**<sup>1</sup>H NMR (400 MHz, CDCl<sub>3</sub>):**  $\delta_H$  7.31-7.16 (m, 13H), 7.13-7.07 (m, 2H), 5.16 (s, 2H), 4.02 (t,  $J = 7.1$  Hz, 2H), 3.21 (dd,  $J = 9.4, 5.5$  Hz, 2H), 2.59-2.44 (m, 2H).

**<sup>13</sup>C NMR (101 MHz, CDCl<sub>3</sub>):**  $\delta_C$  164.8, 145.1, 137.0, 135.5, 131.99, 131.2, 129.3, 128.4, 128.3, 127.9, 127.7, 127.6, 127.3, 127.2, 126.9, 126.3, 105.96, 65.1, 47.2, 26.9, 26.5.

**HRMS (ESI):** calcd for C<sub>27</sub>H<sub>24</sub>NO<sub>2</sub><sup>+</sup>, (M+H)<sup>+</sup>: 394.1802, found: 394.1809.

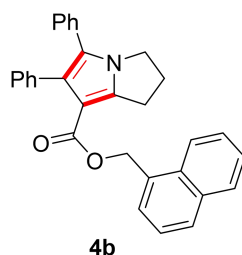

The photoredox reaction was performed according to the general procedure using **2c** with CH<sub>3</sub>CN as the solvent. The reaction was run for 48 h, the corresponding product **4b** was purified by flash column chromatography with PE/EA (60:1) to give **4b** (28.9 mg, 62% yield) as a colorless oil.

**<sup>1</sup>H NMR (400 MHz, CDCl<sub>3</sub>):**  $\delta_H$  7.93 (dd,  $J = 5.4, 4.3$  Hz, 1H), 7.86 (dd,  $J = 6.2, 3.3$  Hz, 1H), 7.80 (dd,  $J = 6.3, 3.1$  Hz, 1H), 7.51-7.46 (m, 2H), 7.37 (dd,  $J = 6.7, 3.5$  Hz, 2H), 7.25-7.13 (m, 8H), 7.10 (dd,  $J = 8.0, 1.5$  Hz, 2H), 5.62 (s, 2H), 3.99 (t,  $J = 7.1$  Hz, 2H), 3.09 (t,  $J = 7.5$  Hz, 2H), 2.49-2.34 (m, 2H).

**<sup>13</sup>C NMR (101 MHz, CDCl<sub>3</sub>):**  $\delta_C$  164.8, 145.2, 135.4, 133.7, 132.5, 131.98, 131.8, 131.1, 129.3, 128.8, 128.6, 128.3, 127.5, 127.3, 127.2, 127.1, 126.9, 126.4, 126.3, 125.8, 125.4, 124.0, 105.9, 63.5, 47.2, 26.8, 26.5.

**HRMS (ESI):** calcd for C<sub>31</sub>H<sub>25</sub>NNaO<sub>2</sub><sup>+</sup>, (M+Na)<sup>+</sup>: 466.1778, found: 466.1774.

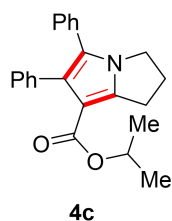

The photoredox reaction was performed according to the general procedure using **2d** with CH<sub>3</sub>CN as the solvent. The reaction was run for 48 h, the corresponding product **4c** was purified by flash column chromatography with PE/EA (30:1) to give **4c** (22.4 mg, 61% yield) as a colorless oil.

**<sup>1</sup>H NMR (400 MHz, CDCl<sub>3</sub>):**  $\delta_H$  7.25-7.15 (m, 8H), 7.14-7.08 (m, 2H), 5.06 (dt,  $J = 12.5, 6.2$  Hz, 1H), 4.03 (t,  $J = 7.1$  Hz, 2H), 3.23 (t,  $J = 7.4$  Hz, 2H), 2.54 (p,  $J = 7.3$  Hz, 2H), 1.16 (d,  $J = 6.2$  Hz, 6H).

**<sup>13</sup>C NMR (101 MHz, CDCl<sub>3</sub>):**  $\delta_C$  164.6, 144.6, 135.6, 132.1, 131.2, 129.3, 128.3, 127.4, 127.1, 126.96, 126.8, 126.2, 106.8, 66.3, 47.1, 26.8, 26.5, 22.2.

**HRMS (ESI):** calcd for C<sub>23</sub>H<sub>23</sub>NNaO<sub>2</sub><sup>+</sup>, (M+Na)<sup>+</sup>: 368.1621, found: 368.1620.

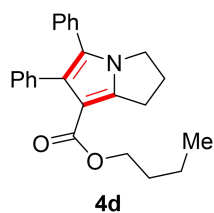

The photoredox reaction was performed according to the general procedure using **2e** with CH<sub>3</sub>CN as the solvent. The reaction was run for 48 h, the corresponding product **4d** was purified by flash column chromatography with PE/EA (40:1) to afford **4d** (23.0 mg, 64% yield) as a colorless oil, (27.3 mg, 76% brsm).

**<sup>1</sup>H NMR (400 MHz, CDCl<sub>3</sub>):**  $\delta_H$  7.25-7.14 (m, 8H), 7.14-7.07 (m, 2H), 4.09 (t,  $J = 6.4$  Hz, 2H), 4.03 (t,  $J = 7.1$  Hz, 2H), 3.22 (t,  $J = 7.5$  Hz, 2H), 2.60-2.45 (m, 2H), 1.51 (dt,  $J = 14.5, 6.5$  Hz, 2H), 1.25 (dd,  $J = 15.1, 7.4$  Hz, 2H), 0.86 (t,  $J = 7.4$  Hz, 3H).

**<sup>13</sup>C NMR (101 MHz, CDCl<sub>3</sub>):**  $\delta_C$  165.3, 144.8, 135.6, 132.1, 131.2, 129.3, 128.3, 127.5, 127.2, 127.0, 126.8, 126.2, 106.4, 63.2, 47.2, 30.95, 26.8, 26.5, 19.4, 13.9.

**HRMS (ESI):** calcd for C<sub>24</sub>H<sub>26</sub>NO<sub>2</sub><sup>+</sup>, (M+H)<sup>+</sup>: 360.1958, found: 360.1964.

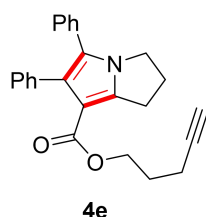

The photoredox reaction was performed according to the general procedure using **2f** with CH<sub>3</sub>CN as the solvent. The reaction was run for 72 h, the corresponding product **4e** was purified by flash column chromatography with PE/EA (60:1) to afford **4e** (15.1 mg, 41% yield) as a colorless oil, (16.6 mg, 45% brsm)..

**<sup>1</sup>H NMR (400 MHz, CDCl<sub>3</sub>):**  $\delta_H$  7.25-7.15 (m, 8H), 7.14-7.08 (m, 2H), 4.17 (t,  $J = 6.0$  Hz, 2H), 4.04 (t,  $J = 7.1$  Hz, 2H), 3.23 (t,  $J = 7.4$  Hz, 2H), 2.55 (p,  $J = 7.3$  Hz, 2H), 2.03 (td,  $J = 7.2, 2.6$  Hz, 2H), 1.92 (t,  $J = 2.6$  Hz, 1H), 1.79-1.64 (m, 2H).

**<sup>13</sup>C NMR (101 MHz, CDCl<sub>3</sub>):**  $\delta_C$  165.1, 144.9, 135.7, 132.0, 131.1, 129.3, 128.3, 127.5, 127.1, 127.1, 126.9, 126.4, 106.2, 83.7, 68.8, 61.8, 47.2, 27.9, 26.7, 26.6, 15.4.

**HRMS (ESI):** calcd for C<sub>25</sub>H<sub>24</sub>NO<sub>2</sub><sup>+</sup>, (M+H)<sup>+</sup>: 370.1802, found: 370.1800.

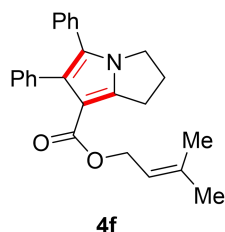

The photoredox reaction was performed according to the general procedure using **2g** with CH<sub>3</sub>CN as the solvent. The reaction was run for 48 h, the corresponding product **4f** was purified by flash column chromatography with PE/EA (10:1) to provide **4f** (12.2 mg, 33% yield) as a colorless oil, (16.3 mg, 44% brsm).

**<sup>1</sup>H NMR (400 MHz, CDCl<sub>3</sub>):**  $\delta_H$  7.25-7.15 (m, 8H), 7.14-7.08 (m, 2H), 5.29 (ddd,  $J = 7.0, 5.7, 1.3$  Hz, 1H), 4.60 (d,  $J = 7.0$  Hz, 2H), 4.03 (t,  $J = 7.1$  Hz, 2H), 3.22 (t,  $J = 7.4$  Hz, 2H), 2.53 (p,  $J = 7.3$  Hz, 2H), 1.70 (d,  $J = 12.4$  Hz, 3H), 1.63 (d,  $J = 11.7$  Hz, 3H).

**<sup>13</sup>C NMR (101 MHz, CDCl<sub>3</sub>):**  $\delta_C$  165.1, 144.8, 137.7, 135.5, 132.2, 131.2, 129.4, 128.3, 127.5, 127.3, 127.1, 126.9, 126.2, 119.7, 106.3, 60.3, 47.2, 26.8, 26.5, 25.8, 18.2.

**HRMS (ESI):** calcd for C<sub>25</sub>H<sub>26</sub>NO<sub>2</sub><sup>+</sup>, (M+H)<sup>+</sup>: 372.1958, found: 372.1966.

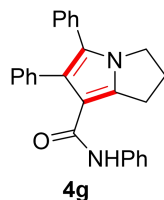

The photoredox reaction was performed according to the general procedure using **2h** with CH<sub>3</sub>CN as the solvent. The reaction was run for 72 h, the corresponding product **4g** was purified by flash column chromatography with PE/EA (10:1) to provide **4g** (15.9 mg, 42% yield) as a colorless oil, (20.4 mg, 54% brsm).

**<sup>1</sup>H NMR (400 MHz, CDCl<sub>3</sub>):**  $\delta_H$  7.40 (t,  $J = 3.5$  Hz, 5H), 7.25 - 7.19 (m, 3H), 7.18-7.08 (m, 7H), 6.96 (t,  $J = 7.2$  Hz, 1H), 4.06 (t,  $J = 7.1$  Hz, 2H), 3.36 (t,  $J = 7.4$  Hz, 2H), 2.62-2.50 (m, 2H).

**<sup>13</sup>C NMR (101 MHz, CDCl<sub>3</sub>):**  $\delta_C$  163.4, 144.7, 138.8, 135.4, 131.9, 131.7, 129.2, 129.0, 128.9, 128.4, 127.9, 126.9, 126.5, 123.5, 123.2, 119.1, 110.2, 46.96, 26.8, 26.5.

**HRMS (ESI):** calcd for C<sub>26</sub>H<sub>23</sub>N<sub>2</sub>O<sup>+</sup>, (M+H)<sup>+</sup>: 379.1805, found: 379.1810.

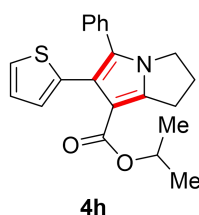

The photoredox reaction was performed according to the general procedure using **2i** with CH<sub>3</sub>CN as the solvent. The reaction was run for 48 h, the corresponding product **4h** was purified by flash column chromatography with PE/EA (20:1) to afford **4h** (15.1 mg, 43% yield) as a colorless oil, (18.9 mg, 54% brsm).

**<sup>1</sup>H NMR (400 MHz, CDCl<sub>3</sub>):**  $\delta_H$  7.36 -7.10 (m, 6H), 6.99-6.85 (m, 2H), 5.09 (dt,  $J = 12.5, 6.2$  Hz, 1H), 4.00 (t,  $J = 7.1$  Hz, 2H), 3.21 (t,  $J = 7.5$  Hz, 2H), 2.62 - 2.41 (m, 2H), 1.20 (d,  $J = 6.2$  Hz, 6H).

**<sup>13</sup>C NMR (101 MHz, CDCl<sub>3</sub>):**  $\delta$  164.3, 144.6, 136.7, 131.8, 129.3, 128.6, 128.4, 128.2, 127.3, 126.3, 125.0, 118.6, 107.7, 66.4, 47.2, 26.7, 26.5, 22.2.

**HRMS (ESI):** calcd for C<sub>21</sub>H<sub>22</sub>NSO<sub>2</sub><sup>+</sup>, (M+H)<sup>+</sup>: 352.1366, found: 352.1368.

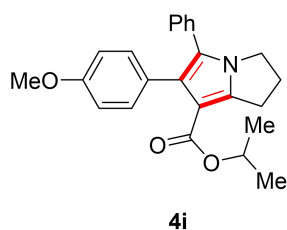

The photoredox reaction was performed according to the general procedure using **2j** with CH<sub>3</sub>CN as the solvent. The reaction was run for 48 h, the corresponding product **4i** was purified by flash column chromatography with PE/EA (10:1) to give **4i** (12.7 mg, 34% yield) as a colorless oil, (16.1 mg, 43% brsm).

**<sup>1</sup>H NMR (400 MHz, CDCl<sub>3</sub>):**  $\delta_H$  7.25-7.09 (m, 7H), 6.80-6.72 (m, 2H), 5.07 (dt,  $J = 12.5, 6.2$  Hz, 1H), 4.03 (t,  $J = 7.1$  Hz, 2H), 3.78 (s, 3H), 3.21 (t,  $J = 7.5$  Hz, 2H), 2.52 (p,  $J = 7.3$  Hz, 2H), 1.18 (d, 6H).

**<sup>13</sup>C NMR (101 MHz, CDCl<sub>3</sub>):**  $\delta_C$  164.6, 158.2, 144.5, 132.3, 132.2, 129.3, 128.3, 127.9, 126.9, 126.8, 126.8, 113.0, 106.7, 66.2, 55.3, 47.2, 29.8, 26.9, 26.5, 22.3.

**HRMS (ESI):** calcd for C<sub>24</sub>H<sub>26</sub>NO<sub>3</sub><sup>+</sup>, (M+H)<sup>+</sup>: 376.1907, found: 376.1913.

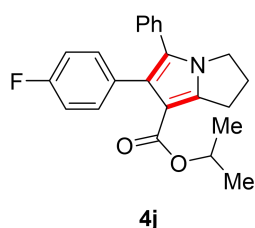

The photoredox reaction was performed according to the general procedure using **2k** with CH<sub>3</sub>CN as the solvent. The reaction was run for 48 h, the corresponding product **4j** was purified by flash column chromatography with PE/EA (15:1) to give **4j** (26.1 mg, 72% yield) as a colorless oil.

**<sup>1</sup>H NMR (400 MHz, CDCl<sub>3</sub>):**  $\delta_H$  7.25-7.15 (m, 5H), 7.13-7.05 (m, 2H), 6.97-6.86 (m, 2H), 5.07 (dt,  $J = 12.5, 6.2$  Hz, 1H), 4.03 (t,  $J = 7.1$  Hz, 2H), 3.22 (t,  $J = 7.5$  Hz, 2H), 2.54 (p,  $J = 7.3$  Hz, 2H), 1.18 (d,  $J = 6.2$  Hz, 6H).

**<sup>13</sup>C NMR (101 MHz, CDCl<sub>3</sub>):**  $\delta_C$  164.5, 161.73 (d,  $J = 244.3$  Hz), 144.7, 132.69 (d,  $J = 8.0$  Hz), 131.9, 131.53 (d,  $J = 3.4$  Hz), 131.5, 129.3, 128.4, 127.1, 126.98, 126.0, 114.34 (d,  $J = 21.2$  Hz), 106.7, 66.4, 47.1, 29.8, 26.8, 26.5, 22.2.

**<sup>19</sup>F NMR (376 MHz, CDCl<sub>3</sub>):**  $\delta_F$  -117.1.

**HRMS (ESI):** calcd for C<sub>23</sub>H<sub>23</sub>FNO<sub>2</sub><sup>+</sup>, (M+H)<sup>+</sup>: 364.1707, found: 364.1710.

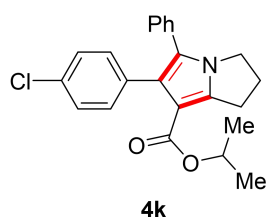

The photoredox reaction was performed according to the general procedure using **2l** with CH<sub>3</sub>CN as the solvent. The reaction was run for 48 h, the corresponding product **4k** was purified by flash column chromatography with PE/EA (10:1) to afford **4k** (14.4 mg, 38% yield) as a colorless oil.

**<sup>1</sup>H NMR (400 MHz, CDCl<sub>3</sub>):**  $\delta_H$  7.25-7.14 (m, 7H), 7.12-7.07 (m, 2H), 5.06 (dt,  $J = 12.4, 6.2$  Hz, 1H), 4.02 (t,  $J = 7.1$  Hz, 2H), 3.22 (t,  $J = 7.4$  Hz, 2H), 2.53 (p,  $J = 7.3$  Hz, 2H), 1.18 (d,  $J = 6.2$  Hz, 6H).

**<sup>13</sup>C NMR (101 MHz, CDCl<sub>3</sub>):**  $\delta_C$  164.5, 144.8, 134.1, 132.5, 132.1, 131.8, 129.3, 128.5, 127.7, 127.2, 127.1, 125.8, 106.6, 66.5, 47.1, 29.8, 26.8, 26.5, 22.2.

**HRMS (ESI):** calcd for C<sub>23</sub>H<sub>23</sub>ClNO<sub>2</sub><sup>+</sup>, (M+H)<sup>+</sup>: 380.1412, found: 380.1407.

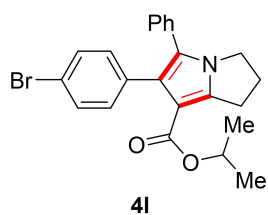

The photoredox reaction was performed according to the general procedure using **2m** with CH<sub>3</sub>CN as the solvent. The reaction was run for 72 h, the corresponding product **4l** was purified by flash column chromatography with PE/EA (10:1) to afford **4l** (12.3 mg, 29% yield) as a colorless oil, (16.5 mg, 39% brsm).

**<sup>1</sup>H NMR (400 MHz, CDCl<sub>3</sub>):**  $\delta_H$  7.24-7.17 (m, 7H), 7.12 (d,  $J = 6.9$  Hz, 2H), 5.06 (dt,  $J = 12.4, 6.2$  Hz, 1H), 4.03 (t,  $J = 7.1$  Hz, 2H), 3.23 (t,  $J = 7.4$  Hz, 2H), 2.54 (p,  $J = 7.3$  Hz, 2H), 1.15 (d,  $J = 6.2$  Hz, 6H).

**<sup>13</sup>C NMR (101 MHz, CDCl<sub>3</sub>):**  $\delta_C$  164.6, 144.6, 135.6, 132.2, 131.2, 129.3, 128.3, 127.4, 127.2, 126.97, 126.8, 126.2, 106.8, 66.3, 47.1, 26.8, 26.5, 22.2.

**HRMS (ESI):** calcd for C<sub>23</sub>H<sub>23</sub>BrNO<sub>2</sub><sup>+</sup>, (M+H)<sup>+</sup>: 424.0907, found: 424.0915.

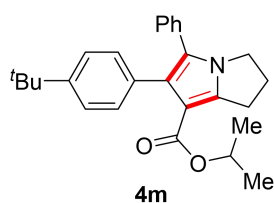

The photoredox reaction was performed according to the general procedure using **2n** with CH<sub>3</sub>CN as the solvent. The reaction was run for 48 h, the corresponding product **4m** was purified by flash column chromatography with PE/EA (10:1) to provide **4m** (19.2 mg, 48% yield) as a colorless oil, (23.2 mg, 58% brsm).

**<sup>1</sup>H NMR (400 MHz, CDCl<sub>3</sub>):**  $\delta_H$  7.19-7.11 (m, 5H), 7.11-7.02 (m, 5H), 4.98 (dt,  $J = 12.4, 6.2$  Hz, 1H), 3.94 (t,  $J = 7.1$  Hz, 2H), 3.14 (t,  $J = 7.4$  Hz, 2H), 2.43 (dd,  $J = 14.6, 7.2$  Hz, 2H), 1.22 (s, 9H), 1.07 (d,  $J = 6.2$  Hz, 6H).

**<sup>13</sup>C NMR (101 MHz, CDCl<sub>3</sub>):**  $\delta_C$  164.6, 148.8, 144.5, 132.4, 132.3, 130.7, 129.4, 128.2, 127.2, 126.9, 126.7, 124.3, 106.9, 66.1, 47.1, 34.5, 31.6, 26.8, 26.5, 22.2.

**HRMS (ESI):** calcd for C<sub>27</sub>H<sub>32</sub>NO<sub>2</sub><sup>+</sup>, (M+H)<sup>+</sup>: 402.2428, found: 402.2431.

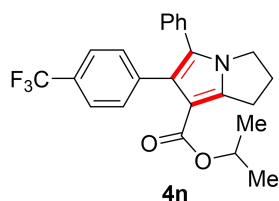

The photoredox reaction was performed according to the general procedure using **2o** with CH<sub>3</sub>CN as the solvent. The reaction was run for 48 h, the corresponding product **4n** was purified by flash column chromatography with PE/EA (10:1) to give **4n** (23.1 mg, 56% yield) as a colorless oil.

**<sup>1</sup>H NMR (400 MHz, CDCl<sub>3</sub>):**  $\delta_H$  7.39 (d,  $J = 8.1$  Hz, 2H), 7.27 (d,  $J = 8.0$  Hz, 2H), 7.20-7.13 (m, 3H), 7.01 (dd,  $J = 7.8, 1.6$  Hz, 2H), 4.98 (dt,  $J = 12.5, 6.2$  Hz, 1H), 3.95 (t,  $J = 7.1$  Hz, 2H), 3.15 (t,  $J = 7.5$  Hz, 2H), 2.47 (p,  $J = 7.3$  Hz, 2H), 1.10 (d,  $J = 6.2$  Hz, 6H).



**<sup>13</sup>C NMR (101 MHz, CDCl<sub>3</sub>):**  $\delta_C$  164.4, 144.96, 139.5, 131.6, 131.5, 129.4, 128.5, 127.3, 126.0, 128.4-125.9 (m), 125.6, 124.4 (q,  $J = 3.8$  Hz), 123.3, 106.6, 66.5, 47.1, 26.8, 26.5, 22.2.

**<sup>19</sup>F NMR (376 MHz, CDCl<sub>3</sub>):**  $\delta_F$  -62.25 (s).

**HRMS (ESI):** calcd for C<sub>24</sub>H<sub>23</sub>F<sub>3</sub>NO<sub>2</sub><sup>+</sup>, (M+H)<sup>+</sup>: 414.1675, found: 414.1667.

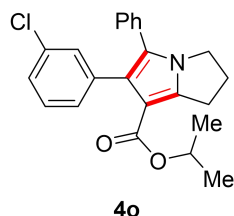

The photoredox reaction was performed according to the general procedure using **2p** with CH<sub>3</sub>CN as the solvent. The reaction was run for 48 h, the corresponding product **4o** was purified by flash column chromatography with PE/EA (10:1) to give **4o** (16.7 mg, 44% yield) as a colorless oil, (20.8 mg, 55% brsm).

**<sup>1</sup>H NMR (400 MHz, CDCl<sub>3</sub>):**  $\delta$  7.19-7.12 (m, 4H), 7.11-7.01 (m, 4H), 7.01-6.96 (m, 1H), 4.98 (dt,  $J = 12.5, 6.2$  Hz, 1H), 3.95 (t,  $J = 7.1$  Hz, 2H), 3.15 (t,  $J = 7.4$  Hz, 2H), 2.46 (p,  $J = 7.3$  Hz, 2H), 1.08 (d,  $J = 6.2$  Hz, 6H).

**<sup>13</sup>C NMR (101 MHz, CDCl<sub>3</sub>):**  $\delta_C$  164.5, 144.9, 137.7, 133.0, 131.7, 131.5, 129.4, 129.3, 128.6, 128.5, 127.2, 127.2, 126.3, 125.4, 106.8, 66.5, 47.1, 26.7, 26.6, 22.2.

**HRMS (ESI):** calcd for C<sub>23</sub>H<sub>23</sub>ClNO<sub>2</sub><sup>+</sup>, (M+H)<sup>+</sup>: 380.1412, found: 380.1409.

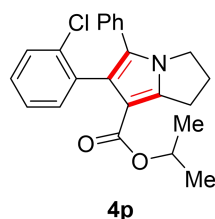

The photoredox reaction was performed according to the general procedure using **2q** with CH<sub>3</sub>CN as the solvent. The reaction was run for 72 h, the corresponding product **4p** was purified by flash column chromatography with PE/EA (10:1) to give **4p** (20.1 mg, 53% yield) as a colorless oil, (26.1 mg, 69% brsm).

**<sup>1</sup>H NMR (400 MHz, CDCl<sub>3</sub>):**  $\delta_H$  7.37 (dd,  $J = 7.9, 0.6$  Hz, 1H), 7.22 (dd,  $J = 7.9, 6.3$  Hz, 2H), 7.19-7.06 (m, 6H), 5.00 (dt,  $J = 12.4, 6.2$  Hz, 1H), 4.14 (dt,  $J = 10.7, 7.3$  Hz, 1H), 4.01 (dt,  $J = 10.7, 6.9$  Hz, 1H), 3.32-3.12 (m, 2H), 2.56 (p,  $J = 7.3$  Hz, 2H), 1.10 (d,  $J = 6.2$  Hz, 3H), 1.04 (d,  $J = 6.2$  Hz, 3H).

**<sup>13</sup>C NMR (101 MHz, CDCl<sub>3</sub>):**  $\delta_C$  164.4, 144.5, 135.8, 135.6, 132.7, 131.9, 128.8, 128.6, 128.4, 128.0, 127.1, 126.9, 126.1, 123.9, 107.6, 66.2, 47.2, 26.7, 26.4, 22.1, 21.9.

**HRMS (ESI):** calcd for C<sub>23</sub>H<sub>23</sub>ClNO<sub>2</sub><sup>+</sup>, (M+H)<sup>+</sup>: 380.1412, found: 380.1417.

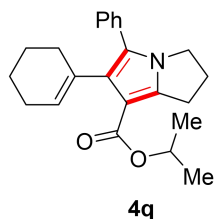

The photoredox reaction was performed according to the general procedure using **2q** with CH<sub>3</sub>CN as the solvent. The reaction was run for 48 h, the corresponding product **4q** was purified by flash column chromatography with PE/EA (10:1) to give **4q** (11.5 mg, 33% yield) as a colorless oil, (15.0 mg, 43% brsm).

**<sup>1</sup>H NMR (400 MHz, CDCl<sub>3</sub>):** δ<sub>H</sub> 7.33 (t, *J* = 6.5 Hz, 4H), 7.23 (dd, *J* = 8.7, 4.4 Hz, 1H), 5.44 (s, 1H), 5.17 (dt, *J* = 12.5, 6.2 Hz, 1H), 3.97 (t, *J* = 7.1 Hz, 2H), 3.15 (t, *J* = 7.4 Hz, 2H), 2.47 (p, *J* = 7.3 Hz, 2H), 2.26 (d, *J* = 1.8 Hz, 2H), 2.05-1.95 (m, 2H), 1.74-1.66 (m, 2H), 1.60 (dd, *J* = 7.4, 3.8 Hz, 2H), 1.29 (d, *J* = 6.2 Hz, 6H).

**<sup>13</sup>C NMR (101 MHz, CDCl<sub>3</sub>):** δ<sub>C</sub> 164.7, 144.4, 132.8, 132.6, 130.0, 128.7, 128.2, 127.2, 126.6, 125.97, 106.6, 66.1, 47.1, 30.7, 29.8, 26.7, 26.5, 25.8, 23.4, 22.5, 22.3.

**HRMS (ESI):** calcd for C<sub>23</sub>H<sub>28</sub>NO<sub>2</sub><sup>+</sup>, (M+H)<sup>+</sup>: 350.2115, found: 350.2124.

## 6. Synthetic applications

### a) Gram Scale-up Reaction

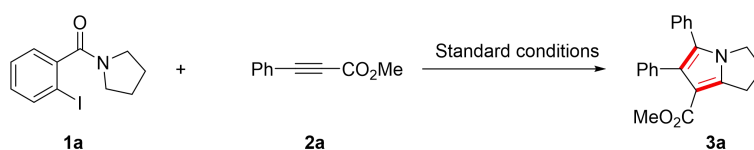

In a sealed tube, **1** (2.0 mmol), **2** (4.0 mmol), Ir(dFCF<sub>3</sub>ppy)<sub>2</sub>bpyPF<sub>6</sub> (1.0 mol %), DIPEA (4.0 mmol) were dissolved in CH<sub>3</sub>CN (10.0 mL). The reaction mixture was degassed oxygen with N<sub>2</sub> for three times at -78 °C. Subsequently, the reaction was exposed to 430 nm blue LEDs at room temperature until **1a** was completely consumed. When the reaction finished, the solvent was removed under vacuum, the residue was purified by flash column chromatography on silica gel with a eluent of ethyl acetate (EA) and petroleum ether (PE) to provide the corresponding product **3a** in 53% yield.

### b) Late-stage modification of complex molecules

#### Synthesis of **5a**:

**Synthesis of substrate L-Menthol derivative:** L-Menthol (312 mg, 2.0 mmol), DMAP (244 mg, 2 mmol) were added in DCM (20 mL) at room temperature and then stirring overnight at the same temperature. 20 ml saturated NH<sub>4</sub>Cl was added to the reaction system when the starting material was completely consumed, extracted with EA (20 ml\*3), the combined phase was washed with brine, dried over MgSO<sub>4</sub>, concentrated and purified by chromatography on silica gel to provide the L-Menthol derivative.

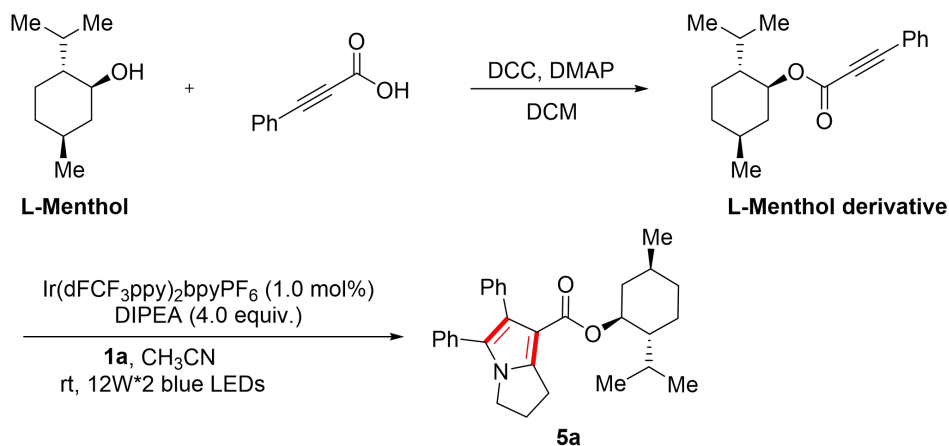

#### Characterization data of L-Menthol derivative:

**<sup>1</sup>H NMR (400 MHz, CDCl<sub>3</sub>):** δ<sub>H</sub> 7.64-7.55 (m, 2H), 7.50-7.41 (m, 1H), 7.36 (dd, *J* = 11.5, 4.4 Hz, 2H), 4.85 (td, *J* = 10.9, 4.4 Hz, 1H), 2.14-2.03 (m, 1H), 1.97 (dtd, *J* = 13.9, 7.0, 2.6 Hz, 1H), 1.75-1.65 (m, 2H), 1.56-1.42 (m, 2H), 1.16-1.01 (m, 2H), 0.89 (ddd, *J* = 15.7, 9.3, 2.0 Hz, 7H), 0.80 (d, *J* = 7.0 Hz, 3H).

**<sup>13</sup>C NMR (101 MHz, CDCl<sub>3</sub>):** δ<sub>C</sub> 153.9, 133.1, 130.6, 128.7, 119.9, 85.98, 81.1, 76.5, 47.0, 40.8, 34.3, 31.6, 26.3, 23.5, 22.1, 20.9, 16.4.

**Photoredox reaction:** In a dried sealed tube, **1a** (0.2 mmol), L-Menthol derivative (0.1 mmol),

$\text{Ir}(\text{dFCF}_3\text{ppy})_2\text{bpyPF}_6$  (1.0 mol %), DIPEA (0.4 mmol) were dissolved in  $\text{CH}_3\text{CN}$  (1.0 mL). The flask was capped and degassed oxygen with nitrogen for three times at  $-78\text{ }^\circ\text{C}$ . Subsequently, the reaction mixture was exposed to blue LEDs (425-430 nm, 10 W) at room temperature. The reaction finished when the starting materials were completely consumed (monitored by TLC). The residue was purified by flash column chromatography on silica gel with a eluent of petroleum ether (PE) and ethyl acetate (EA) to give the corresponding product **5a**.

#### Characterization data of **5a**:

**$^1\text{H}$  NMR (400 MHz,  $\text{CDCl}_3$ ):**  $\delta_{\text{H}}$  7.25 - 7.14 (m, 8H), 7.14-7.05 (m, 2H), 4.69 (td,  $J = 10.7, 4.3$  Hz, 1H), 4.03 (tdd,  $J = 14.4, 9.0, 5.4$  Hz, 2H), 3.33-3.14 (m, 2H), 2.54 (p,  $J = 7.3$  Hz, 2H), 2.08 (d,  $J = 11.6$  Hz, 1H), 1.97-1.86 (m, 1H), 1.80-1.73 (m, 1H), 1.67 (d,  $J = 11.4$  Hz, 1H), 1.59 (d,  $J = 3.1$  Hz, 1H), 1.43 (dd,  $J = 7.7, 4.4$  Hz, 1H), 1.25 (d,  $J = 5.4$  Hz, 1H), 1.12 (dd,  $J = 8.2, 5.2$  Hz, 1H), 1.03-0.95 (m, 1H), 0.87 (d,  $J = 6.5$  Hz, 3H), 0.79 (d,  $J = 7.0$  Hz, 3H), 0.68 (d,  $J = 6.9$  Hz, 3H).

**$^{13}\text{C}$  NMR (101 MHz,  $\text{CDCl}_3$ ):**  $\delta_{\text{C}}$  164.6, 144.7, 135.7, 132.1, 131.3, 129.3, 128.3, 127.4, 127.2, 127.0, 126.8, 126.2, 106.8, 72.8, 47.3, 47.1, 41.5, 34.5, 31.5, 26.8, 26.5, 25.99, 23.3, 22.2, 21.1, 16.3.

**HRMS (ESI):** calcd for  $\text{C}_{30}\text{H}_{36}\text{NO}_2^+$ ,  $(\text{M}+\text{H})^+$ : 442.2741, found: 442.2750.

#### Synthesis of **5b**:

**Synthesis of substrate Citronellol derivative:** Citronellol (312 mg, 2.0 mmol), DMAP (244 mg, 2 mmol) were added in DCM (20 mL) at room temperature and then stirring overnight at the same temperature. 20 ml saturated  $\text{NH}_4\text{Cl}$  was added to the reaction system when the starting material was completely consumed, extracted with EA (20 ml\*3), the combined phase was washed with brine, dried over  $\text{MgSO}_4$ , concentrated and purified by chromatography on silica gel with a eluent of ethyl acetate (EA) and petroleum ether (PE) to provide the corresponding substrate.

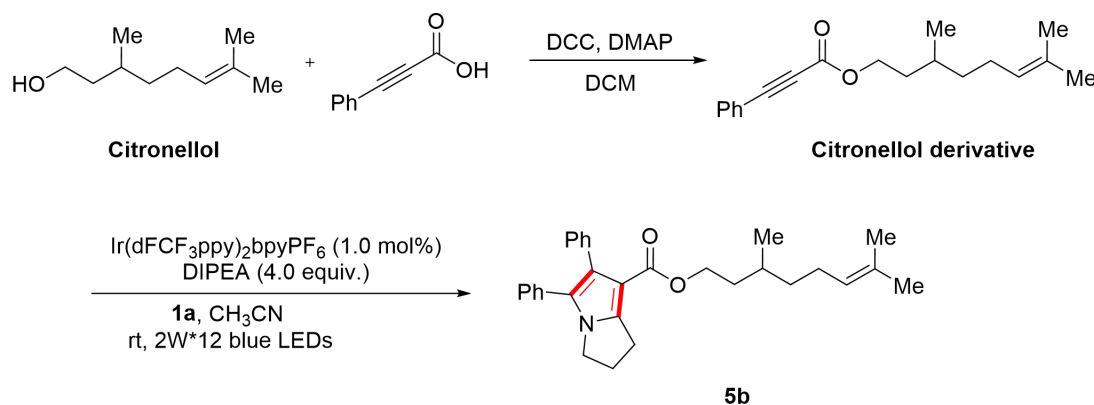

#### Characterization data of Citronellol derivative:

**$^1\text{H}$  NMR (400 MHz,  $\text{CDCl}_3$ ):**  $\delta_{\text{H}}$  7.58 (dd,  $J = 5.2, 3.2$  Hz, 2H), 7.45 (ddd,  $J = 6.6, 3.8, 1.3$  Hz, 1H), 7.40 - 7.32 (m, 2H), 5.10 (ddd,  $J = 7.1, 5.8, 1.3$  Hz, 1H), 4.38-4.16 (m, 2H), 2.14 - 1.88 (m, 2H), 1.81-1.72 (m, 1H), 1.69 (s, 3H), 1.65-1.58 (m, 4H), 1.56-1.45 (m, 1H), 1.43-1.31 (m, 1H), 1.27-1.17 (m, 1H), 0.94 (d,  $J = 6.5$  Hz, 3H).

**$^{13}\text{C}$  NMR (101 MHz,  $\text{CDCl}_3$ ):**  $\delta_{\text{C}}$  154.4, 133.1, 131.6, 130.7, 128.7, 124.6, 119.9, 86.2, 80.9, 64.8, 37.1, 35.4, 29.5, 25.9, 25.5, 19.5, 17.8.

**Photoredox reaction:** In a dried sealed tube, **1a** (0.2 mmol), L-Menthol derivative (0.1 mmol),

$\text{Ir}(\text{dFCF}_3\text{ppy})_2\text{bpyPF}_6$  (1.0 mol %), DIPEA (0.4 mmol) were dissolved in  $\text{CH}_3\text{CN}$  (1.0 mL). The flask was capped and degassed oxygen with nitrogen for three times at  $-78\text{ }^\circ\text{C}$ . Subsequently, the reaction mixture was exposed to blue LEDs (425-430 nm, 10 W) at room temperature. The reaction finished when the starting materials was completely consumed (monitored by TLC). The residue was purified by flash column chromatography on silica gel with a eluent of petroleum ether (PE) and ethyl acetate (EA) to give the corresponding products.

**Characterization data of 5b:**

$^1\text{H NMR}$  (400 MHz,  $\text{CDCl}_3$ ):  $\delta_{\text{H}}$  7.17-7.07 (m, 8H), 7.06-6.99 (m, 2H), 5.00 (t,  $J = 7.1$  Hz, 1H), 4.14 – 4.00 (m, 2H), 3.97 (t,  $J = 7.1$  Hz, 2H), 3.15 (t,  $J = 7.4$  Hz, 2H), 2.47 (p,  $J = 7.3$  Hz, 2H), 1.95-1.74 (m, 2H), 1.60 (s, 3H), 1.52 (s, 3H), 1.53-1.45 (m, 1H), 1.35 (dd,  $J = 12.6, 6.1$  Hz, 1H), 1.25 (d,  $J = 6.7$  Hz, 1H), 1.21-1.17 (m, 1H), 1.09-0.98 (m, 1H), 0.76 (d,  $J = 6.5$  Hz, 3H).

$^{13}\text{C NMR}$  (101 MHz,  $\text{CDCl}_3$ ):  $\delta_{\text{C}}$  165.2, 144.7, 135.6, 132.1, 131.3, 131.2, 129.3, 128.3, 127.5, 127.2, 127.1, 126.9, 126.3, 124.93, 106.4, 61.7, 47.2, 37.2, 35.8, 29.4, 26.8, 26.6, 25.9, 25.5, 19.3, 17.8.

**HRMS (ESI):** calcd for  $\text{C}_{30}\text{H}_{36}\text{NO}_2^+$ ,  $(\text{M}+\text{H})^+$ : 442..2741, found: 442.2739.

**Synthesis of 5c:**

**Synthesis of substrate Geraniol derivative:** Geraniol (308 mg, 2.0 mmol), DMAP (244 mg, 2 mmol) were added in DCM (20 mL) at room temperature and then stirring overnight at the same temperature. 20 ml saturated  $\text{NH}_4\text{Cl}$  was added to the reaction system when the starting material was completely consumed, extracted with EA (20 ml\*3), the combined phase was washed with brine, dried over  $\text{MgSO}_4$ , concentrated and purified by chromatography on silica gel to provide the Geraniol derivative.

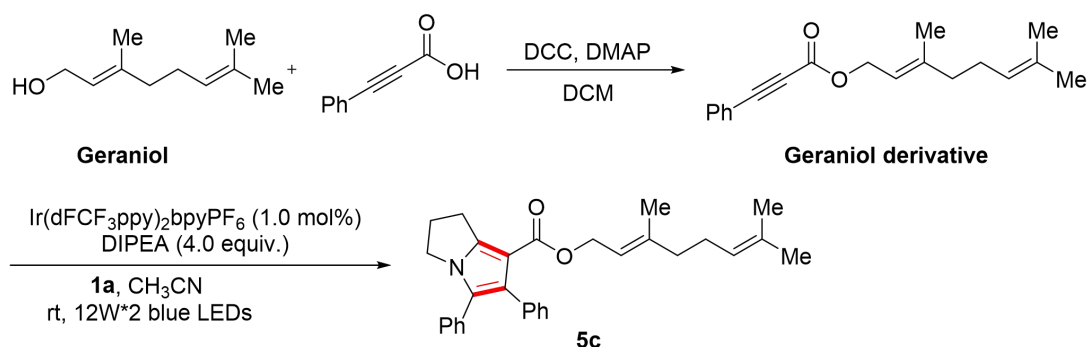

**Characterization data of Geraniol derivative:**

$^1\text{H NMR}$  (400 MHz,  $\text{CDCl}_3$ ):  $\delta_{\text{H}}$  7.62-7.50 (m, 2H), 7.41 (ddd,  $J = 6.5, 3.8, 1.3$  Hz, 1H), 7.37-7.29 (m, 2H), 5.41 (td,  $J = 7.2, 1.1$  Hz, 1H), 5.14-5.02 (m, 1H), 4.74 (d,  $J = 7.3$  Hz, 2H), 2.22-1.99 (m, 4H), 1.73 (s, 3H), 1.67 (s, 3H), 1.59 (s, 3H).

$^{13}\text{C NMR}$  (101 MHz,  $\text{CDCl}_3$ ):  $\delta_{\text{C}}$  154.0, 143.5, 132.9, 131.9, 130.6, 128.6, 123.7, 119.7, 117.5, 86.1, 80.8, 62.8, 39.5, 26.3, 25.7, 17.7, 16.5.

**Photoredox reaction:** In a dried sealed tube, 1a (0.2 mmol), Geraniol derivative (0.1 mmol),  $\text{Ir}(\text{dFCF}_3\text{ppy})_2\text{bpyPF}_6$  (1.0 mol %), DIPEA (0.4 mmol) were dissolved in  $\text{CH}_3\text{CN}$  (1.0 mL). The flask was capped and degassed oxygen with nitrogen for three times at  $-78\text{ }^\circ\text{C}$ . Subsequently, the reaction mixture was exposed to blue LEDs (425-430 nm, 10 W) at room temperature. The reaction finished when the starting materials was completely consumed (monitored by TLC). The residue was purified

by flash column chromatography on silica gel with a eluent of petroleum ether (PE) and ethyl acetate (EA) to give the corresponding product **5c**.

**<sup>1</sup>H NMR (400 MHz, CDCl<sub>3</sub>):**  $\delta_H$  7.17-7.07 (m, 8H), 7.06-7.00 (m, 2H), 5.31-5.15 (m, 1H), 5.02 (dd,  $J = 9.5, 4.0$  Hz, 1H), 4.54 (d,  $J = 6.8$  Hz, 2H), 3.96 (t,  $J = 7.1$  Hz, 2H), 3.15 (t,  $J = 7.4$  Hz, 2H), 2.46 (p,  $J = 7.3$  Hz, 2H), 2.01 (dd,  $J = 15.1, 6.7$  Hz, 2H), 1.92 (dd,  $J = 12.7, 7.5$  Hz, 2H), 1.61 (s, 3H), 1.57 (s, 3H), 1.54 (s, 3H).

**<sup>13</sup>C NMR (101 MHz, CDCl<sub>3</sub>):**  $\delta_C$  165.1, 144.8, 140.98, 135.5, 132.2, 131.8, 131.2, 129.4, 128.3, 127.5, 127.3, 127.1, 126.9, 126.2, 124.1, 119.4, 106.4, 60.3, 47.2, 39.6, 26.8, 26.6, 26.5, 25.8, 17.8, 16.6.

**HRMS (ESI):** calcd for C<sub>30</sub>H<sub>33</sub>NNaO<sub>2</sub><sup>+</sup>, (M+Na)<sup>+</sup>: 462.2404, found: 462.2411.

### Synthesis of **5d**:

**Synthesis of substrate Nerol derivative:** Nerol (308 mg, 2.0 mmol), DMAP (244 mg, 2 mmol) were added in DCM (20 mL) at room temperature and then stirring overnight at the same temperature. 20 ml saturated NH<sub>4</sub>Cl was added to the reaction system when the starting material was completely consumed, extracted with EA (20 ml\*3), the combined phase was washed with brine, dried over MgSO<sub>4</sub>, concentrated and purified by chromatography on silica gel to provide the Nerol derivative.

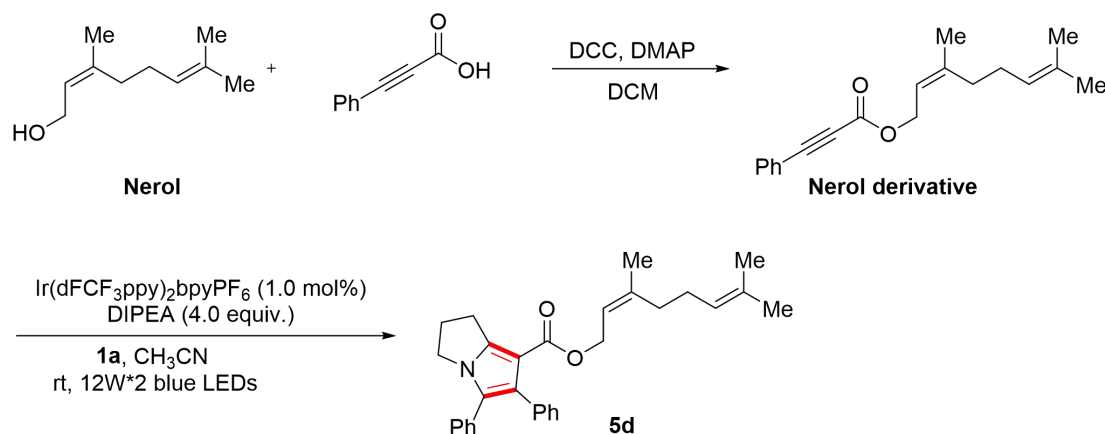

### Characterization data of Nerol derivative:

**<sup>1</sup>H NMR (400 MHz, CDCl<sub>3</sub>):**  $\delta_H$  7.61-7.51 (m, 2H), 7.44 (t,  $J = 7.4$  Hz, 1H), 7.36 (t,  $J = 7.5$  Hz, 2H), 5.43 (t,  $J = 7.3$  Hz, 1H), 5.11 (t,  $J = 6.3$  Hz, 1H), 4.72 (d,  $J = 7.4$  Hz, 2H), 2.21-2.04 (m, 4H), 1.79 (s, 3H), 1.69 (s, 3H), 1.61 (s, 3H).

**<sup>13</sup>C NMR (101 MHz, CDCl<sub>3</sub>):**  $\delta_C$  154.2, 144.0, 133.1, 132.5, 130.7, 128.7, 123.6, 119.9, 118.4, 86.2, 80.8, 62.7, 32.3, 26.7, 25.8, 23.7, 17.8.

**Photoredox reaction:** In a dried sealed tube, **1a** (0.2 mmol), Nerol derivative (0.1 mmol), Ir(dFCF<sub>3</sub>ppy)<sub>2</sub>bpyPF<sub>6</sub> (1.0 mol %), DIPEA (0.4 mmol) were dissolved in CH<sub>3</sub>CN (1.0 mL). The flask was capped and degassed oxygen with nitrogen for three times at -78 °C. Subsequently, the reaction mixture was exposed to blue LEDs (425-430 nm, 10 W) at room temperature. The reaction finished when the starting materials was completely consumed (monitored by TLC). The residue was purified by flash column chromatography on silica gel with a eluent of petroleum ether (PE) and ethyl acetate (EA) to give the corresponding product **5d**.

### Characterization data of **5d**:

**<sup>1</sup>H NMR (400 MHz, CDCl<sub>3</sub>):**  $\delta_H$  7.25-7.15 (m, 8H), 7.14-7.08 (m, 2H), 5.30 (dd,  $J = 7.0, 5.9$  Hz, 1H), 5.14-5.01 (m, 1H), 4.60 (d,  $J = 7.0$  Hz, 2H), 4.03 (t,  $J = 7.1$  Hz, 2H), 3.22 (t,  $J = 7.4$  Hz, 2H), 2.58-2.47 (m, 2H), 2.10-2.01 (m, 4H), 1.73 (d,  $J = 1.0$  Hz, 3H), 1.66 (s, 3H), 1.58 (s, 3H).

**<sup>13</sup>C NMR (101 MHz, CDCl<sub>3</sub>):**  $\delta_C$  165.0, 144.8, 141.0, 135.5, 132.1, 132.1, 131.2, 129.3, 128.3, 127.5, 127.3, 127.0, 126.8, 126.2, 123.9, 120.3, 106.3, 60.1, 47.2, 32.31, 26.8, 26.8, 26.5, 25.8, 23.6, 17.8.

**HRMS (ESI):** calcd for C<sub>30</sub>H<sub>33</sub>NNaO<sub>2</sub><sup>+</sup>, (M+Na)<sup>+</sup>: 462.2404, found: 462.2401.

### Synthesis of 5e:

**Synthesis of substrate Perillyl alcohol derivative:** Perillyl alcohol (312 mg, 2.0 mmol), DMAP (244 mg, 2 mmol) were added in DCM (20 mL) at room temperature and then stirring overnight at the same temperature. 20 ml saturated NH<sub>4</sub>Cl was added to the reaction system when the starting material was completely consumed, extracted with EA (20 ml\*3), the combined phase was washed with brine, dried over MgSO<sub>4</sub>, concentrated and purified by chromatography on silica gel to provide the corresponding substrate.

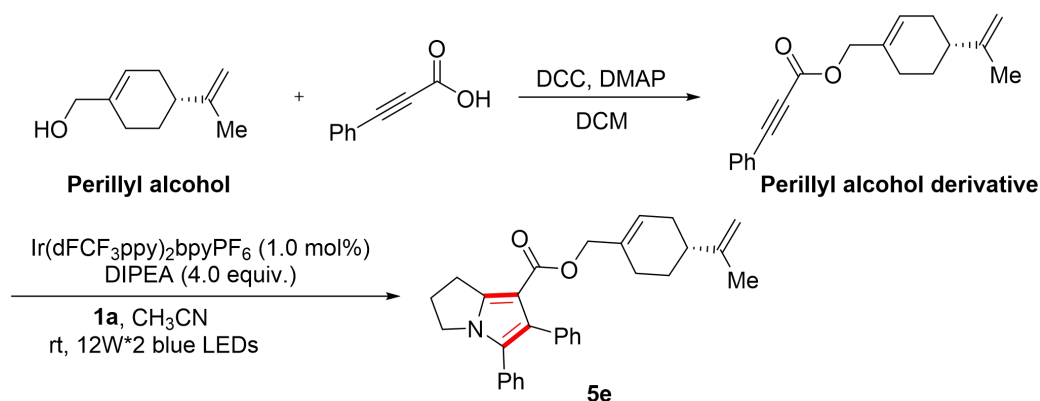

### Characterization data of Perillyl alcohol derivative:

**<sup>1</sup>H NMR (400 MHz, CDCl<sub>3</sub>):**  $\delta_H$  7.48 (dd,  $J = 5.2, 3.3$  Hz, 2H), 7.39-7.31 (m, 1H), 7.30-7.22 (m, 2H), 5.75 (s, 1H), 4.70-4.60 (m, 2H), 4.53 (s, 2H), 2.16- 2.01 (m, 4H), 1.96-1.84 (m, 1H), 1.82- 1.72 (m, 1H), 1.65 (s, 3H), 1.42 (tt,  $J = 12.6, 8.6$  Hz, 1H).

**<sup>13</sup>C NMR (101 MHz, CDCl<sub>3</sub>):**  $\delta_C$  154.0, 149.4, 133.0, 131.9, 130.7, 128.6, 127.2, 119.7, 108.9, 86.3, 80.7, 70.0, 40.7, 30.5, 27.3, 26.5, 20.8.

**Photoredox reaction:** In a dried sealed tube, **1a** (0.2 mmol), Perillyl alcohol derivative (0.1 mmol), Ir(dFCF<sub>3</sub>ppy)<sub>2</sub>bpyPF<sub>6</sub> (1.0 mol %), DIPEA (0.4 mmol) were dissolved in CH<sub>3</sub>CN (1.0 mL). The flask was capped and degassed oxygen with nitrogen for three times at -78 °C. Subsequently, the reaction mixture was exposed to blue LEDs (425-430 nm, 10 W) at room temperature. The reaction finished when the starting materials was completely consumed (monitored by TLC). The residue was purified by flash column chromatography on silica gel with a eluent of petroleum ether (PE) and ethyl acetate (EA) to give the corresponding product **5e**.

### Characterization data of 5e:

**<sup>1</sup>H NMR (400 MHz, CDCl<sub>3</sub>):**  $\delta_H$  7.25-7.14 (m, 8H), 7.13-7.07 (m, 2H), 5.59 (d,  $J = 3.1$  Hz, 1H), 4.73-4.63 (m, 2H), 4.55-4.43 (m, 2H), 4.04 (t,  $J = 7.1$  Hz, 2H), 3.24 (t,  $J = 7.5$  Hz, 2H), 2.61-2.45 (m, 2H), 2.09 (dt,  $J = 12.5, 7.3$  Hz, 2H), 1.97-1.85 (m, 3H), 1.80-1.71 (m, 4H), 1.40 (ddd,  $J = 20.2, 12.4, 8.4$  Hz, 1H).

**<sup>13</sup>C NMR (101 MHz, CDCl<sub>3</sub>):**  $\delta_C$  165.0, 150.0, 144.9, 135.7, 133.3, 132.1, 131.2, 129.3, 128.3, 127.5, 127.3, 127.1, 126.9, 126.3, 124.6, 108.7, 106.3, 67.5, 47.2, 41.1, 30.6, 27.6, 26.8, 26.6, 26.5, 20.9.

**HRMS (ESI):** calcd for C<sub>30</sub>H<sub>32</sub>NO<sub>2</sub><sup>+</sup>, (M+H)<sup>+</sup>: 438.2428, found: 438.2427.



## 7. Mechanistic Studies

### a) Control experiment

To illustrate the mechanism, control experiment was performed: In a dried sealed tube, **6** (0.1 mmol), **ethyl acrylate** (0.2 mmol), Ir(dFCF<sub>3</sub>ppy)<sub>2</sub>bpyPF<sub>6</sub> (1.0 mol %), DIPEA (0.4 mmol) were dissolved in CH<sub>3</sub>CN (1.0 mL). The reaction was capped and degassed oxygen with N<sub>2</sub> for three times at -78 °C. Subsequently, the reaction flask was exposed to 425-430 nm blue leds. After 24 hours, the mixture was extracted with DCM (5 mL\*3). The combined solvent were dried over Na<sub>2</sub>SO<sub>4</sub>, filtered, and detected with GC, there was no desired product **3a** detected, which demonstrate the activation of C-I bond are crucial to the successful transformation of the procedure.

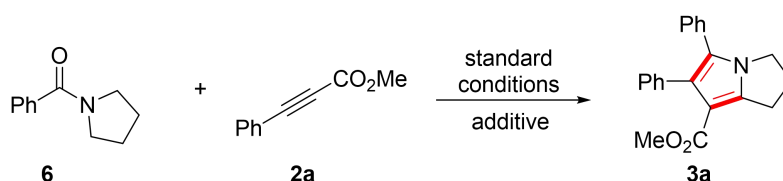

### b) Radical inhibition experiments

In a dried sealed tube, **1a** (0.1 mmol), **2a** (0.2 mmol), Ir(dFCF<sub>3</sub>ppy)<sub>2</sub>bpyPF<sub>6</sub> (1.0 mol %), DIPEA (0.4 mmol), TEMPO (2,2,6,6-tetramethyl-1-piperidinyloxy) (0.2 mmol) were dissolved in CH<sub>3</sub>CN (1.0 mL). The reaction was degassed with N<sub>2</sub> for three times at -78 °C. Subsequently, the reaction flask was exposed to 425-430 nm blue LEDs at room temperature. 36 hours later, the reaction was stopped, **3a** was isolated in 8% yield and there was no other radical product isolated from the reaction mixture. The yield was obviously decreased to 8%, which indicate this transformation was radical involved through a single-electron transfer process.

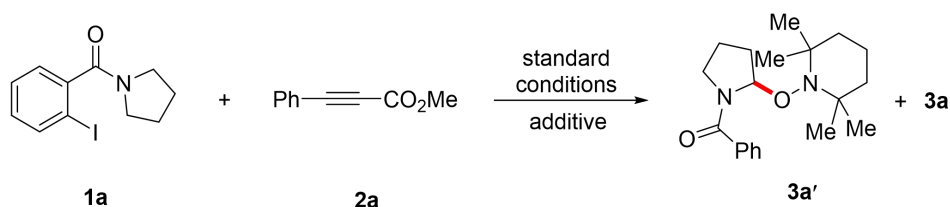

### c) Radical addition procedure

To illustrate the mechanism, the radical addition experiment was conducted: In a dried sealed tube, **1k** (0.1 mmol), **2a** (0.2 mmol), Ir(dFCF<sub>3</sub>ppy)<sub>2</sub>bpyPF<sub>6</sub> (1.0 mol %), DIPEA (0.4 mmol) were dissolved in CH<sub>3</sub>CN (1.0 mL). The flask was capped and degassed oxygen with N<sub>2</sub> for three times at -78 °C. Subsequently, the reaction flask was exposed to 425-430 nm blue leds until the starting material completely consumed and quenched with 4 mL saturated NH<sub>4</sub>Cl. The mixture was extracted with DCM (5 mL\*3). The combined solvent were dried over Na<sub>2</sub>SO<sub>4</sub> and filtered. The filtrate was concentrated and purification by chromatography on silica gel with a eluent of petroleum ether (PE) and ethyl acetate (EA) to afford the alkylation product **3k** in 58% yield, and the radical addition product **7** was also isolated in 17% yield. <sup>1</sup>H NMR (400 MHz, CDCl<sub>3</sub>) of **7**: δ<sub>H</sub> 7.56 (d, *J* = 7.3 Hz, 2H), 7.44 (d, *J* = 7.2 Hz, 1H), 7.36 (t, *J* = 7.5 Hz, 2H), 7.33-7.27 (m, 5H), 7.23-7.17 (m, 3H), 6.89 (dd, *J* = 15.0, 7.9 Hz, 2H), 5.04 (dd, *J* = 15.1, 8.4 Hz, 1H), 3.50 (s, 3H), 3.01-2.82 (m, 2H), 2.74 (ddd, *J* = 13.5, 9.1, 6.6 Hz, 1H), 2.46-2.30 (m, 1H).

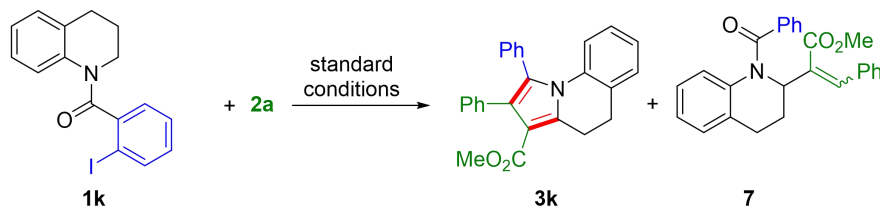

7.566  
7.548  
7.448  
7.430  
7.383  
7.364  
7.346  
7.330  
7.316  
7.312  
7.307  
7.301  
7.289  
7.268  
7.224  
7.221  
7.201  
7.191  
7.183  
7.176  
6.922  
6.903  
6.885  
6.865  
5.074  
5.053  
5.036  
5.015  
3.497  
2.973  
2.950  
2.940  
2.932  
2.917  
2.898  
2.880  
2.867  
2.846  
2.834  
2.796  
2.779  
2.763  
2.756  
2.747  
2.740  
2.730  
2.724  
2.707  
2.411  
2.399  
2.393  
2.379  
2.368  
2.359  
2.345  
2.340  
2.327

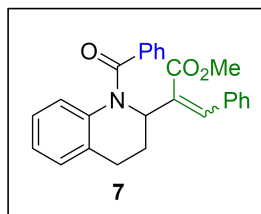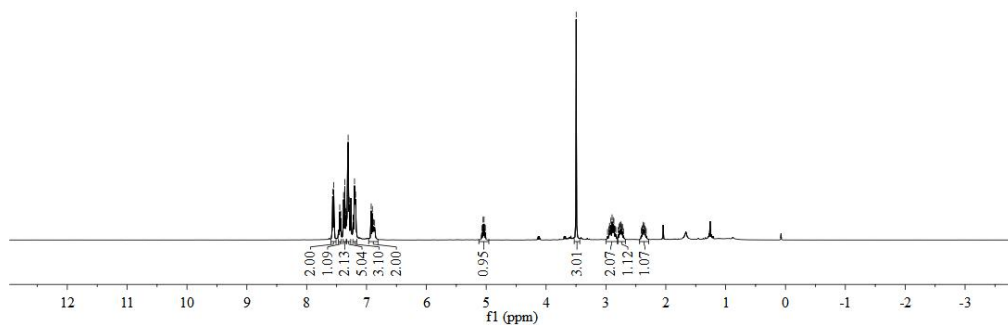

#### d) Deuterium labeling experiment to rule out 1,5-HAT of intermolecular

To illustrate the mechanism, the radical addition experiment was conducted: In a dried sealed tube, **d<sub>2</sub>-1k** (0.1 mmol), **2a** (0.2 mmol), Ir(dFCF<sub>3</sub>ppy)<sub>2</sub>bpyPF<sub>6</sub> (1.0 mol %), DIPEA (0.4 mmol) were dissolved in CH<sub>3</sub>CN (1.0 mL). The flask was capped and degassed oxygen with N<sub>2</sub> for three times at -78 °C. Subsequently, the reaction flask was exposed to 425-430 nm blue leds until the starting material completely consumed and quenched with 4 mL saturated NH<sub>4</sub>Cl. The mixture was extracted with DCM (5 mL\*3). The combined solvent were dried over Na<sub>2</sub>SO<sub>4</sub> and filtered. The filtrate was concentrated and purification by chromatography on silica gel with a eluent of petroleum ether (PE) and ethyl acetate (EA) to afford the alkylation product **d<sub>1</sub>-3k** in 49% yield. <sup>1</sup>H NMR (400 MHz, CDCl<sub>3</sub>) δ 7.34 (dd, *J* = 11.8, 4.7 Hz, 1H), 7.29 – 7.26 (m, 1H), 7.24 (dd, *J* = 6.1, 2.3 Hz, 1H), 7.17 (d, *J* = 7.7 Hz, 1H), 7.06 – 7.00 (m, 1H), 6.92 (t, *J* = 7.6 Hz, 1H), 6.81 – 6.70 (m, 1H), 3.56 (s, 1H), 2.80 (dd, *J* = 10.1, 4.7 Hz, 1H), 2.64 – 2.49 (m, 1H), 2.06 – 1.94 (m, 1H)

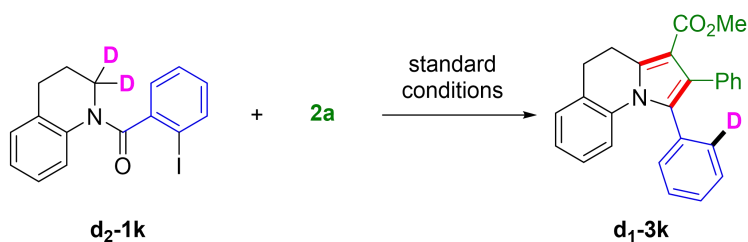

7.288  
7.285  
7.268  
7.247  
7.220  
7.214  
7.197  
7.179  
7.174  
7.164  
7.158  
7.108  
7.089  
6.975  
6.959  
6.956  
6.940  
6.938  
6.870  
6.851  
6.833  
6.705  
6.687  
6.660

3.490  
2.748  
2.734  
2.721  
2.712  
2.478  
1.966  
1.961  
1.946  
1.933  
1.926  
1.912

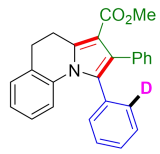

**d<sub>1</sub>-3k**

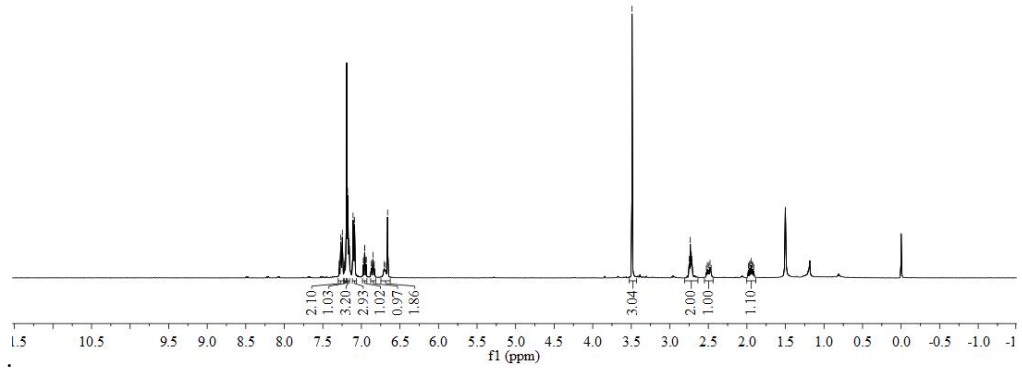

## 8. Reference

1. S. Sarkar, W. Sidhant, X. Jia, V. Gevorgyan, *Chem* **2022**, *8*, 3096-3108.
2. R. Guo, H. Xiao, S. Li, Y. Luo, J. Bai, M. Zhang, Y. Guo, X. Qi, G. Zhang, *Angew. Chem. Int. Ed.*, **2022**, *61*, e202208232.
3. J. B. McManus, N. P. R. Onuska, D. A. Nicewicz, *J. Am. Chem. Soc.*, **2018**, *140*, 9056-9060.
4. Z. Han, G. Liu, X. Zhang, A. Li, X. Dong, X. Zhang. *Org. Lett.* **2019**, *21*, 3923-3926.

## 9. The crystallographic data

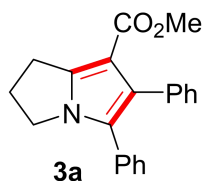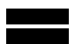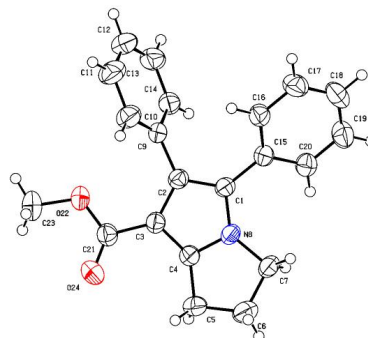

|                                     |                                                  |                                 |                                                  |
|-------------------------------------|--------------------------------------------------|---------------------------------|--------------------------------------------------|
| Identification code                 | CCDC 2330634                                     |                                 |                                                  |
| Bond precision:                     | C-C = 0.0045 Å                                   | Wavelength=1.54184              |                                                  |
| Cell:                               | a=14.0601(3)                                     | b=15.6594(4)                    | c=7.7115(2)                                      |
|                                     | alpha=90                                         | beta=101.332(2)                 | gamma=90                                         |
| Temperature:                        | 301 K                                            |                                 |                                                  |
|                                     | Calculated                                       |                                 | Reported                                         |
| Volume                              | 1664.76(7)                                       |                                 | 1664.76(7)                                       |
| Space group                         | C c                                              |                                 | C c                                              |
| Hall group                          | C -2yc                                           |                                 | C -2yc                                           |
| Moiety formula                      | C <sub>21</sub> H <sub>19</sub> N O <sub>2</sub> |                                 | C <sub>21</sub> H <sub>19</sub> N O <sub>2</sub> |
| Sum formula                         | C <sub>21</sub> H <sub>19</sub> N O <sub>2</sub> |                                 | C <sub>21</sub> H <sub>19</sub> N O <sub>2</sub> |
| Mr                                  | 317.37                                           |                                 | 317.37                                           |
| D <sub>x</sub> , g cm <sup>-3</sup> | 1.266                                            |                                 | 1.266                                            |
| Z                                   | 4                                                |                                 | 4                                                |
| Mu (mm <sup>-1</sup> )              | 0.644                                            |                                 | 0.644                                            |
| F <sub>000</sub>                    | 672.0                                            |                                 | 672.0                                            |
| F <sub>000</sub> '                  | 673.94                                           |                                 | 673.94                                           |
| h,k,l <sub>max</sub>                | 17,19,9                                          |                                 | 17,19,9                                          |
| N <sub>ref</sub>                    | 3505[ 1757]                                      |                                 | 2454                                             |
| T <sub>min</sub> ,T <sub>max</sub>  |                                                  |                                 |                                                  |
| T <sub>min</sub> '                  |                                                  |                                 |                                                  |
| Correction method=                  | Not given                                        |                                 |                                                  |
| Data completeness=                  | 1.40/0.70                                        | Theta(max)= 76.343              |                                                  |
| R(reflections)=                     | 0.0341( 2319)                                    | wR2(reflections)= 0.0988( 2454) |                                                  |
| S =                                 | 1.095                                            | Npar= 219                       |                                                  |

## 10. Spectra for Substrates and Products Product Characterization

### L-Menthol derivative, $^1\text{H}+^{13}\text{C}$ NMR

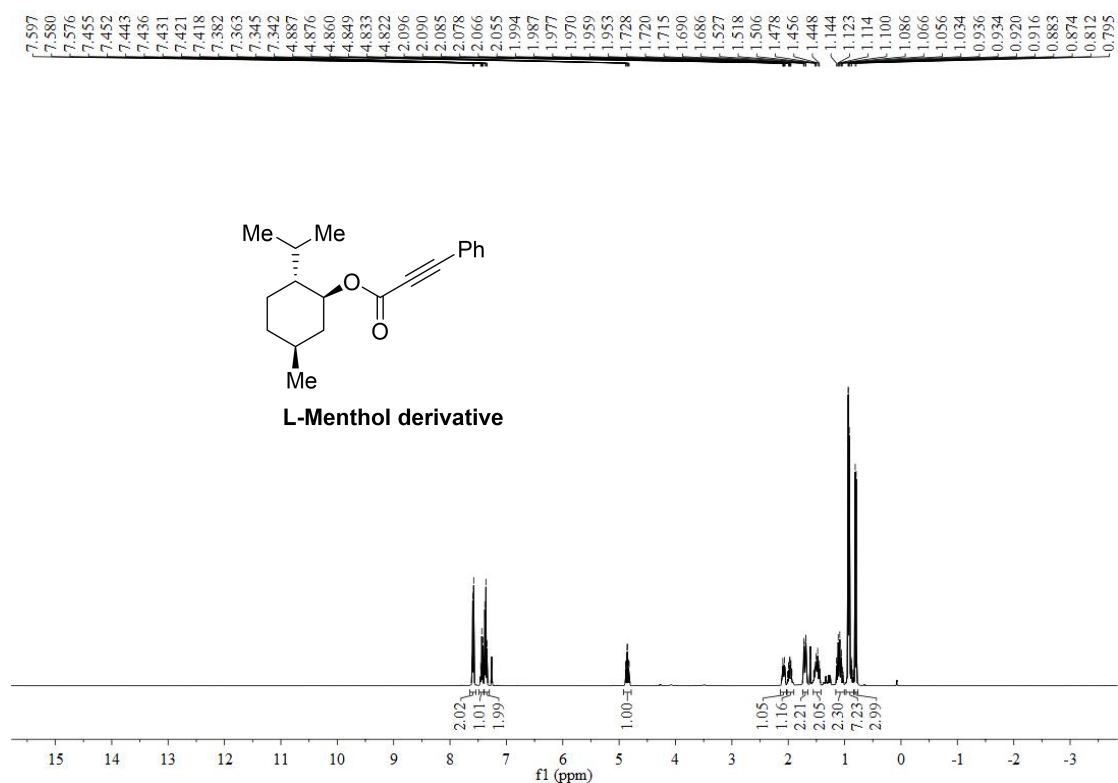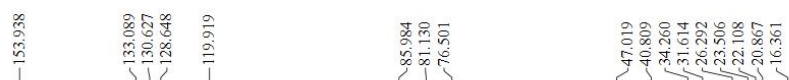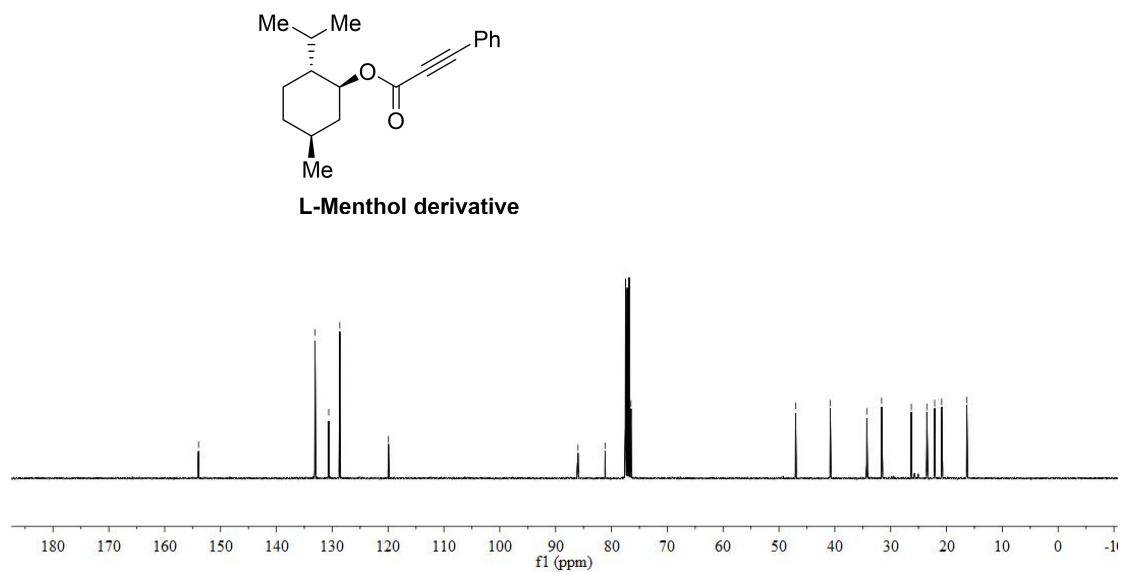

Citronellol derivative,  $^1\text{H}+^{13}\text{C}$  NMR

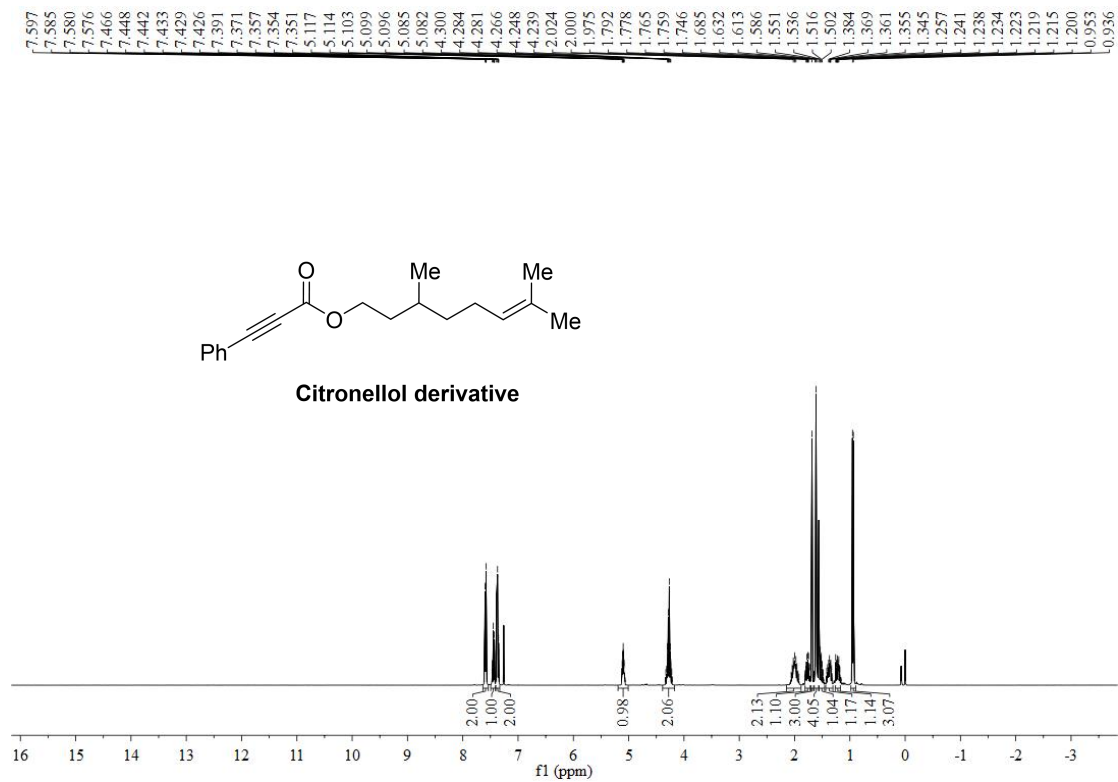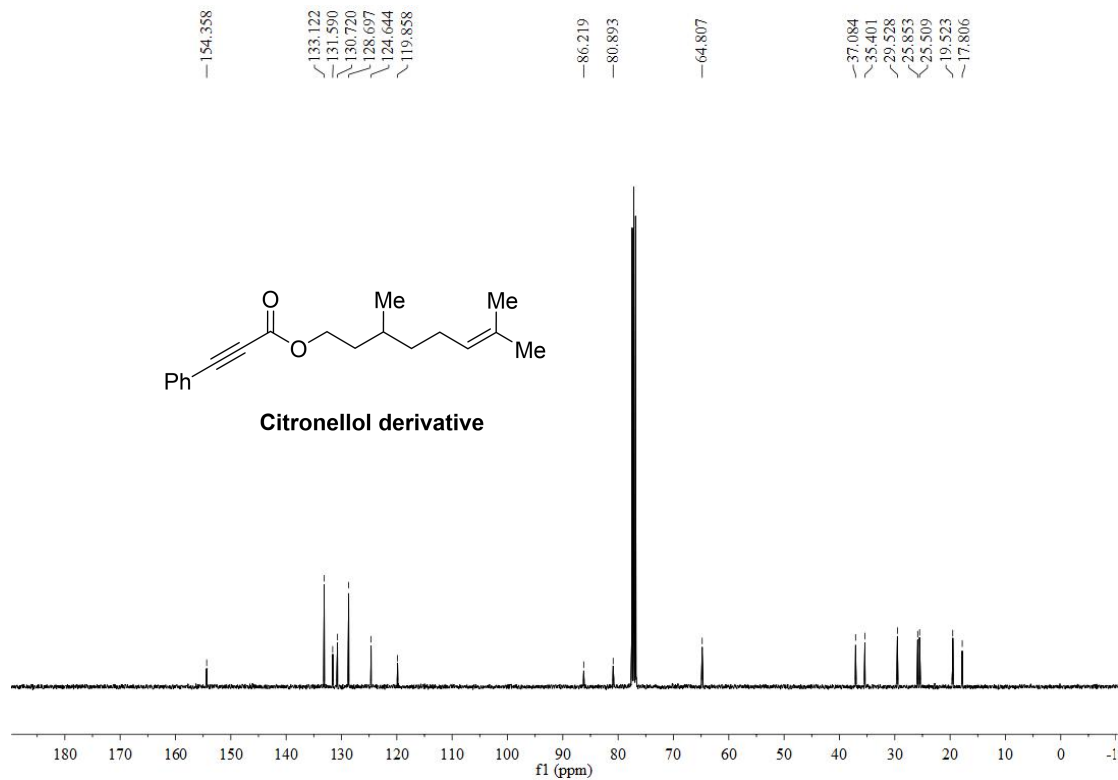

Geraniol derivative,  $^1\text{H}+^{13}\text{C}$  NMR

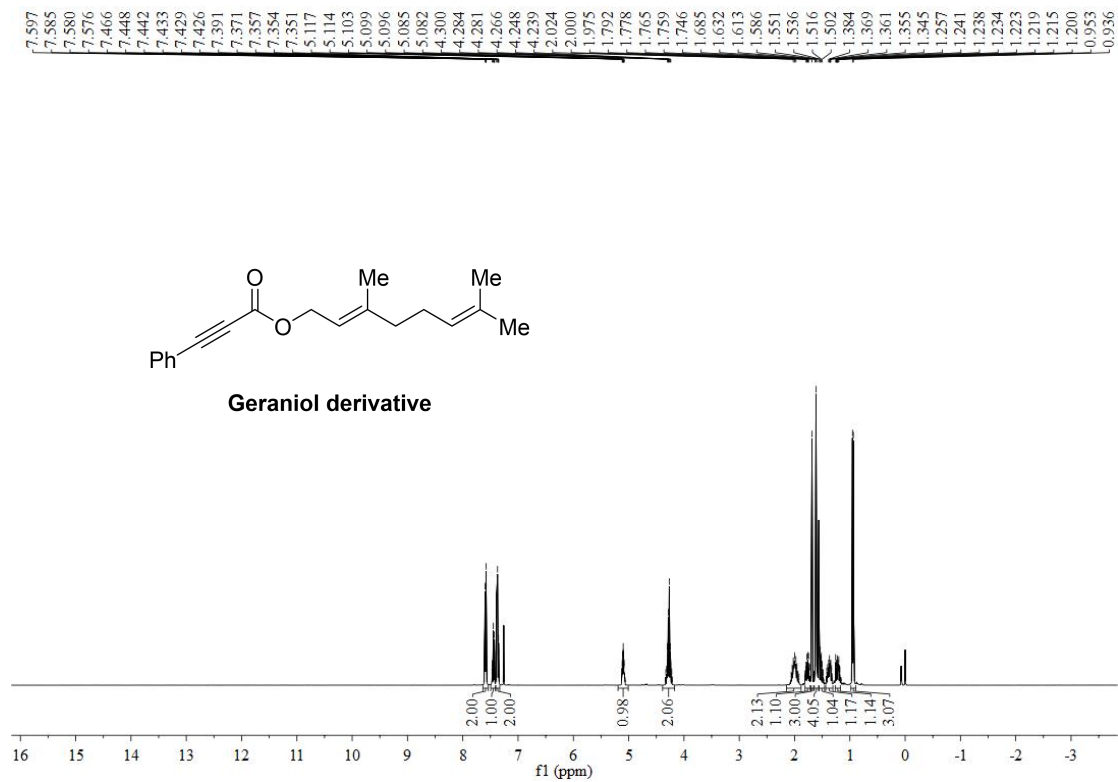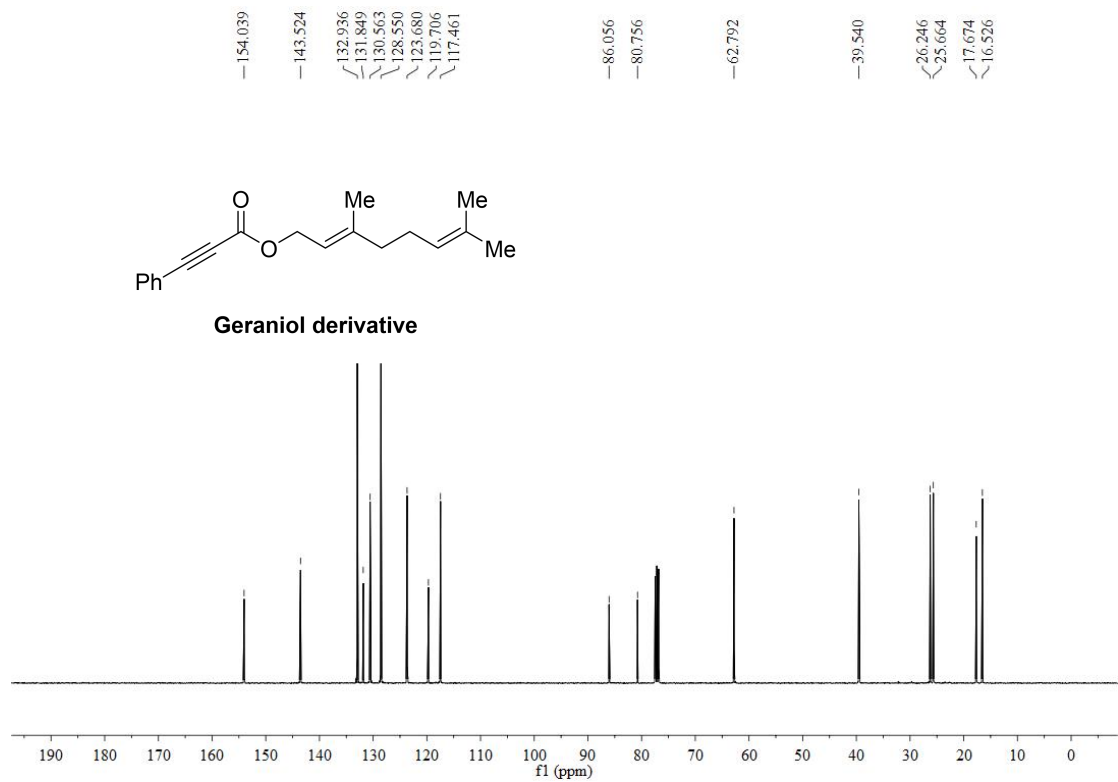



Nerol derivative,  $^1\text{H}+^{13}\text{C}$  NMR

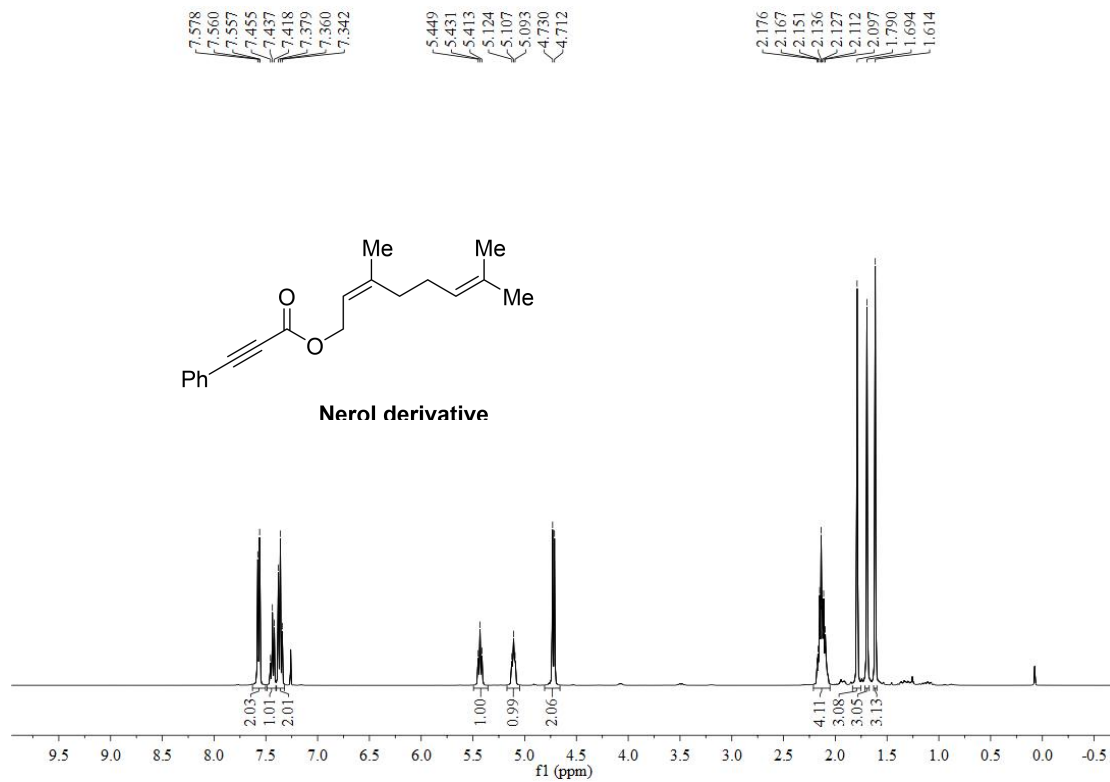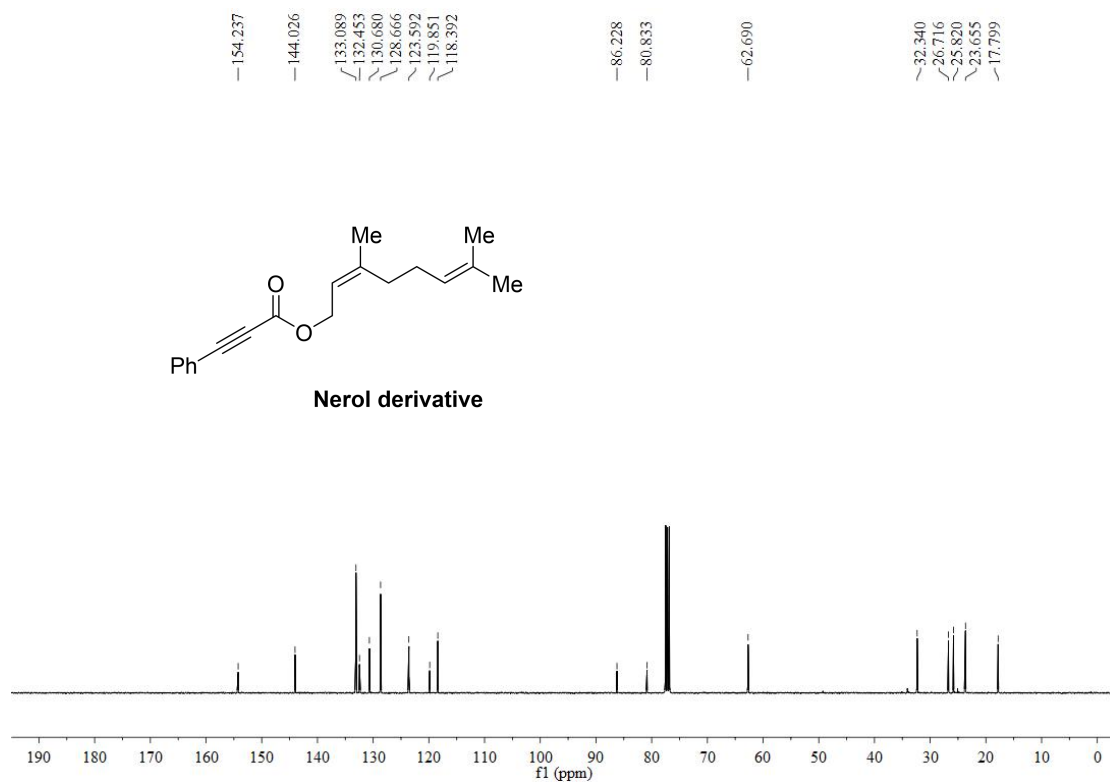

Perillyl alcohol derivative,  $^1\text{H}+^{13}\text{C}$  NMR

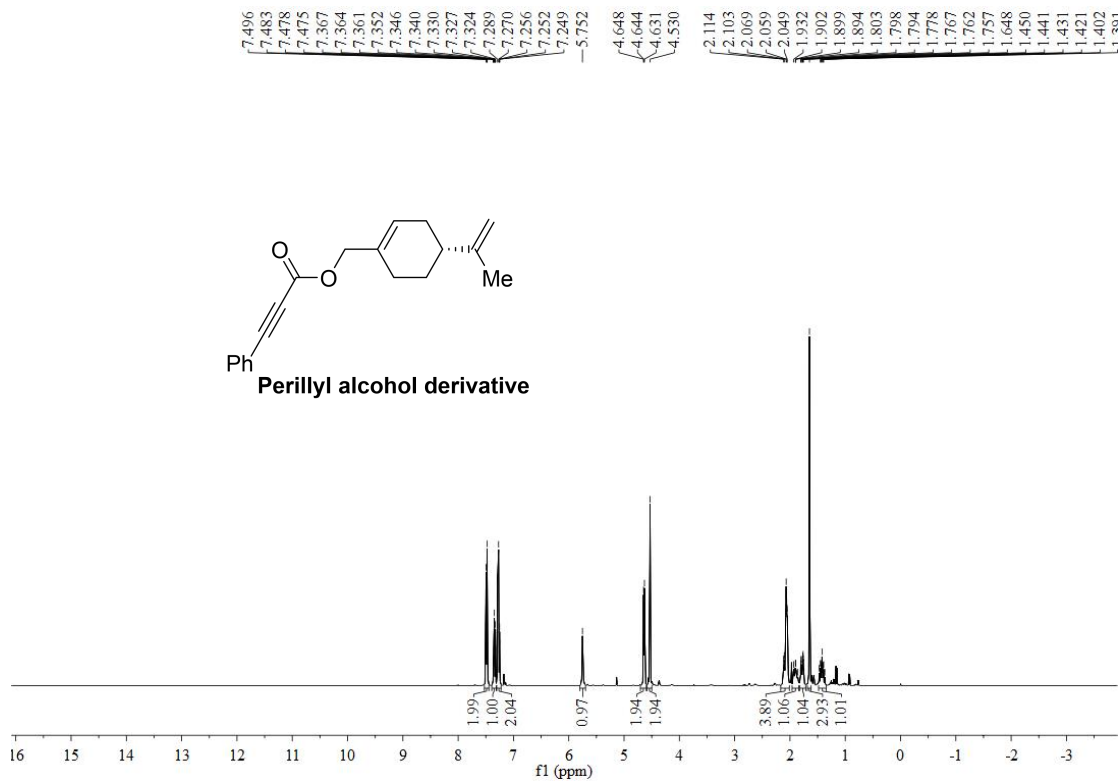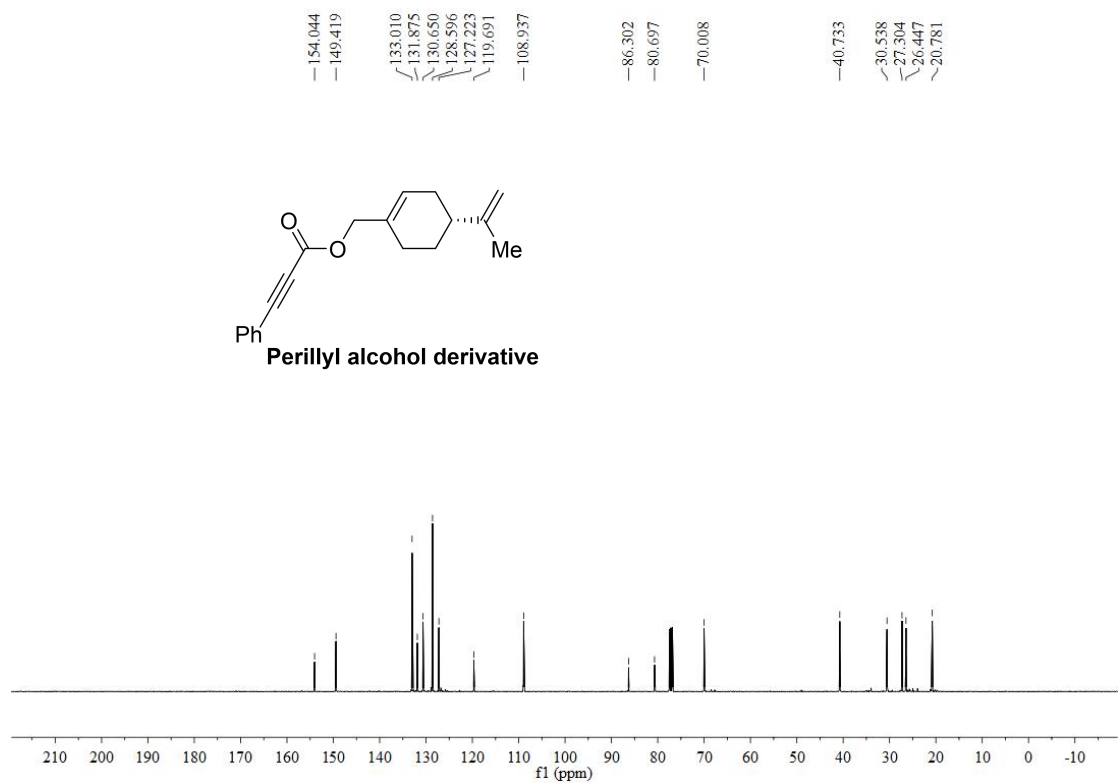

**3a,  $^1\text{H}+^{13}\text{C}$  NMR**

7.174  
7.158  
7.147  
7.125  
7.113  
7.109  
7.103  
7.096  
7.042  
7.037  
7.021

3.971  
3.953  
3.935  
-3.597  
3.155  
3.137  
3.118  
2.487  
2.469  
2.451  
2.433  
2.414

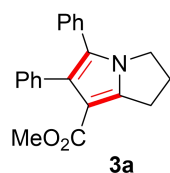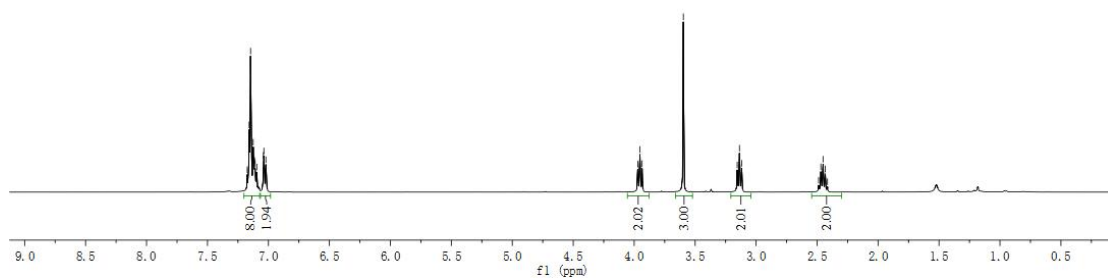

165.522  
144.809  
135.413  
132.034  
131.093  
129.311  
128.311  
127.505  
127.181  
127.115  
126.878  
126.284  
105.950

50.669  
47.179  
26.738  
26.495

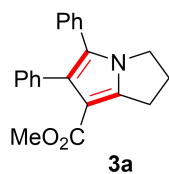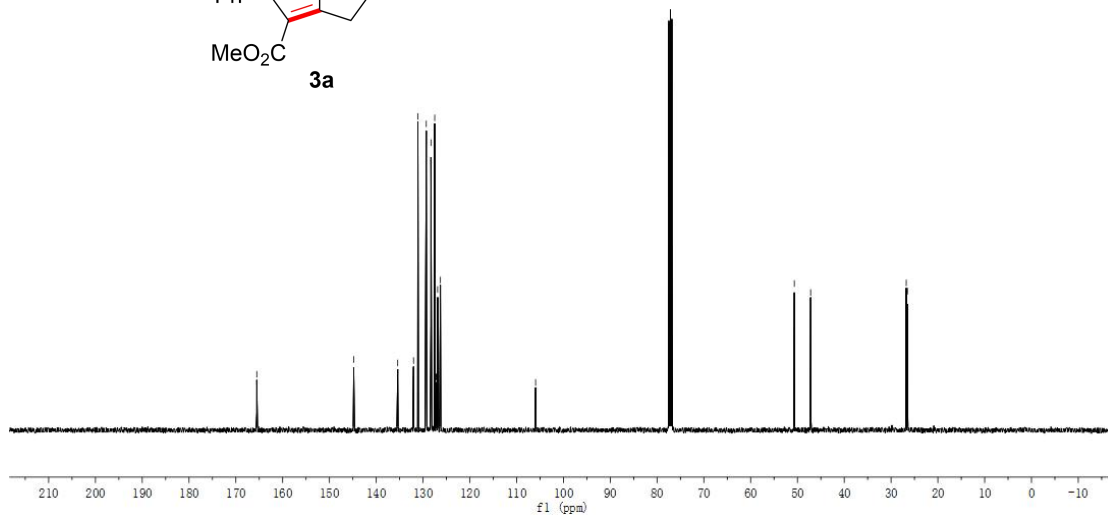

**3b,  $^1\text{H}+^{13}\text{C}$  NMR**

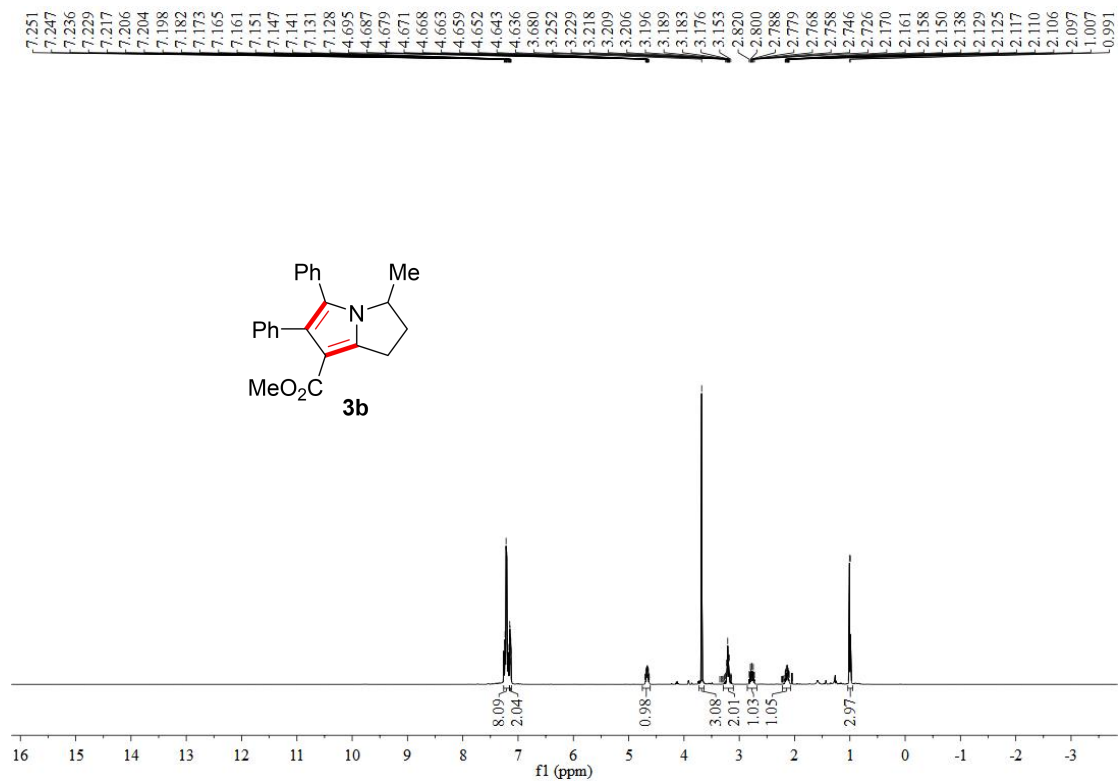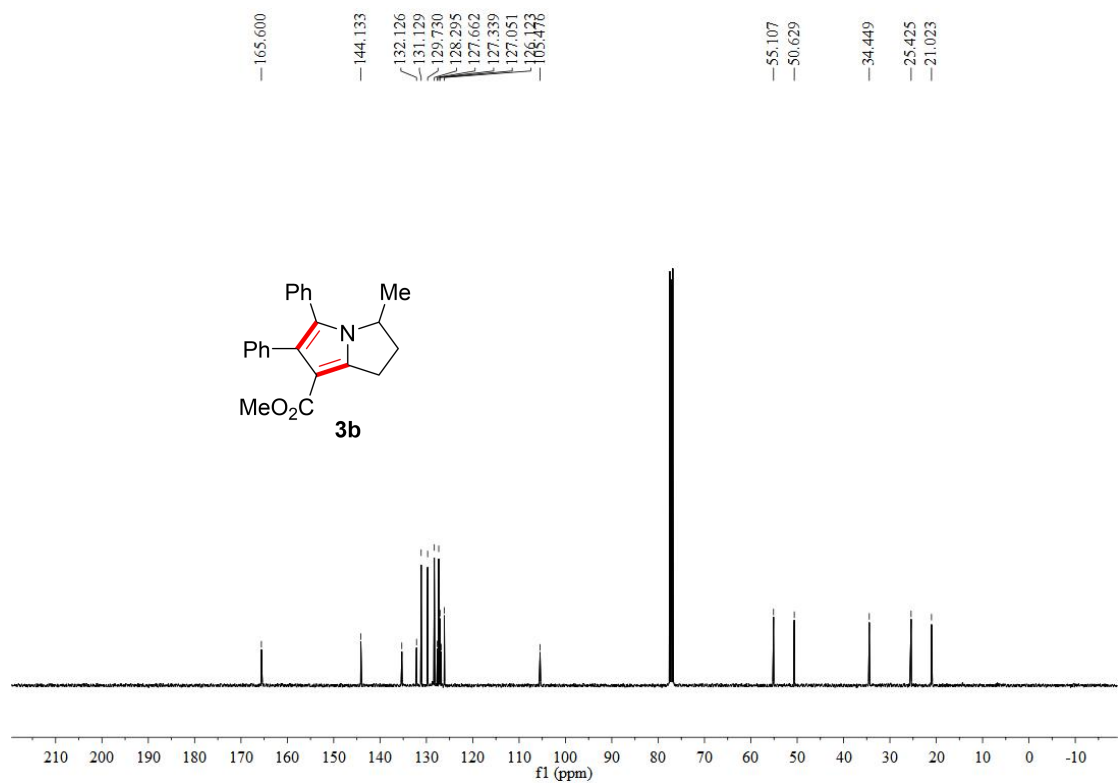

**3c,  $^1\text{H}+^{13}\text{C}$  NMR**

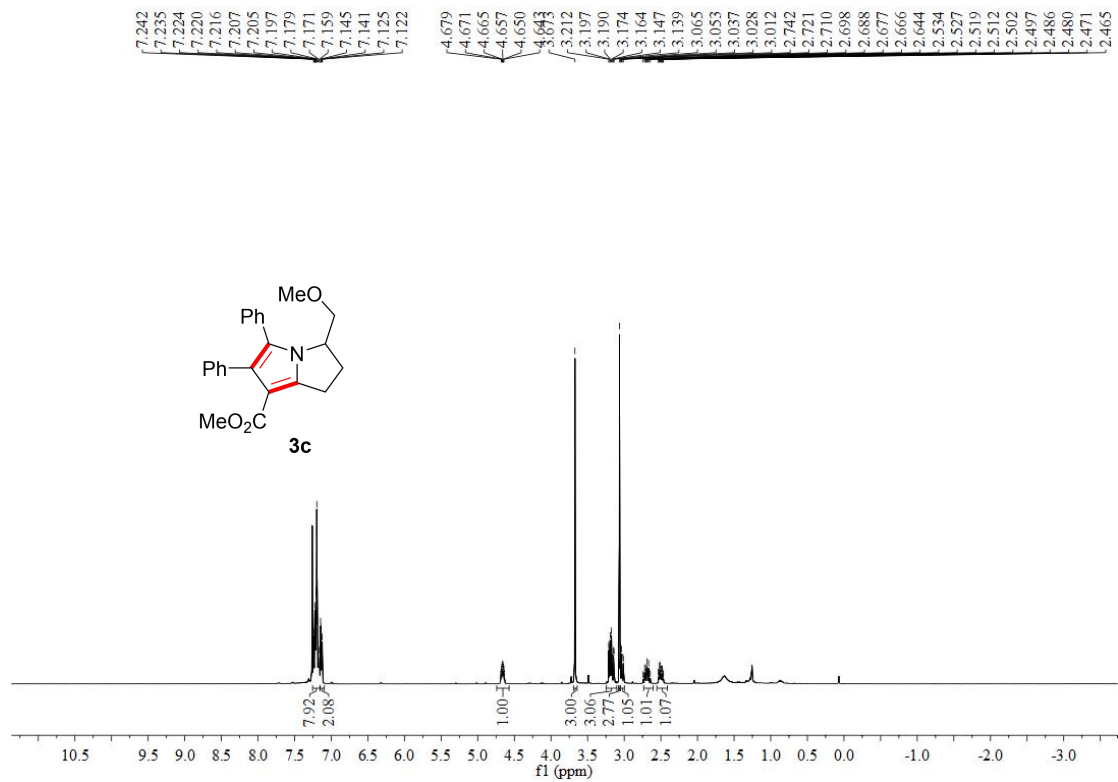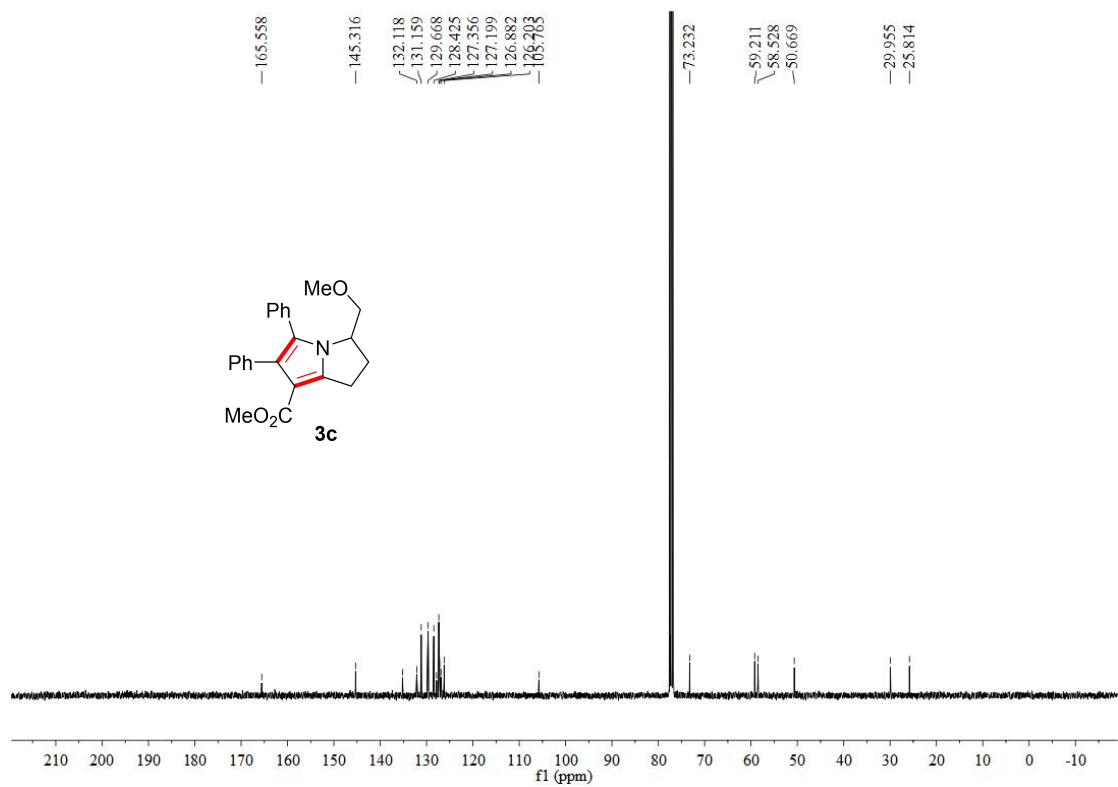

**3d,  $^1\text{H}+^{13}\text{C}$  NMR**

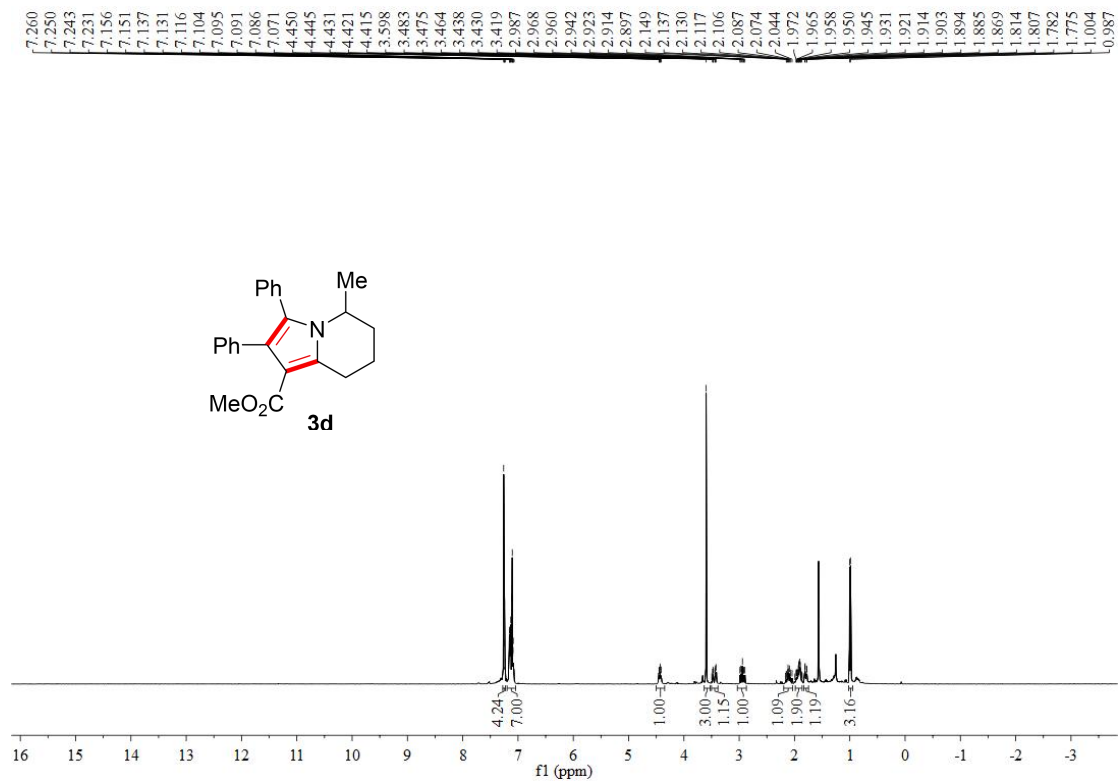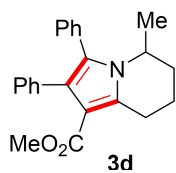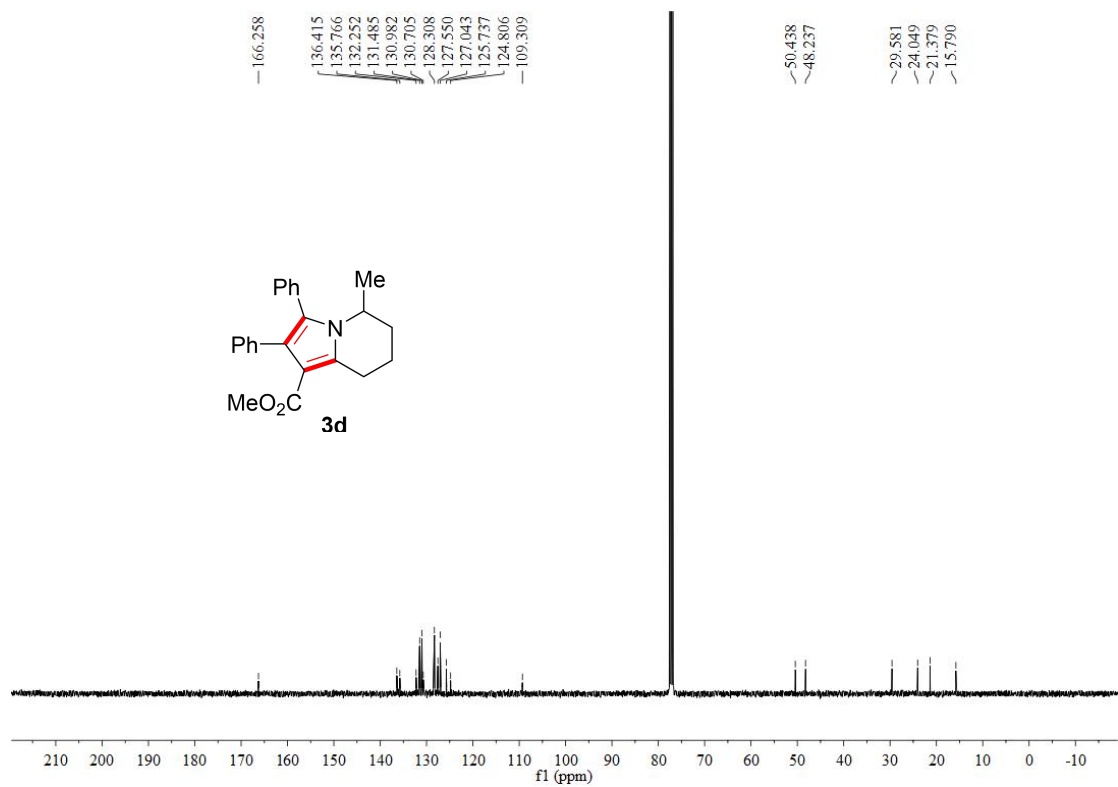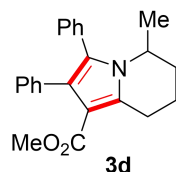

**3e,  $^1\text{H}+^{13}\text{C}$  NMR**

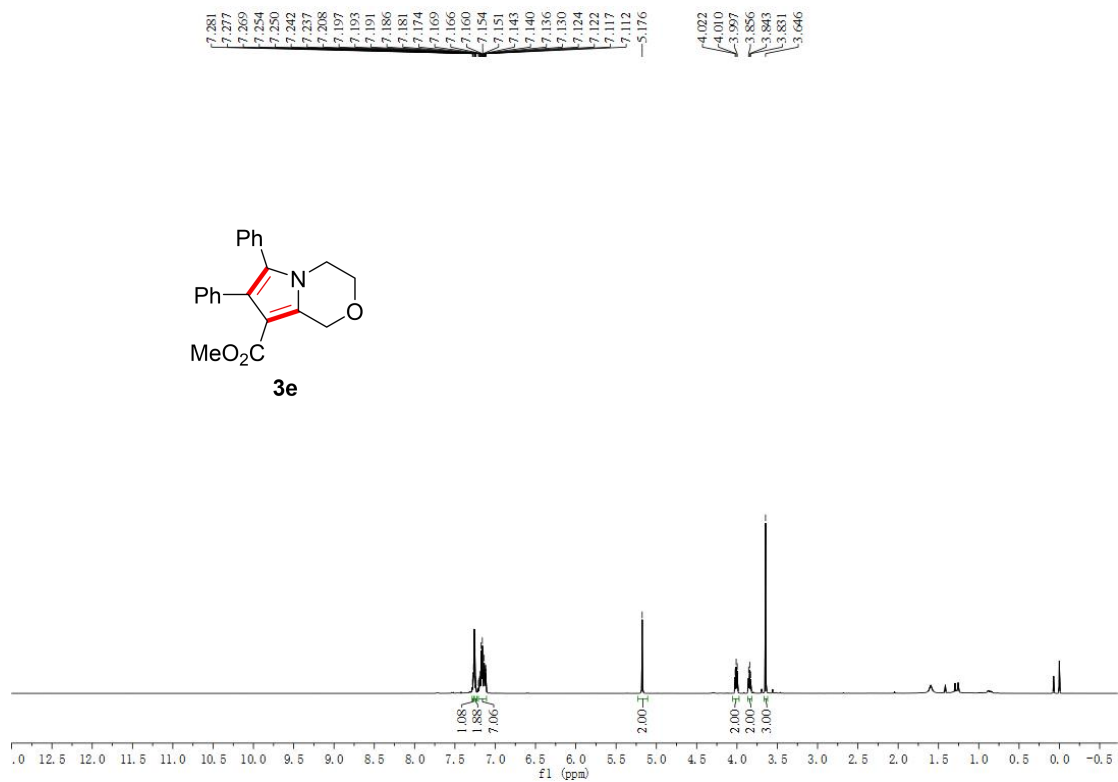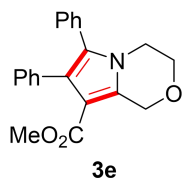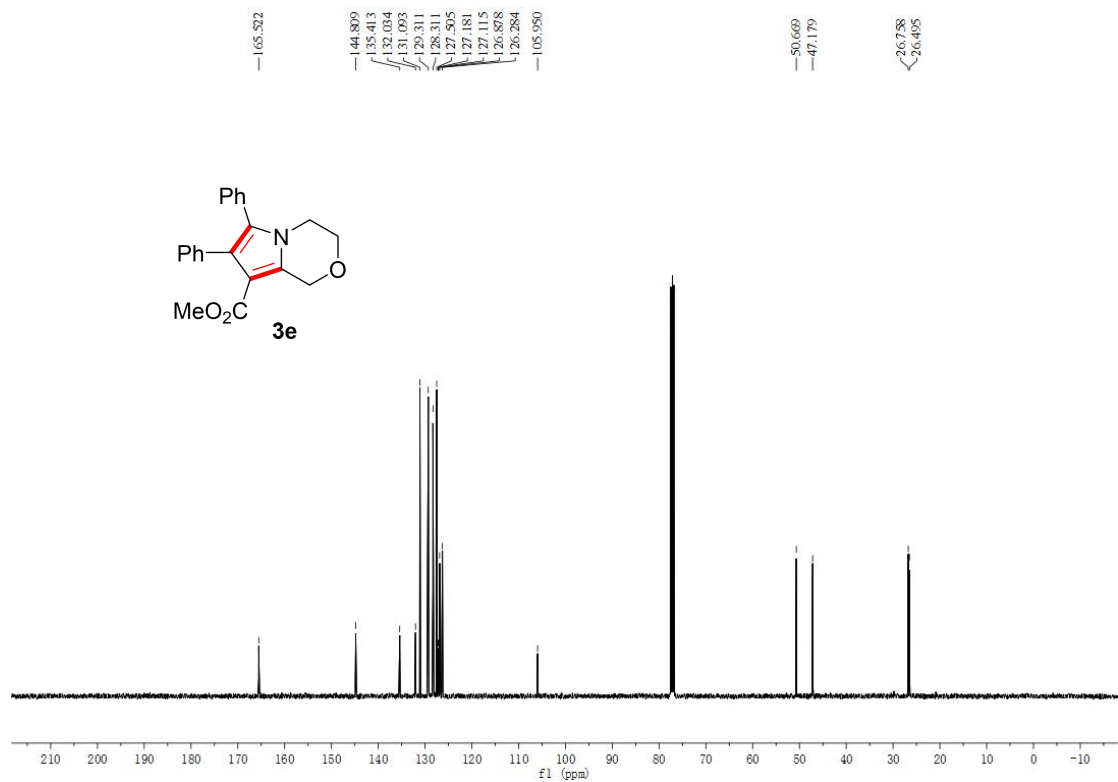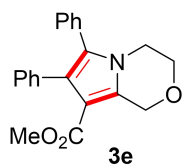

**3f, <sup>1</sup>H+<sup>13</sup>C NMR**

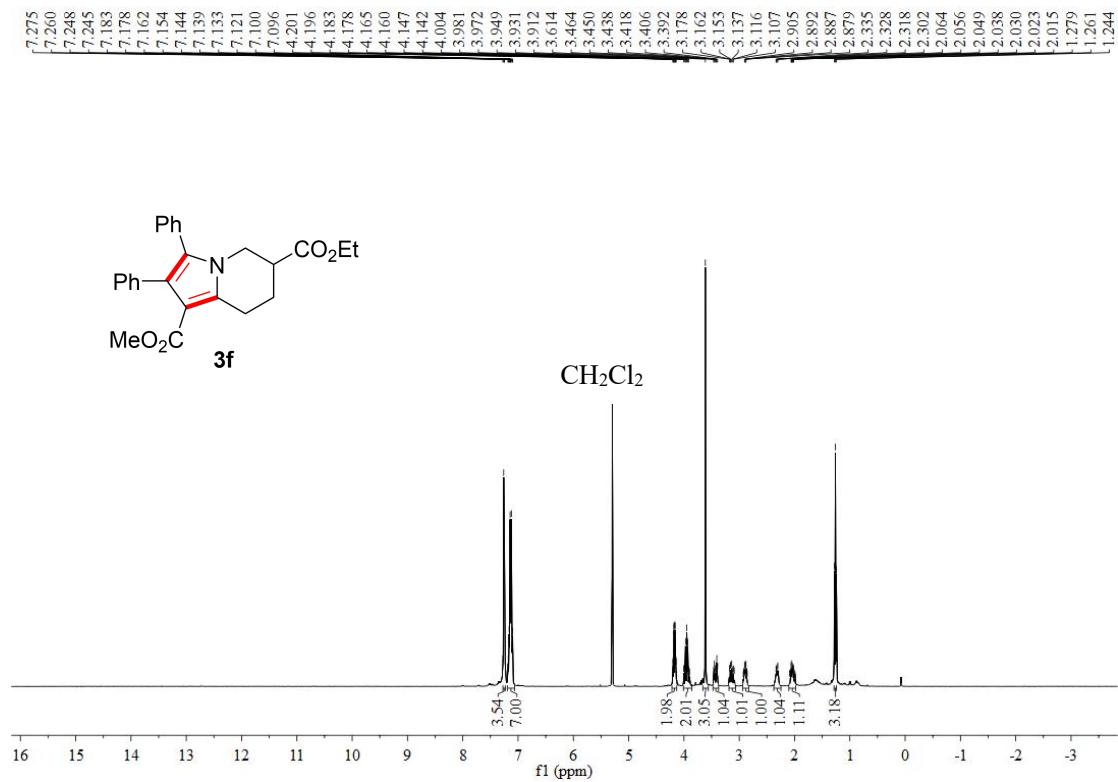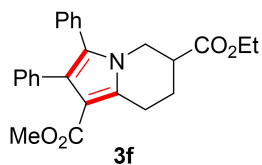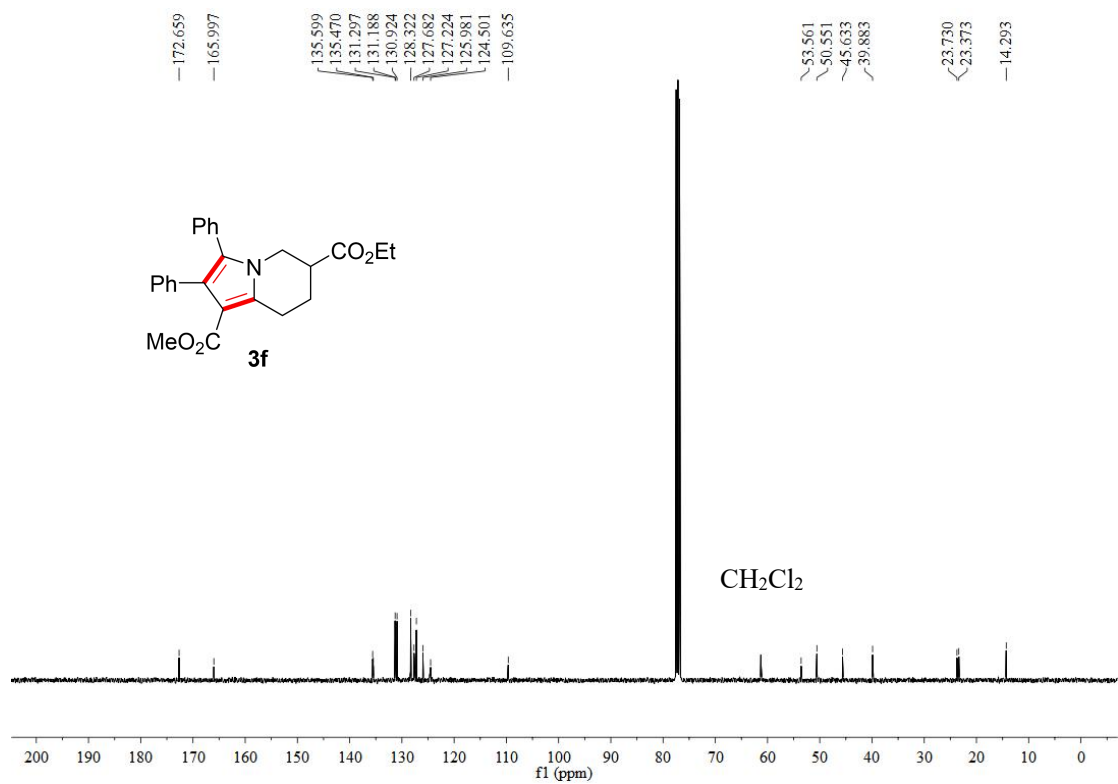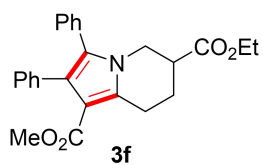



**3g, <sup>1</sup>H+<sup>13</sup>C NMR**

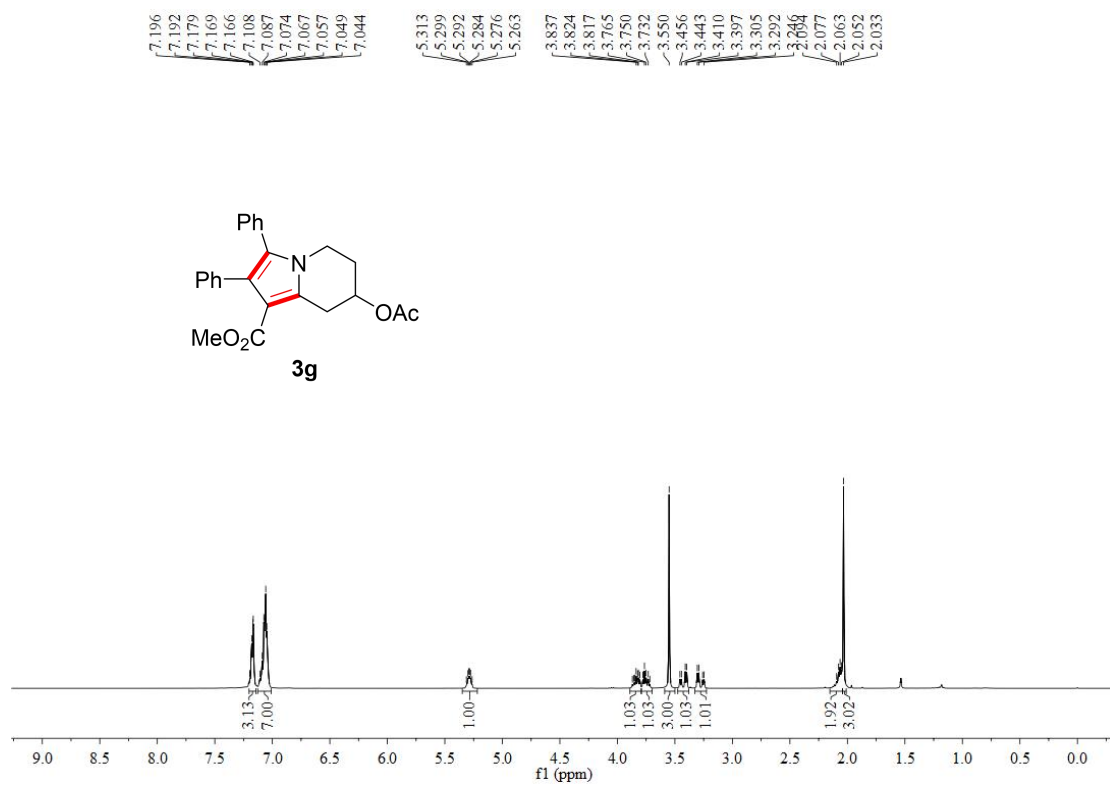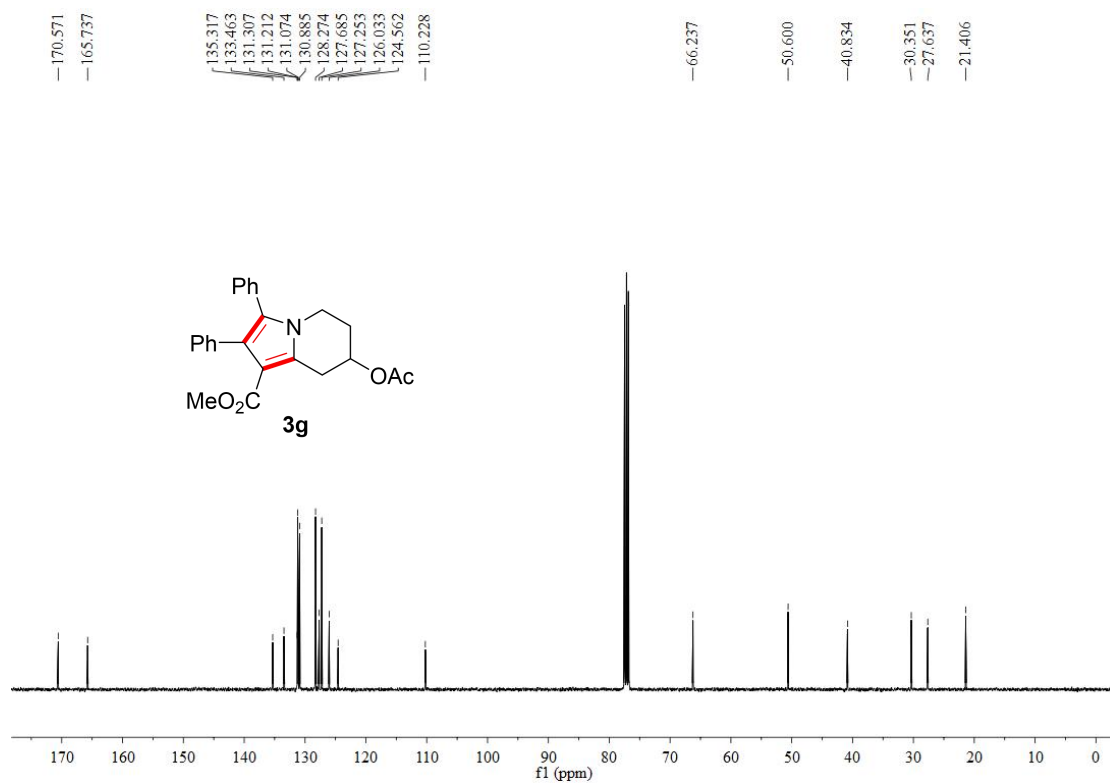

**3h,  $^1\text{H}+^{13}\text{C}$  NMR**

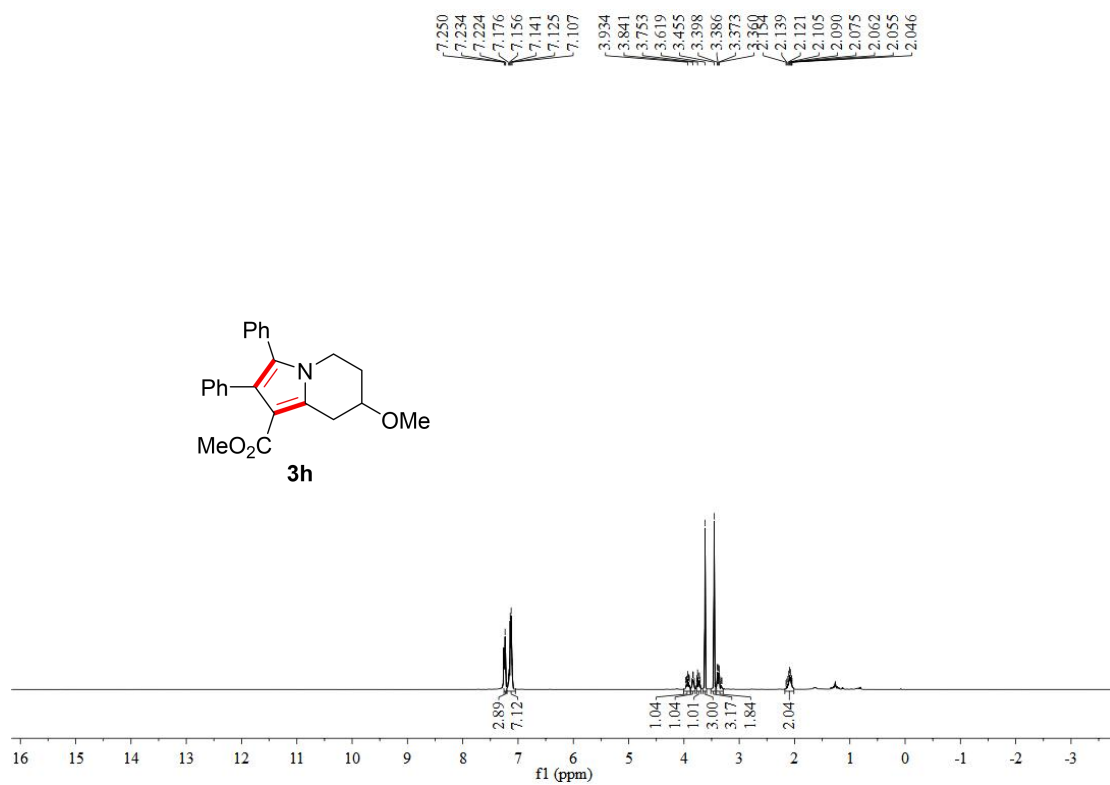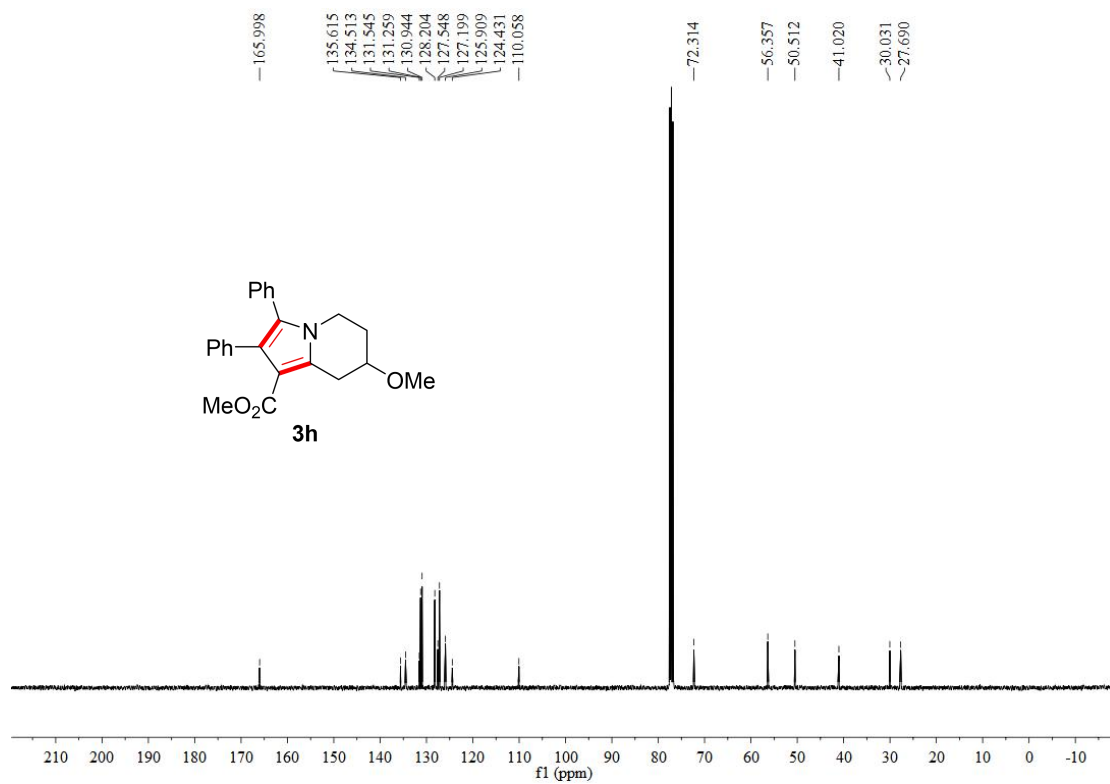

**3i, <sup>1</sup>H+<sup>13</sup>C NMR**

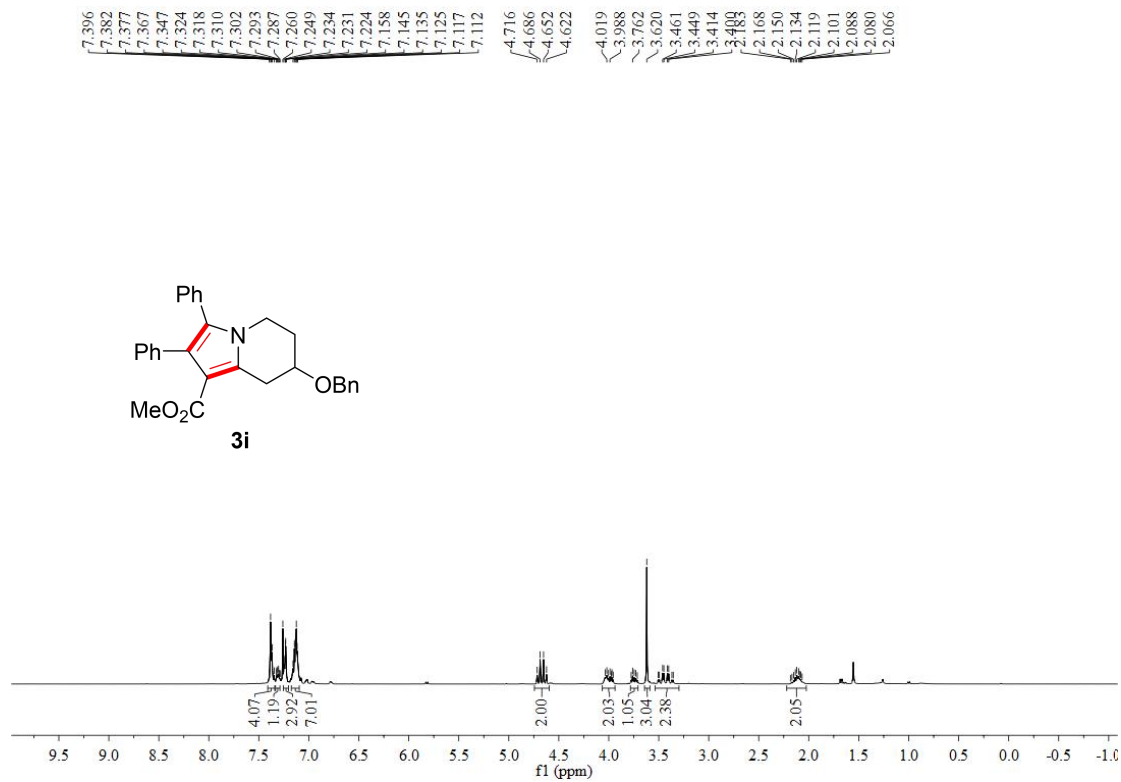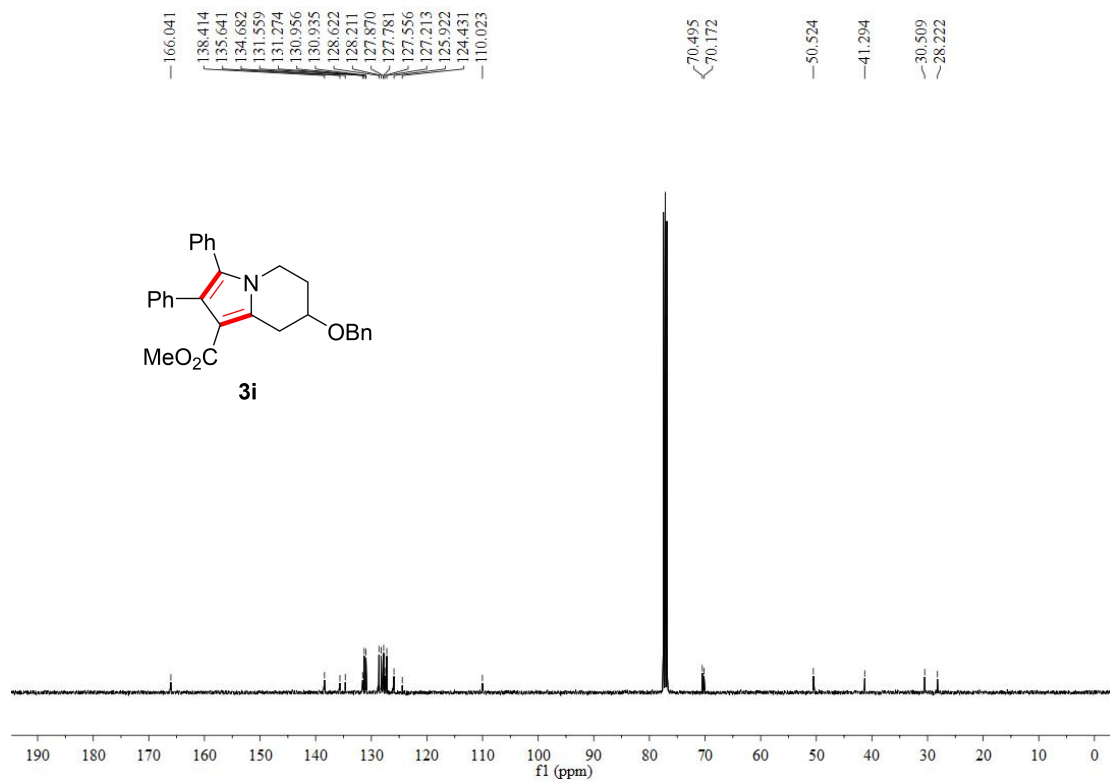

**3j, <sup>1</sup>H+<sup>13</sup>C NMR**

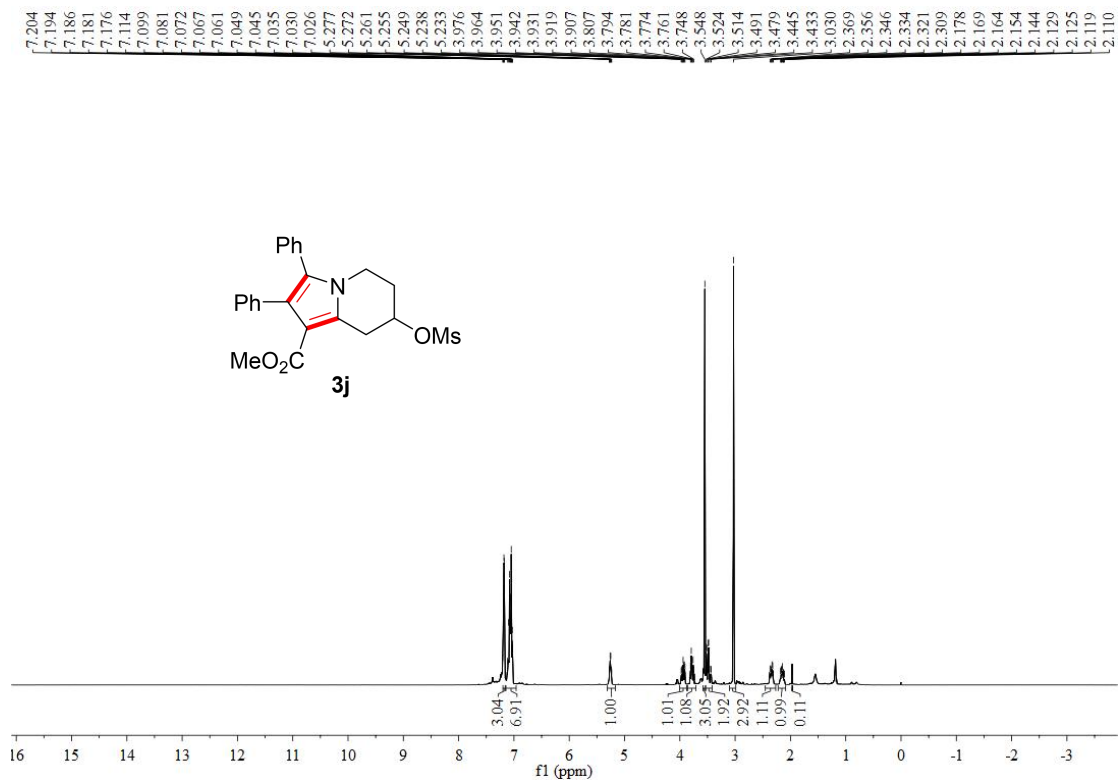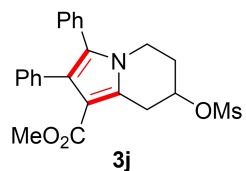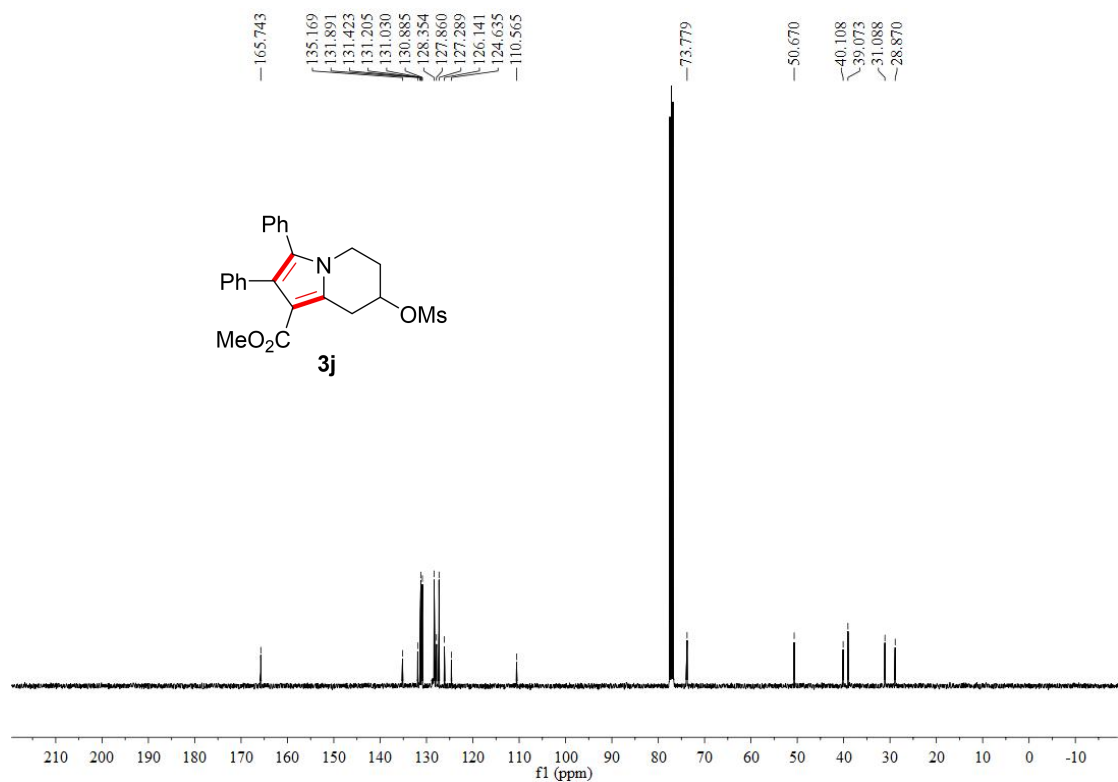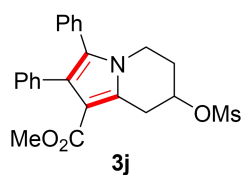

**3k, <sup>1</sup>H+<sup>13</sup>C NMR**

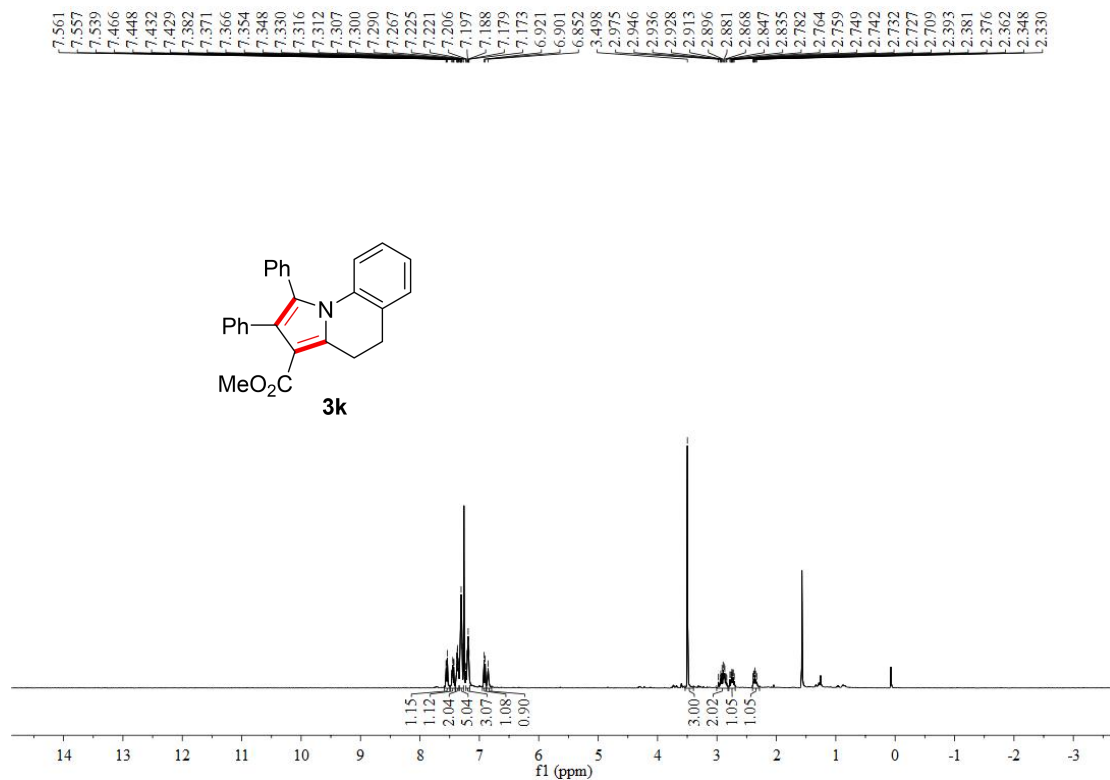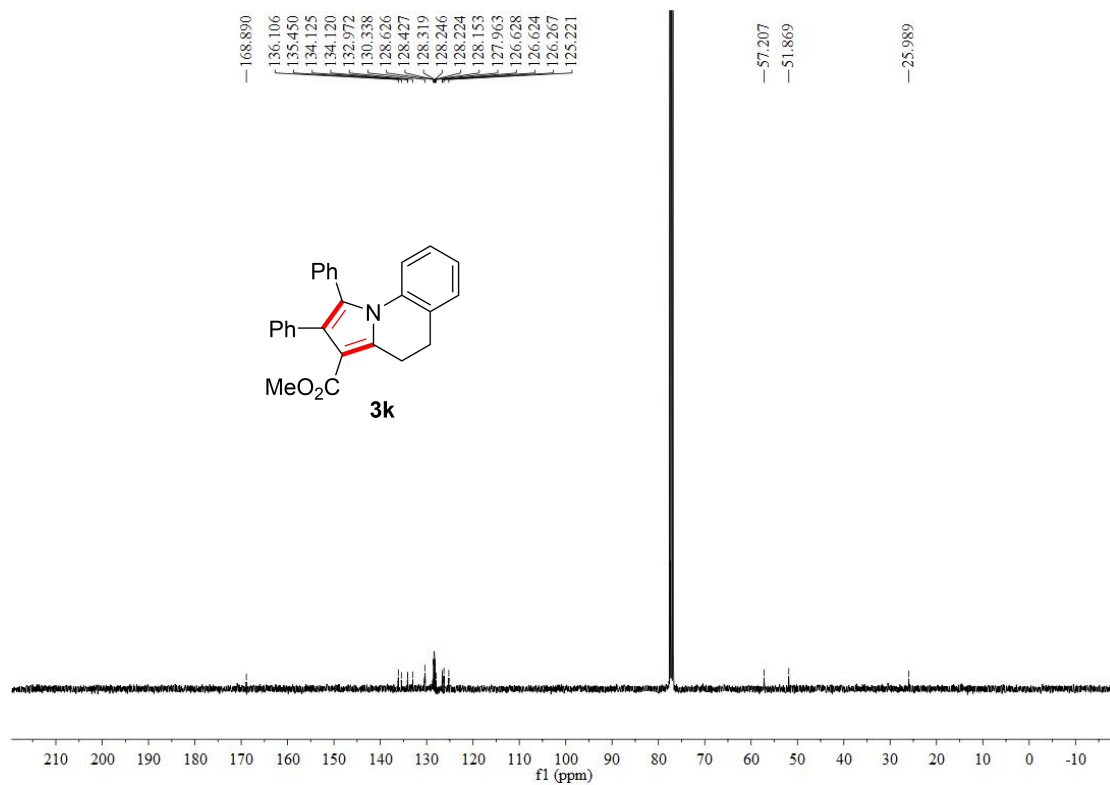

**4a, <sup>1</sup>H+<sup>13</sup>C NMR**

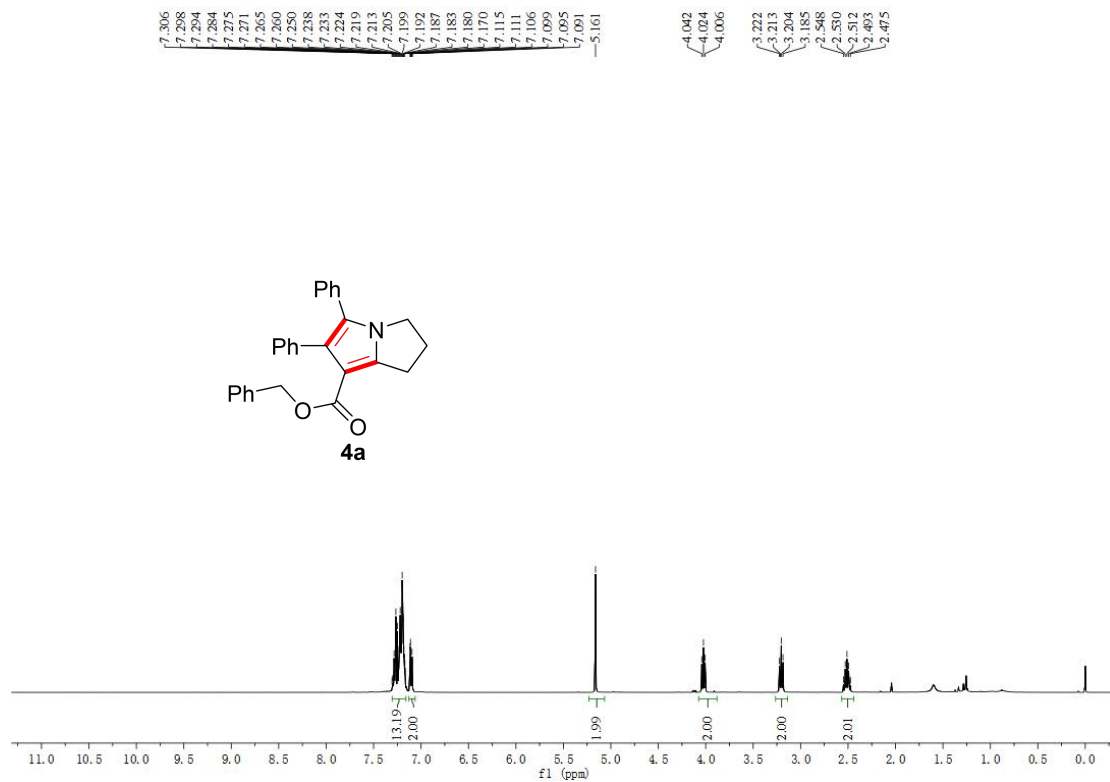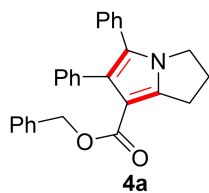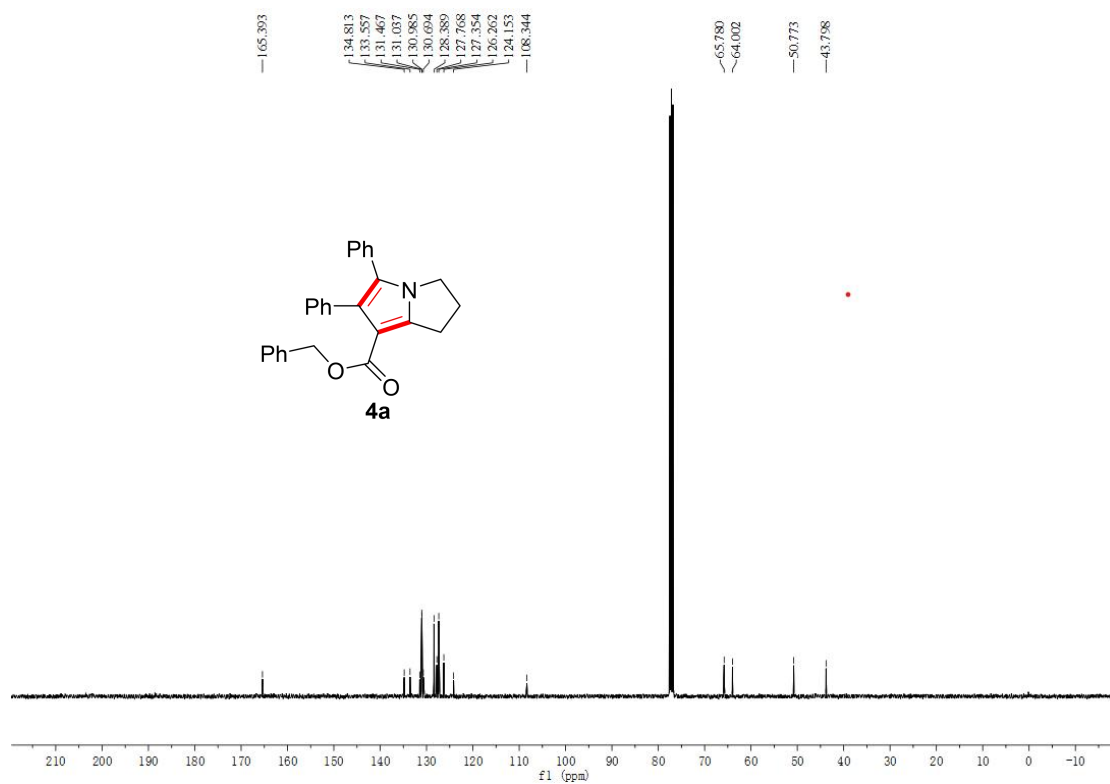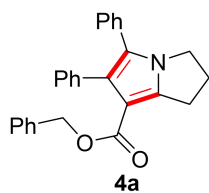

4b,  $^1\text{H}+^{13}\text{C}$  NMR

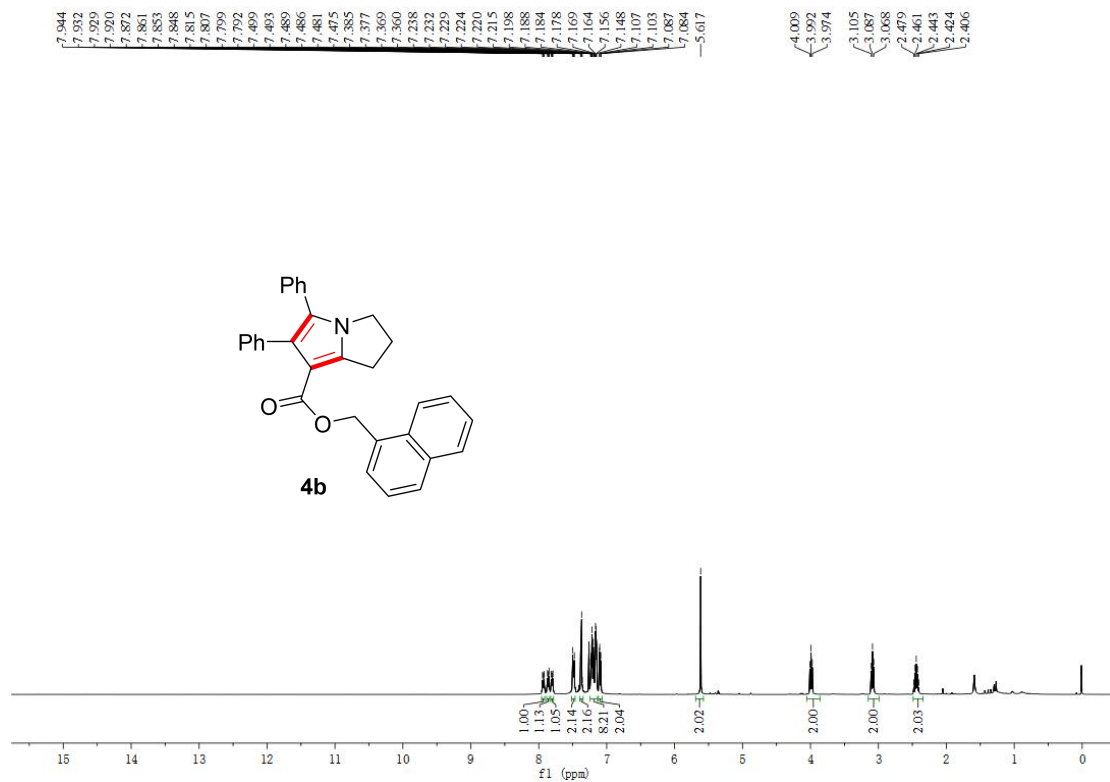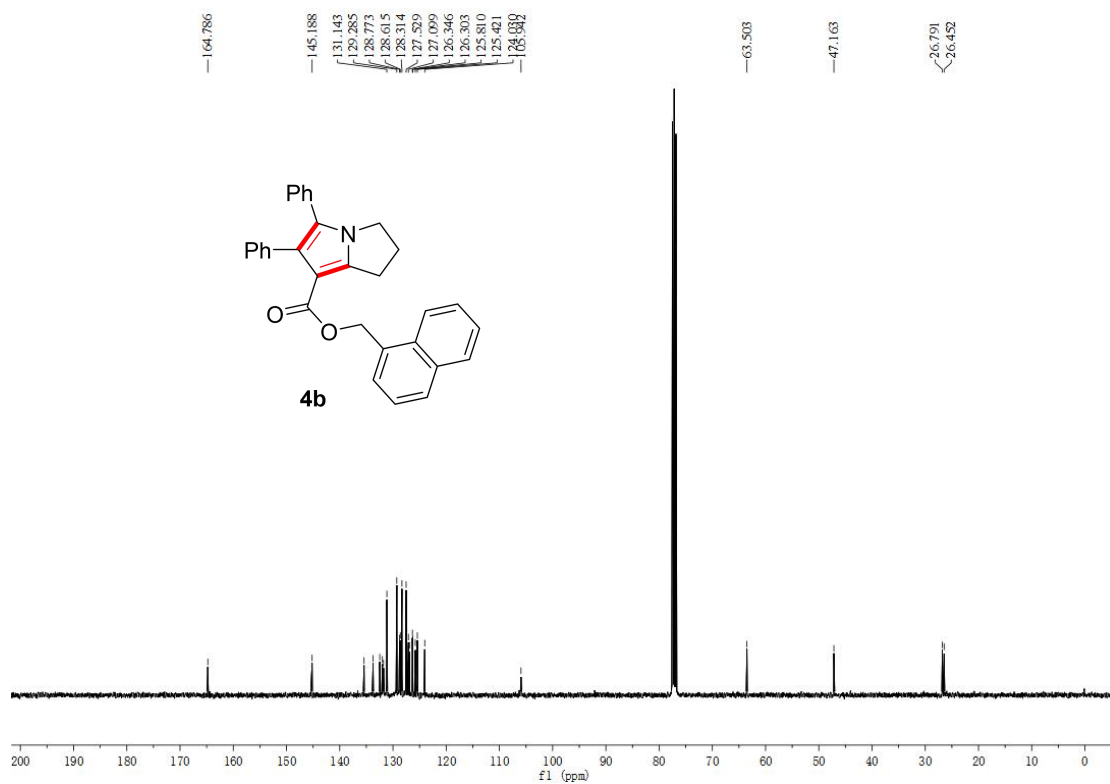

**4c,  $^1\text{H}+^{13}\text{C}$  NMR**

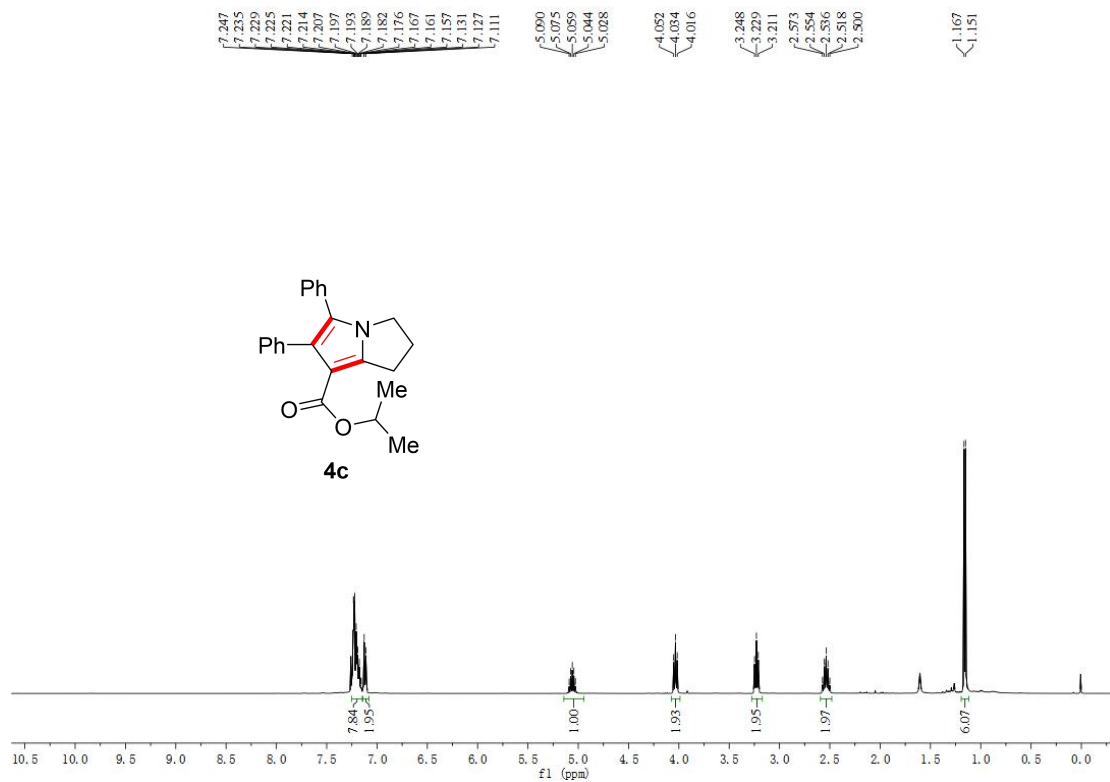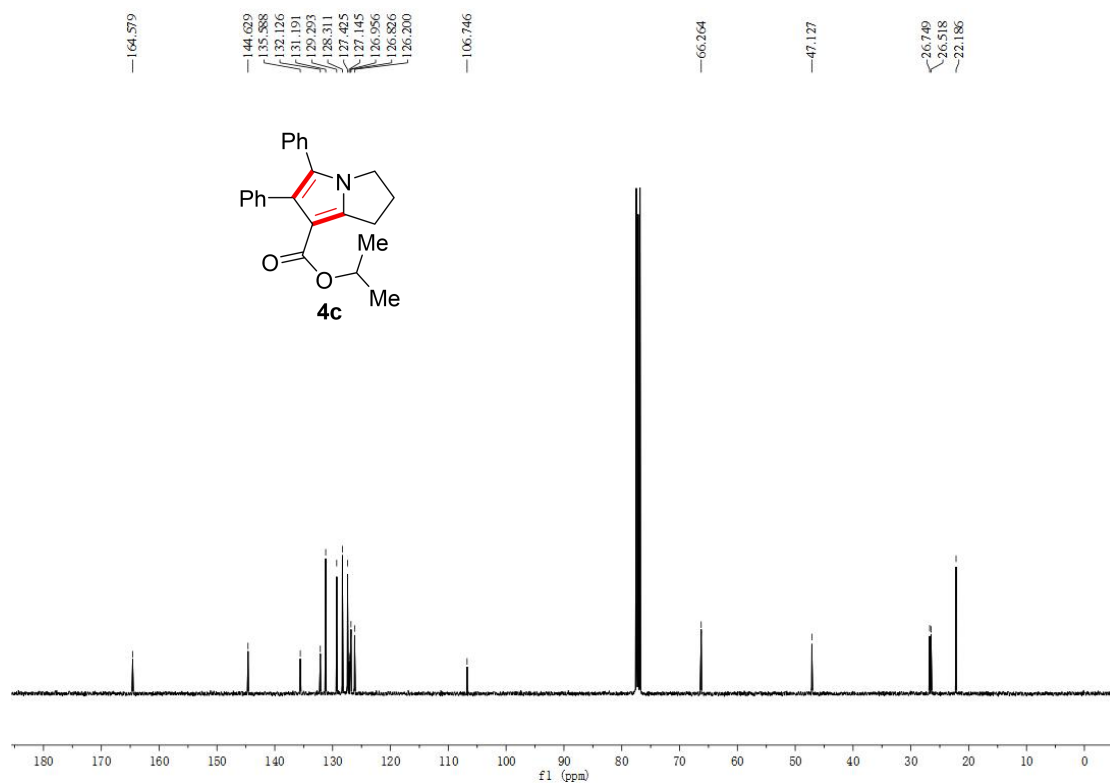



4d,  $^1\text{H}+^{13}\text{C}$  NMR

7.238  
7.227  
7.219  
7.216  
7.207  
7.198  
7.189  
7.185  
7.181  
7.175  
7.168  
7.159  
7.153  
7.149  
7.120  
7.116  
7.111  
7.103  
7.100  
7.096

4.104  
4.088  
4.072  
4.050  
4.033  
4.015

3.242  
3.223  
3.204

2.571  
2.552  
2.534  
2.516  
2.498

1.525  
1.507  
1.487  
1.274  
1.255  
0.884  
0.886  
0.888

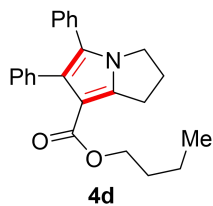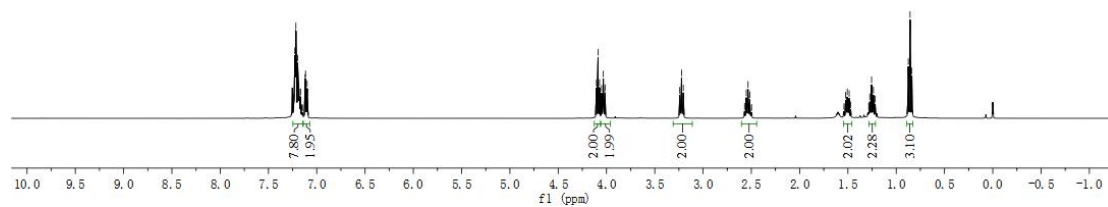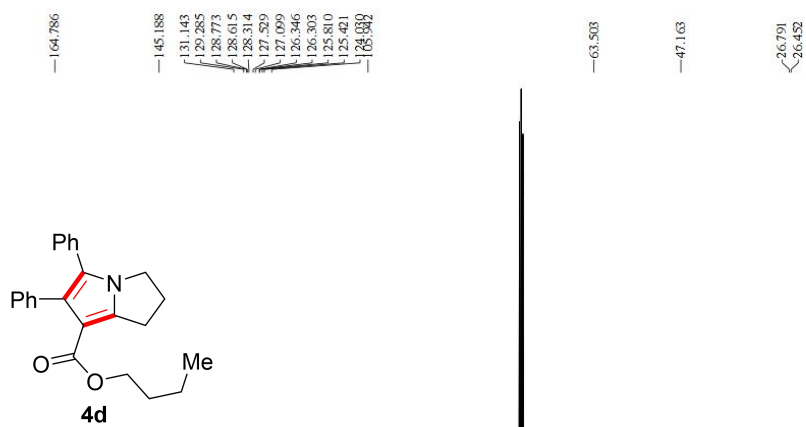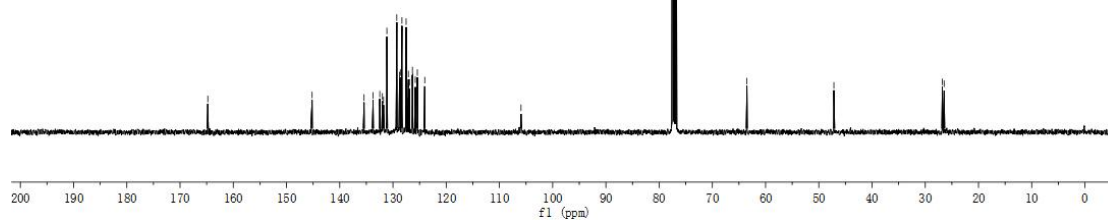

4e,  $^1\text{H}+^{13}\text{C}$  NMR

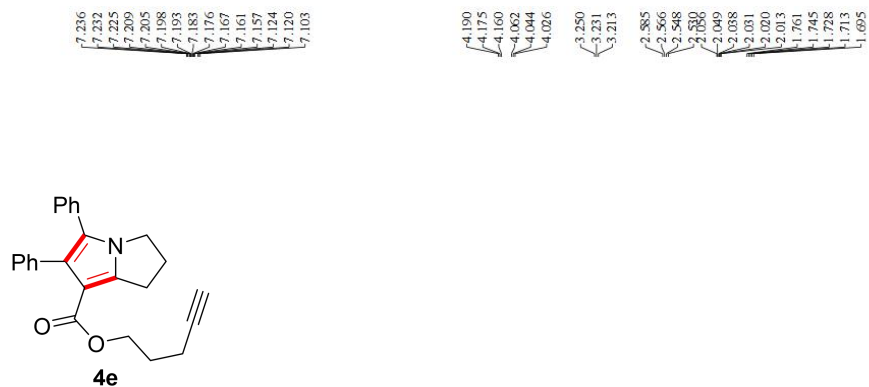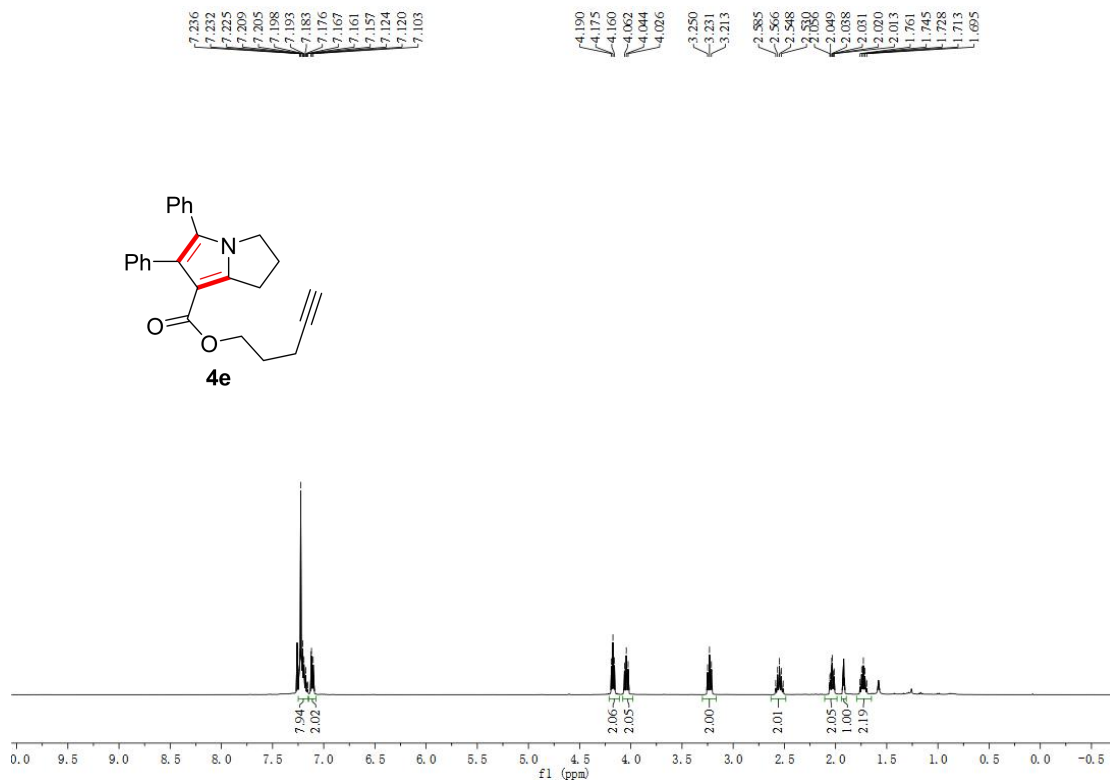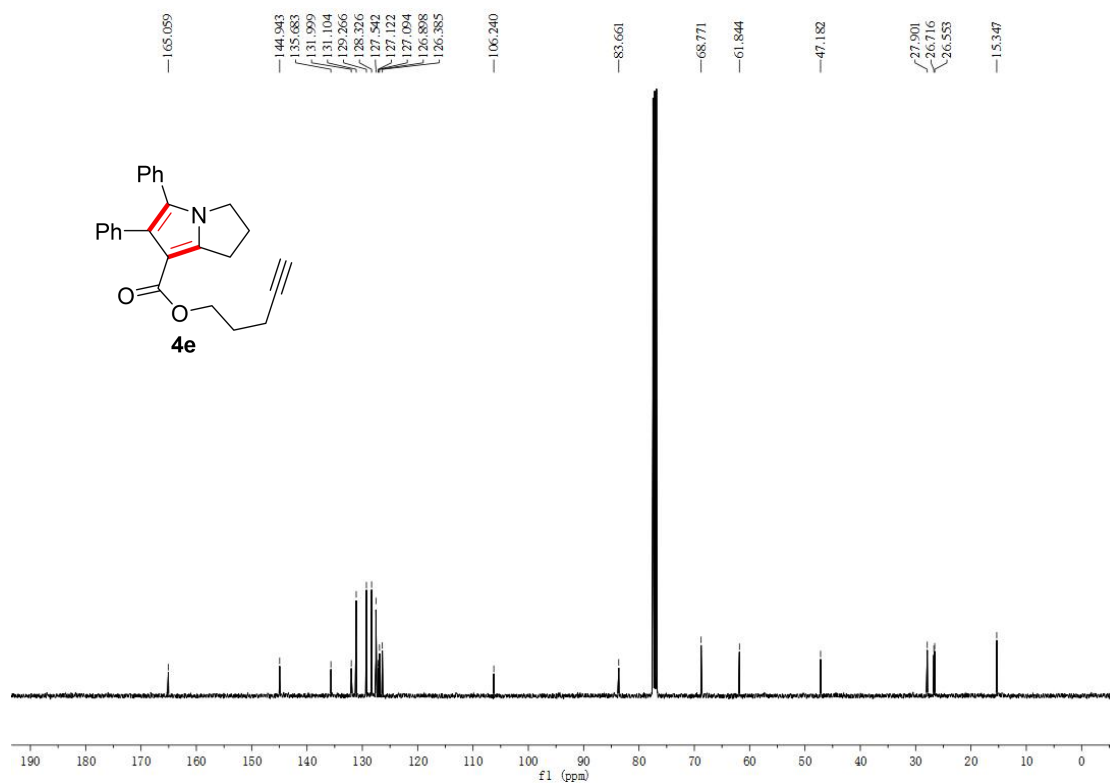

**4f,  $^1\text{H}+^{13}\text{C}$  NMR**

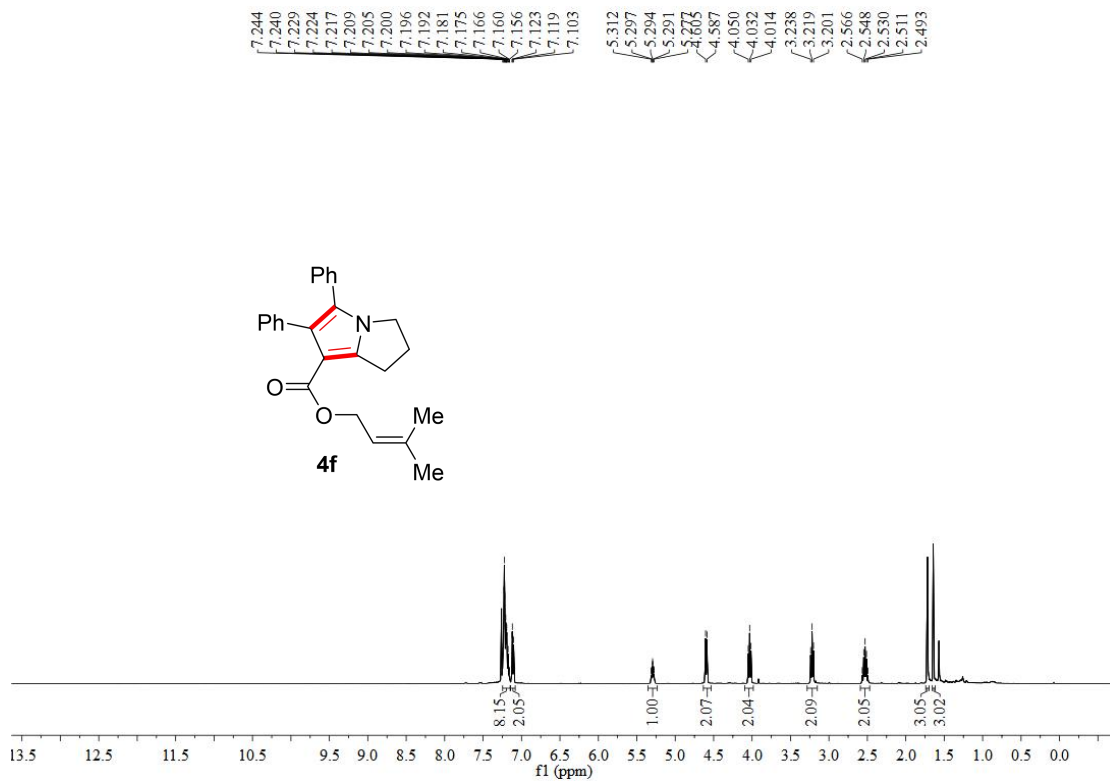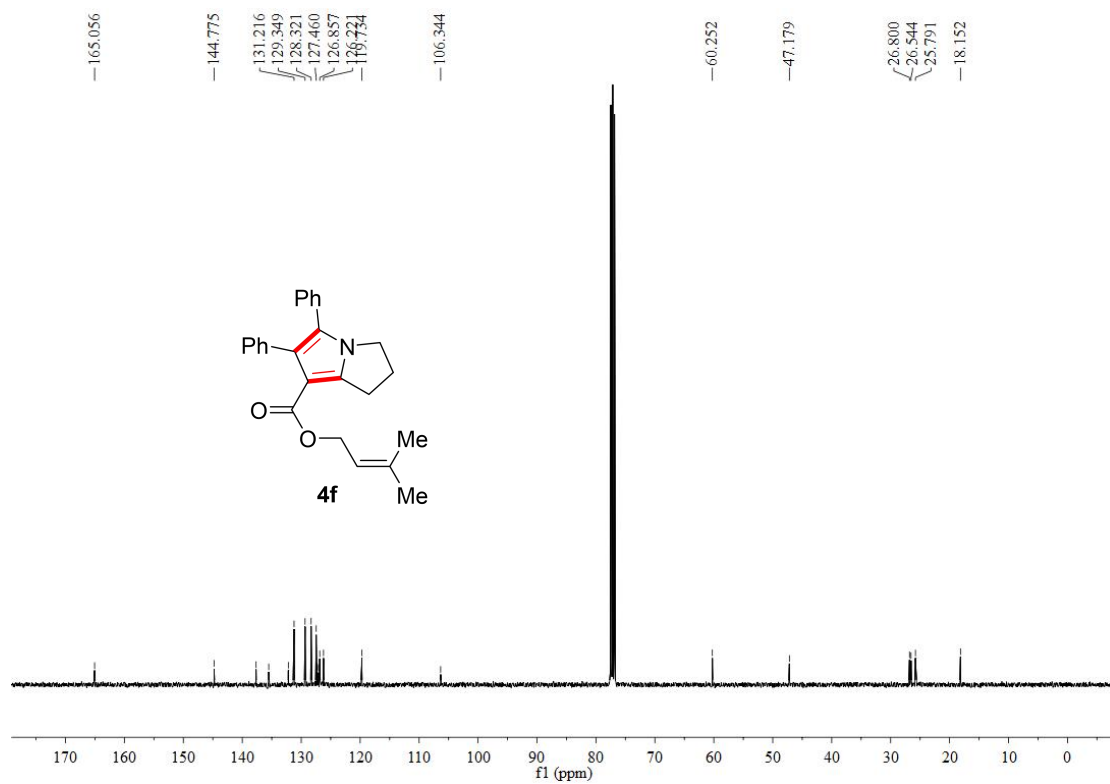

**4g, <sup>1</sup>H+<sup>13</sup>C NMR**

7.403  
7.397  
7.386  
7.239  
7.235  
7.221  
7.209  
7.205  
7.202  
7.198  
7.177  
7.163  
7.159  
7.146  
7.142  
7.139  
7.129  
7.125  
7.107  
7.104  
7.099  
6.977  
6.959  
6.941  
4.080  
4.062  
4.044  
3.357  
3.338  
3.318  
2.594  
2.576  
2.558  
2.540

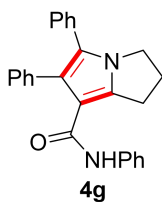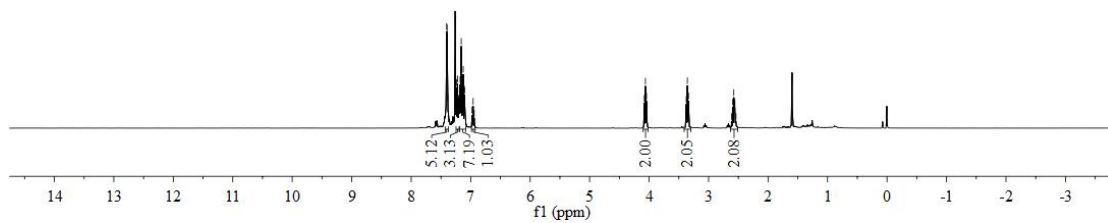

163.377  
144.680  
138.760  
131.672  
129.159  
129.017  
128.864  
128.392  
127.944  
126.940  
123.505  
123.207  
118.093  
118.176

46.961

26.801  
26.457

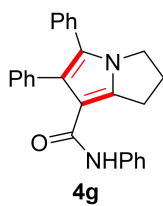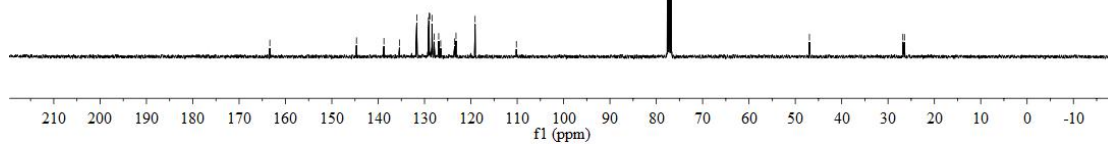

4h,  $^1\text{H}+^{13}\text{C}$  NMR

7.281 7.277 7.273 7.268 7.260 7.242 7.231 7.214 7.199 7.196 7.187 7.184 6.931 6.922 6.919 6.909 6.907 6.904 6.899 6.895 5.119 5.104 5.088 5.072 5.057 4.020 4.002 3.984 3.208 3.184 3.159 2.535 2.517 2.499 2.481 1.206 1.190

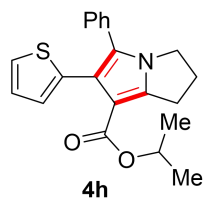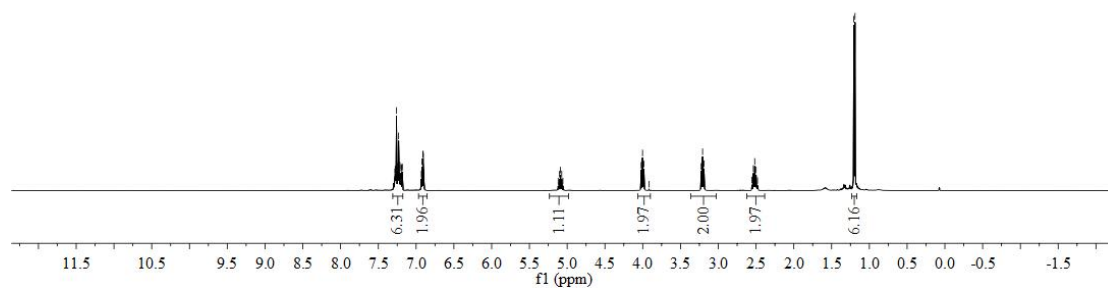

164.283 144.568 136.695 131.829 129.297 128.600 128.356 128.167 127.286 126.333 125.918 66.407 47.194 26.732 26.472 22.206

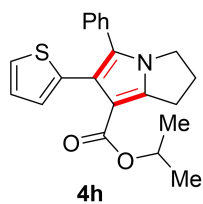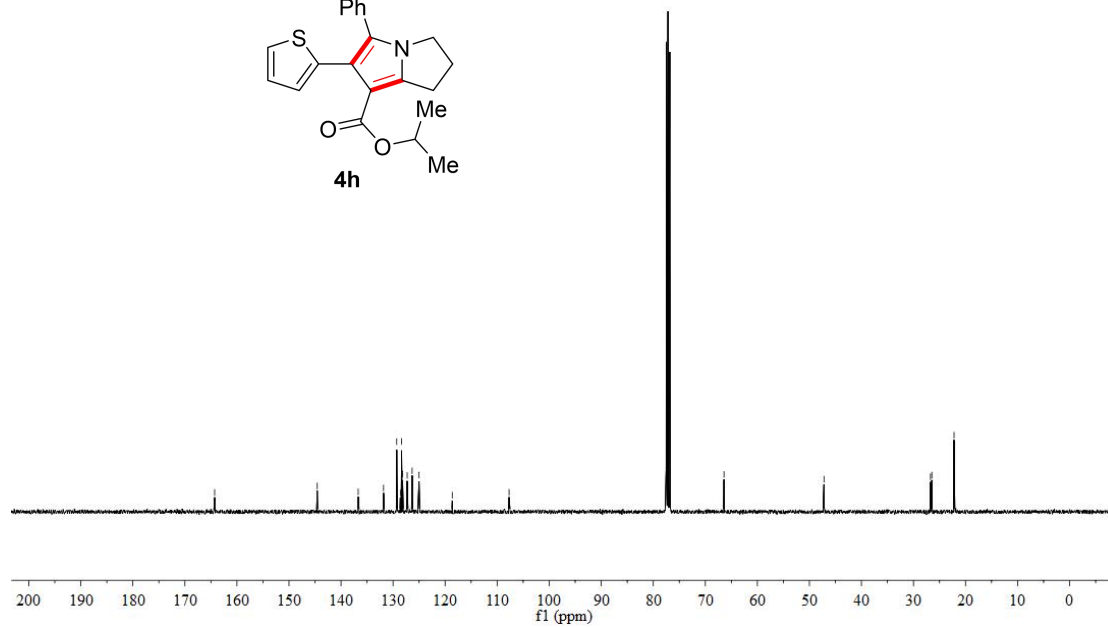

**4i,  $^1\text{H}+^{13}\text{C}$  NMR**

7.212  
7.192  
7.188  
7.180  
7.174  
7.165  
7.160  
7.148  
7.143  
7.132  
7.128  
7.111  
6.794  
6.787  
6.765  
6.758  
5.101  
5.085  
5.070  
5.054  
5.039  
4.043  
4.025  
4.007  
3.779  
3.331  
3.313  
3.194  
2.560  
2.541  
2.523  
2.305  
2.487

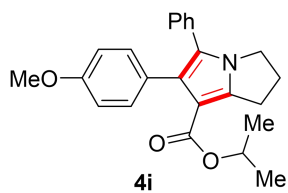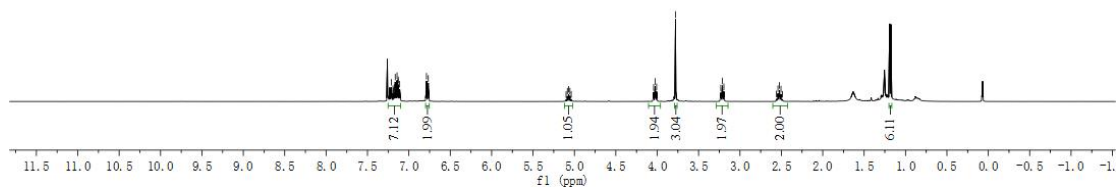

164.605  
138.146  
144.526  
132.285  
132.208  
129.316  
128.335  
127.899  
126.919  
126.825  
126.755  
113.004  
106.713  
66.218  
55.257  
47.170  
29.840  
26.857  
26.478  
22.278

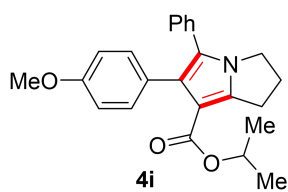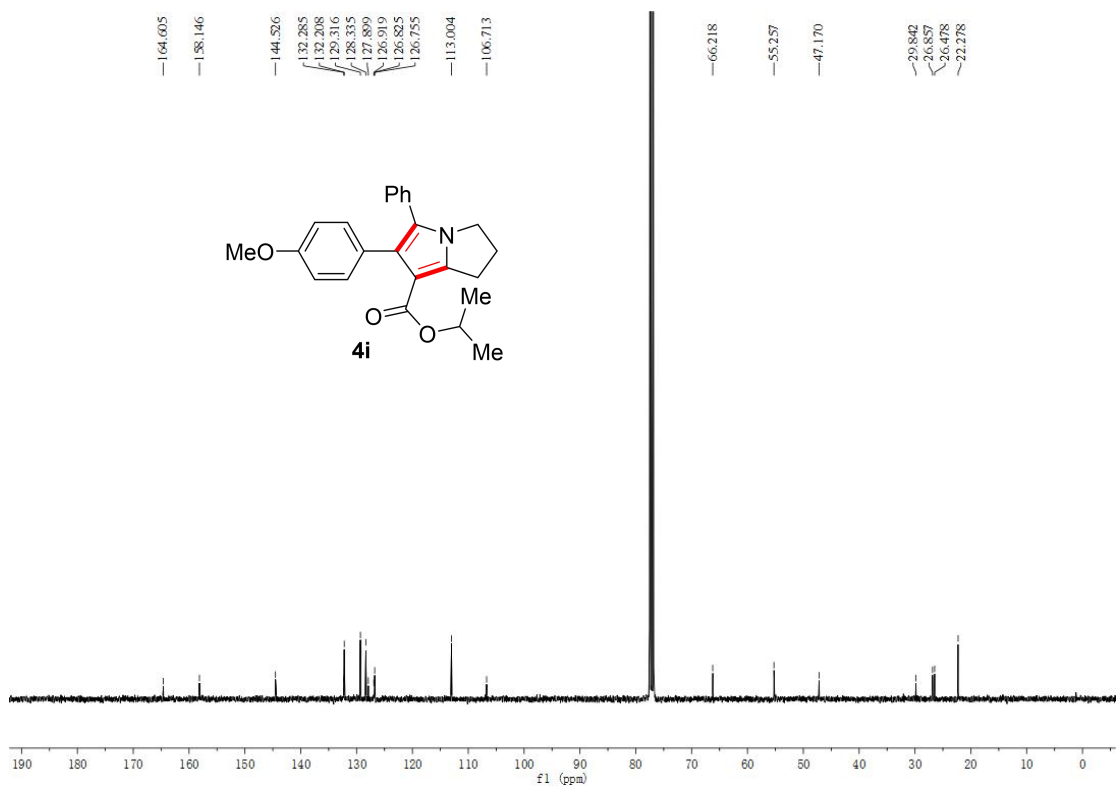

4j,  $^1\text{H}+^{13}\text{C}$  NMR

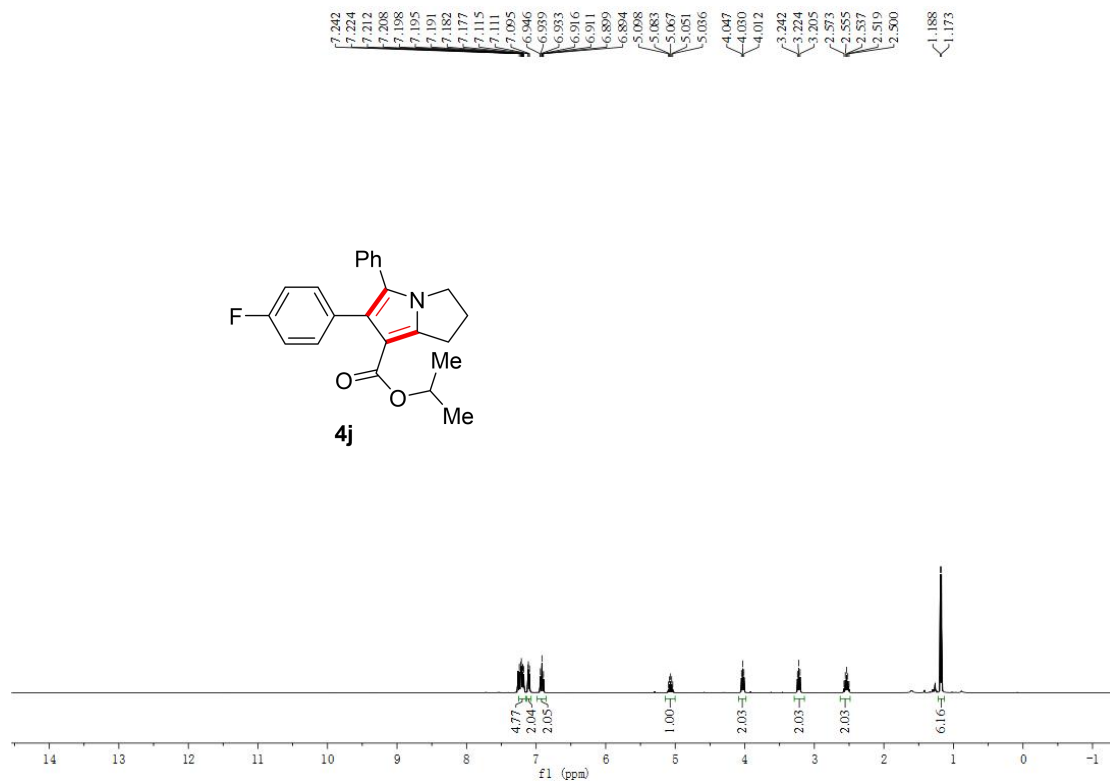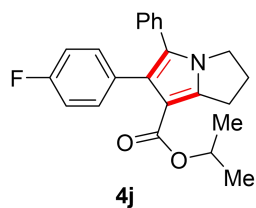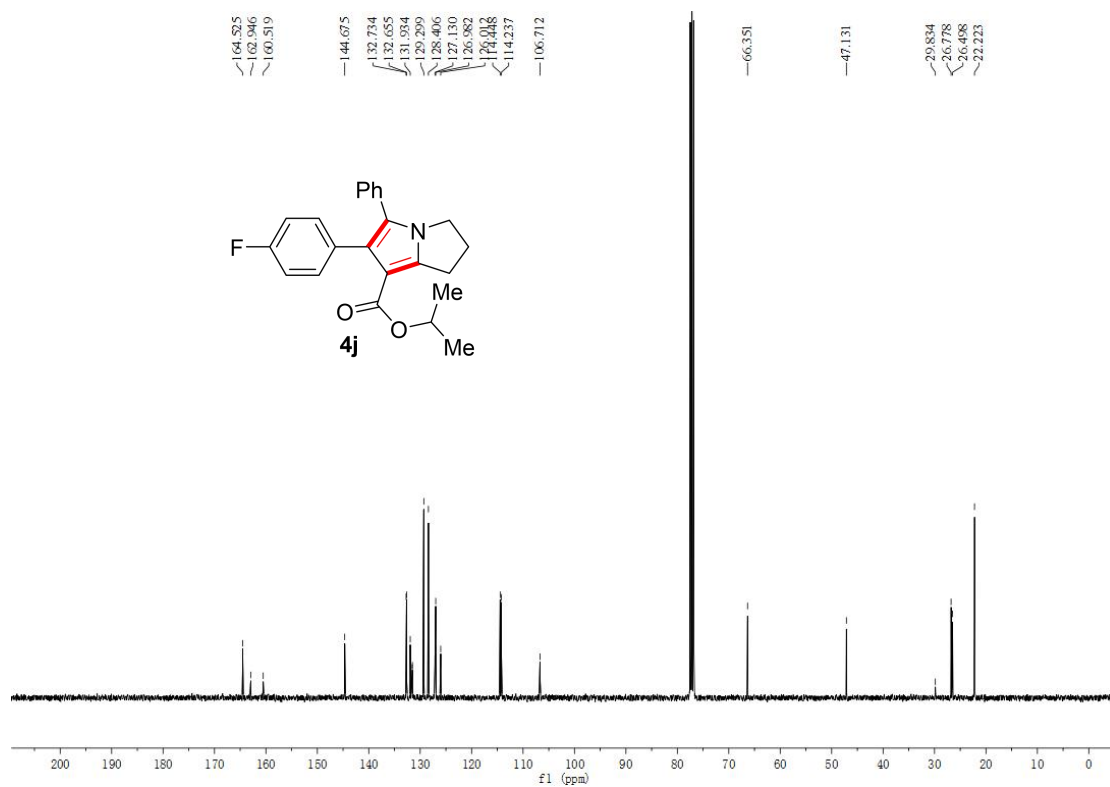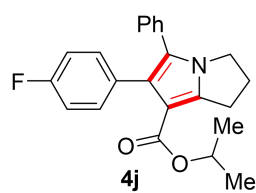

4j, <sup>19</sup>F NMR

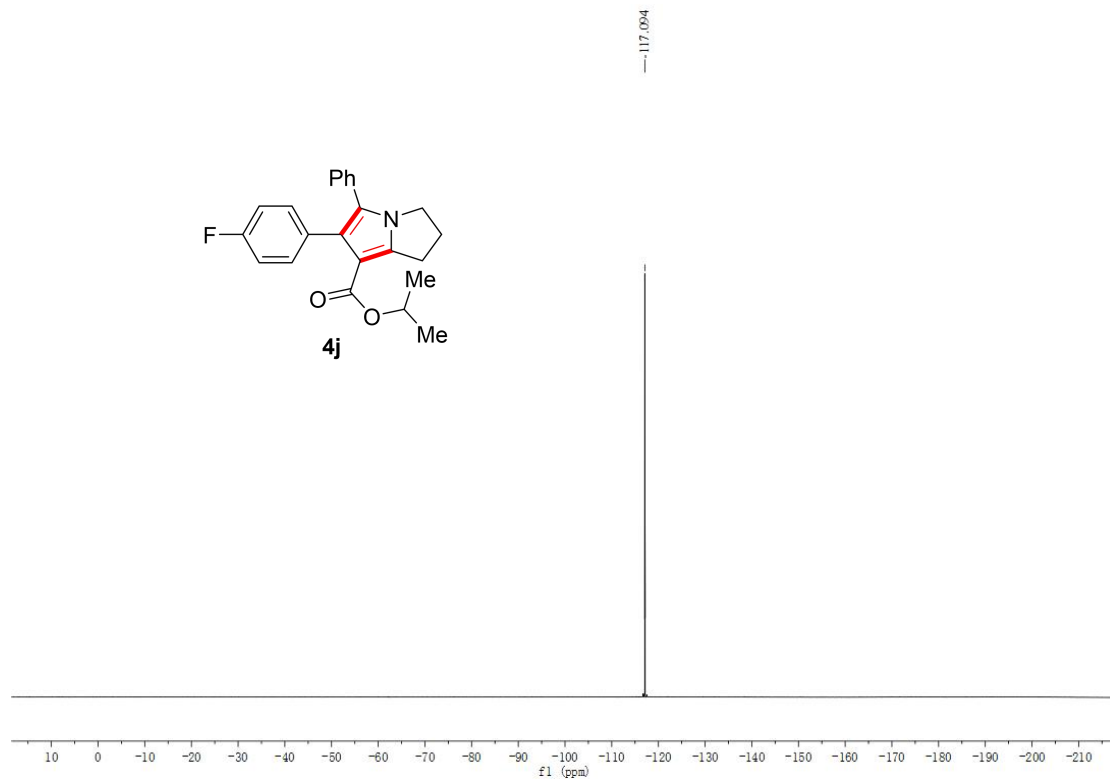



4k,  $^1\text{H}+^{13}\text{C}$  NMR

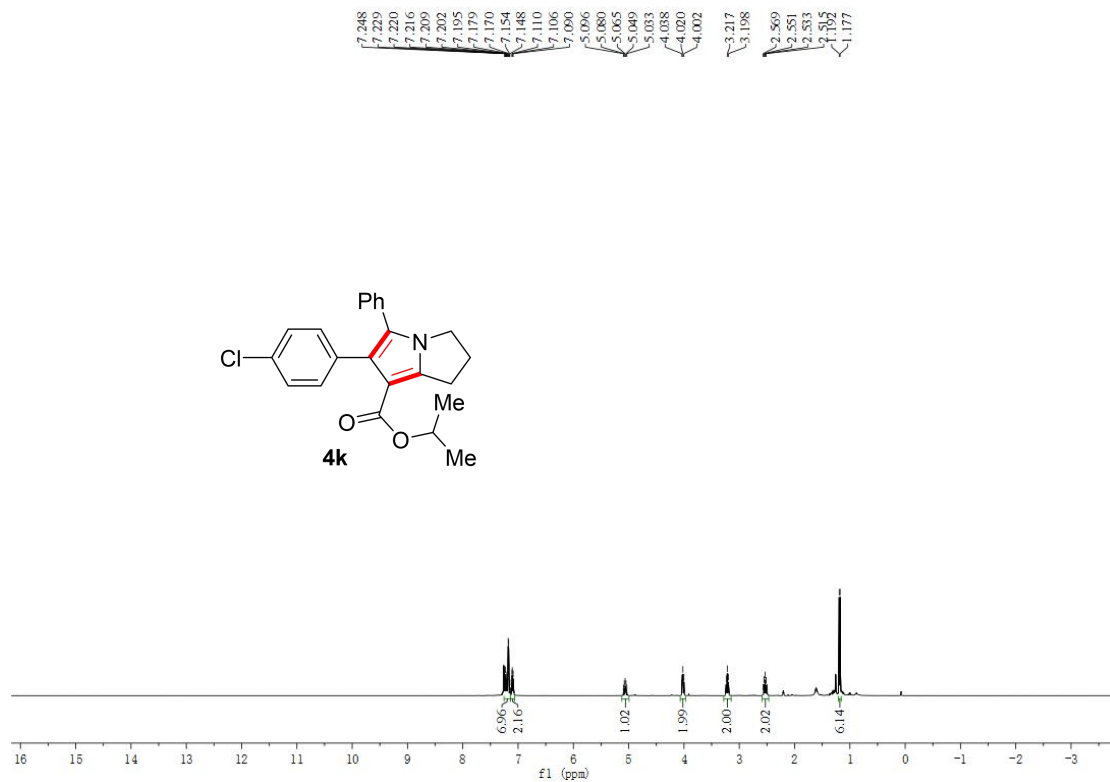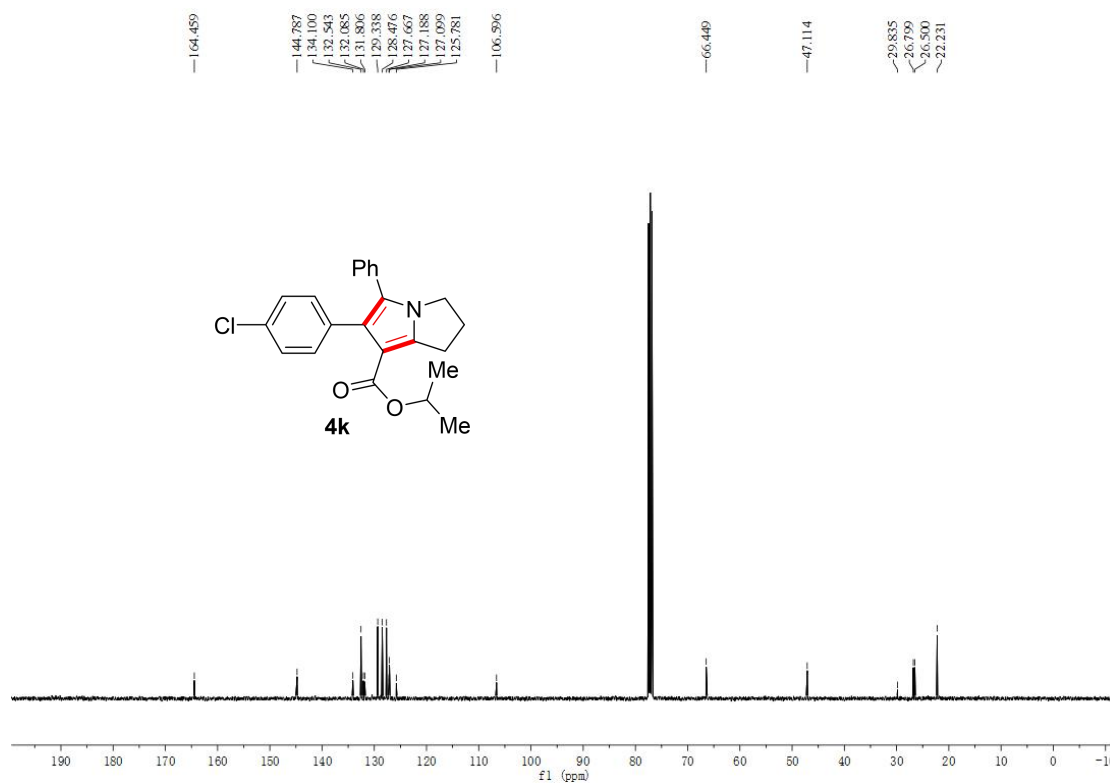

4I,  $^1\text{H}+^{13}\text{C}$  NMR

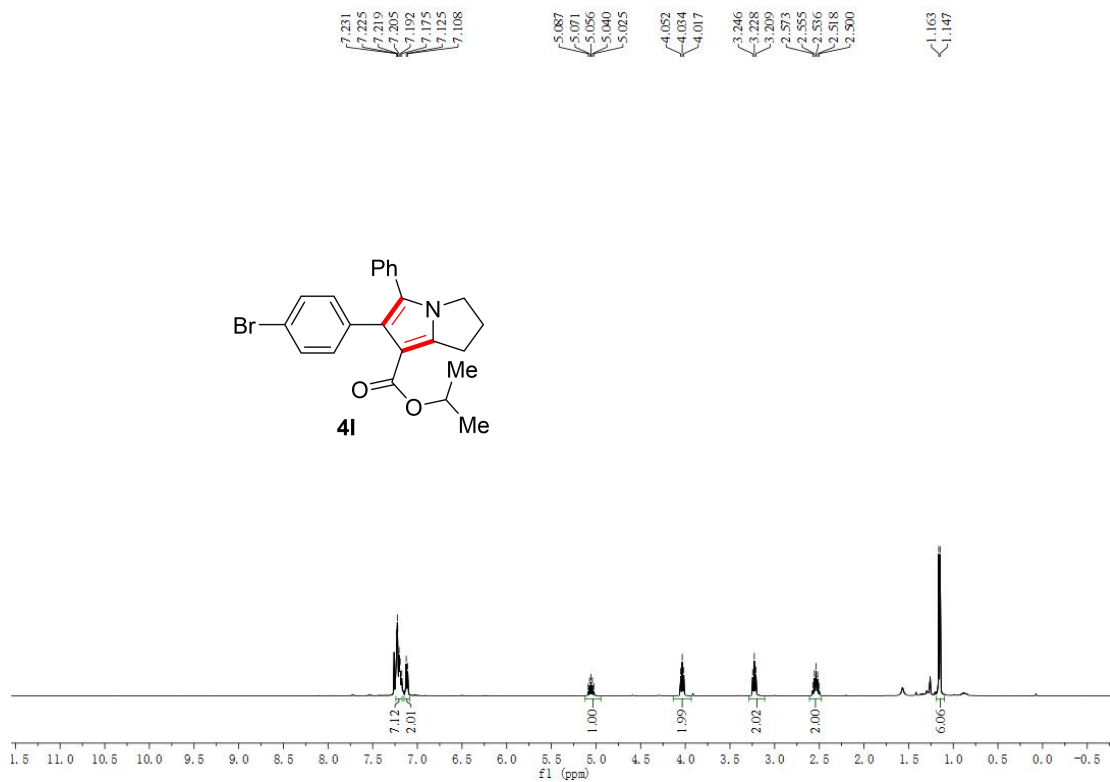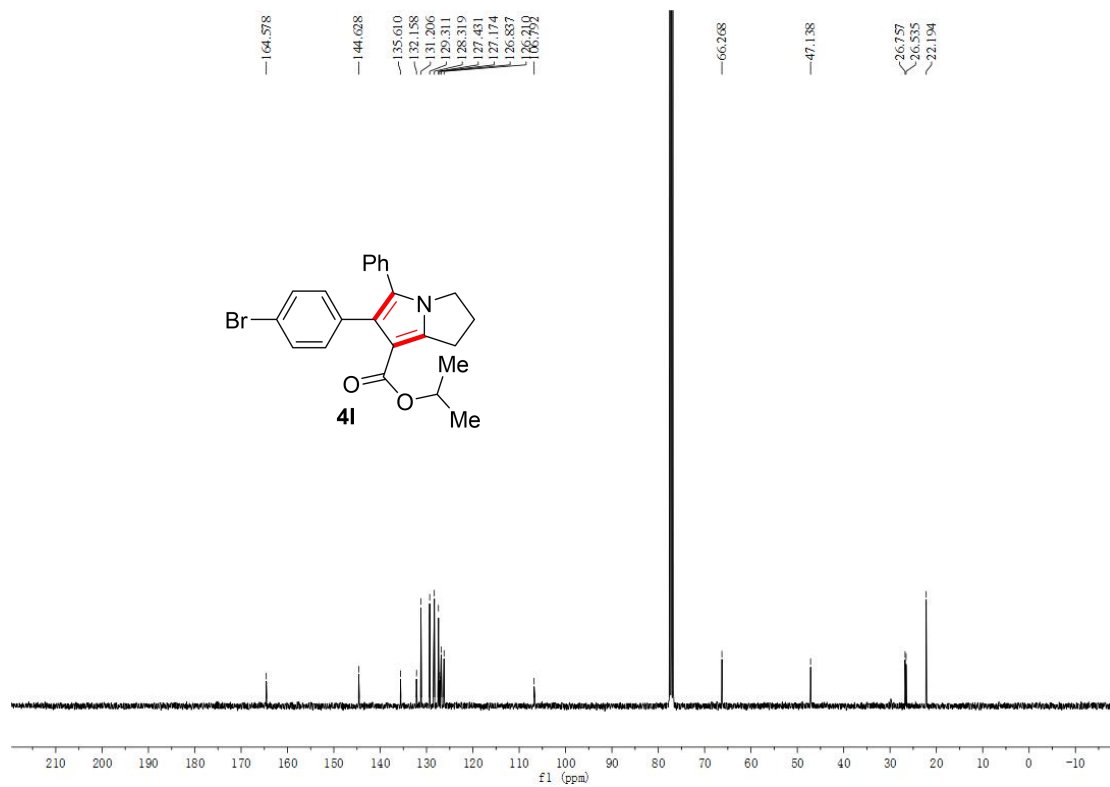

4m,  $^1\text{H}+^{13}\text{C}$  NMR

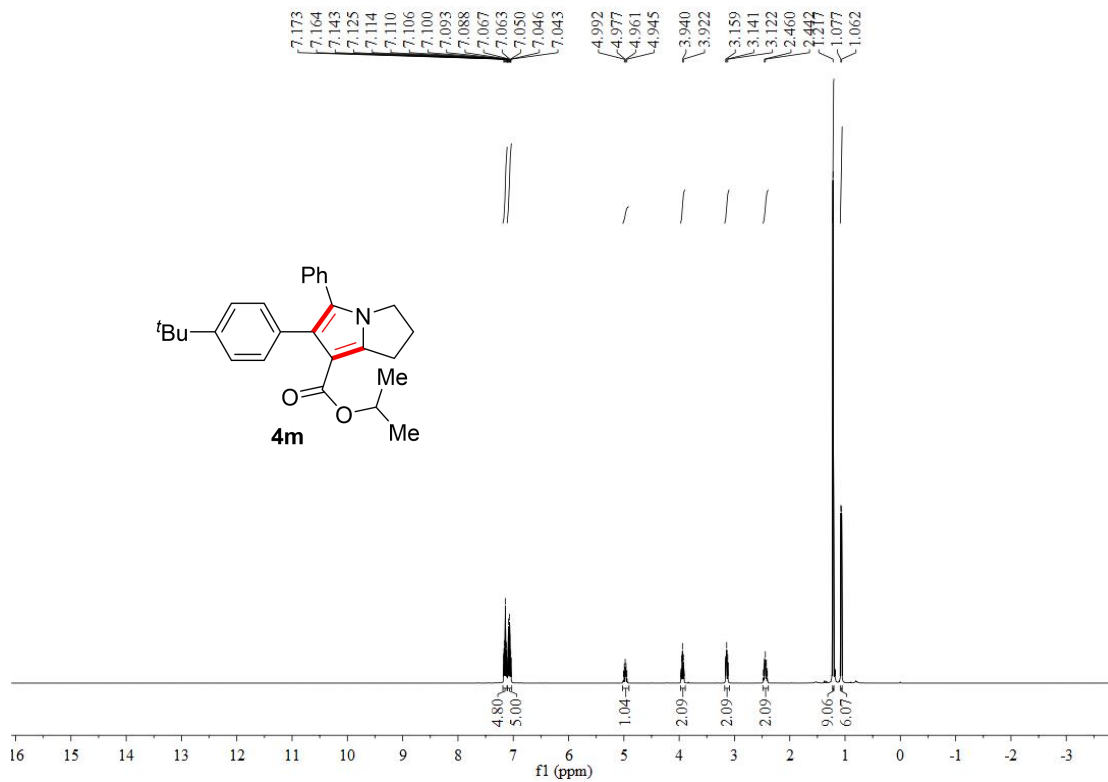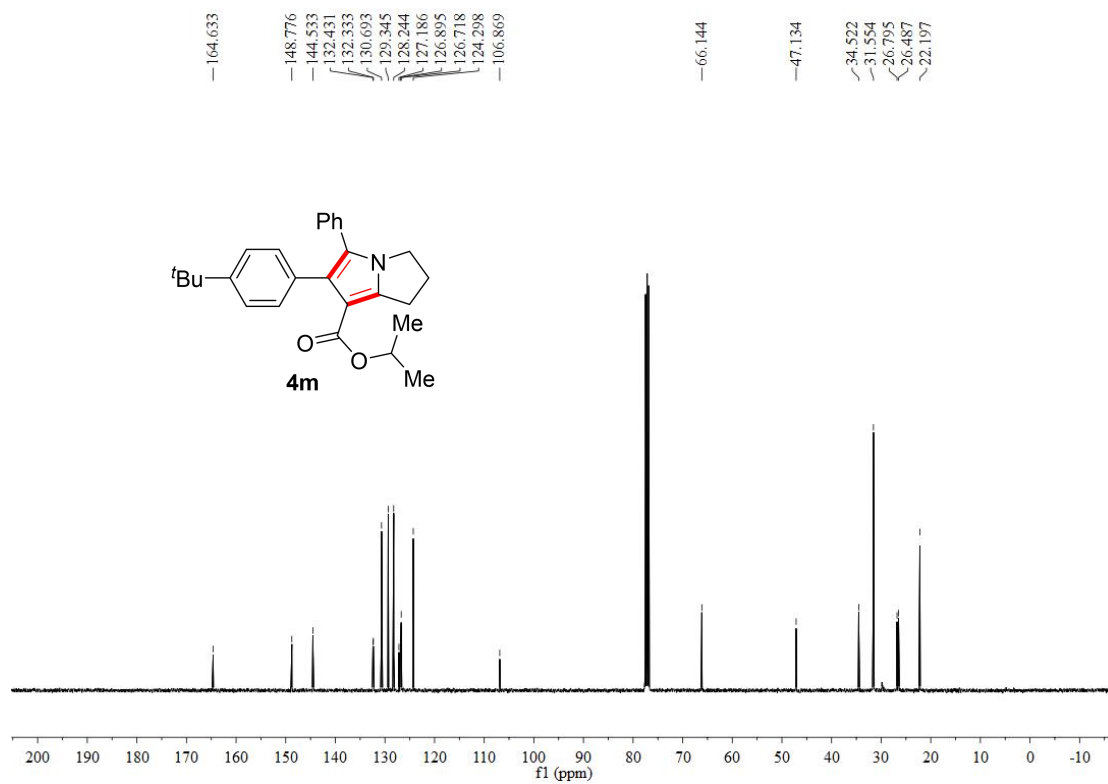

**4n,  $^1\text{H}+^{13}\text{C}+\text{F}^{19}$  NMR**

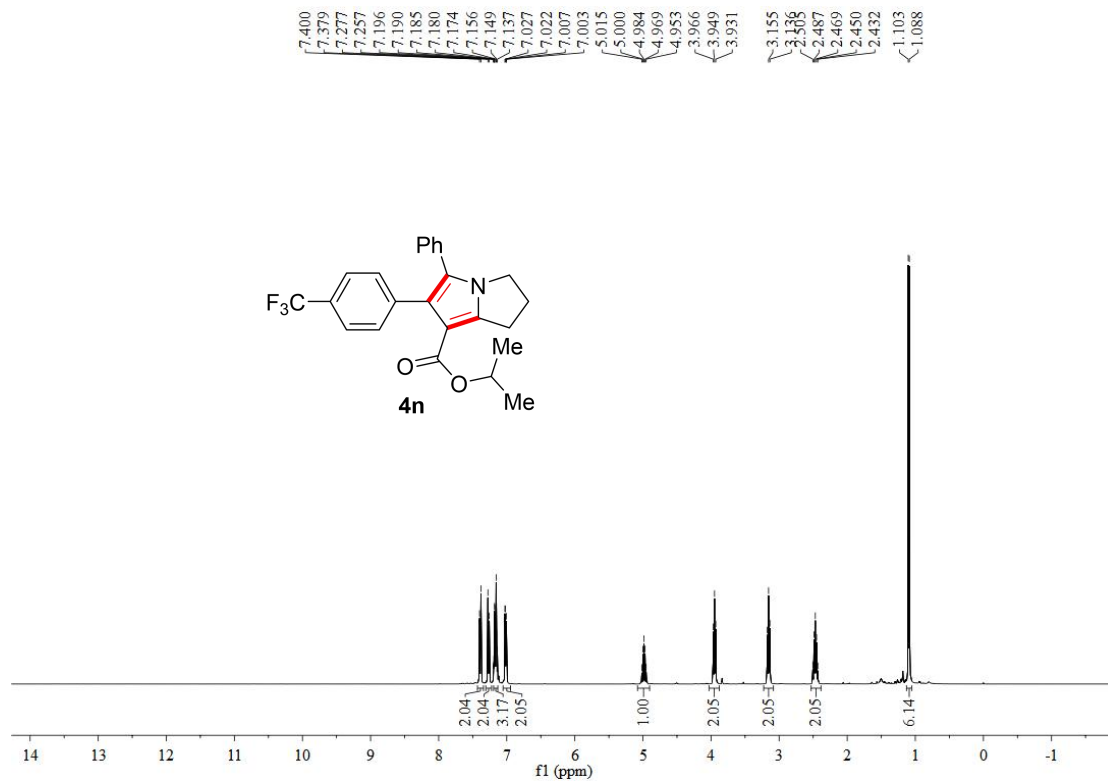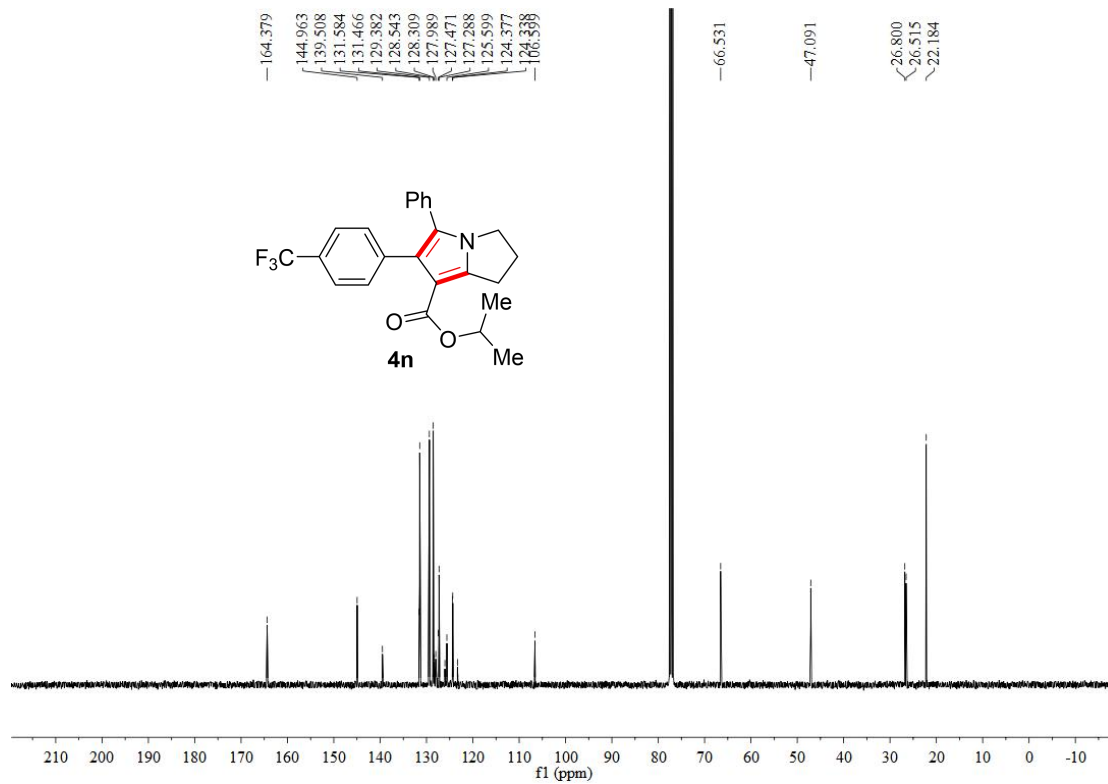

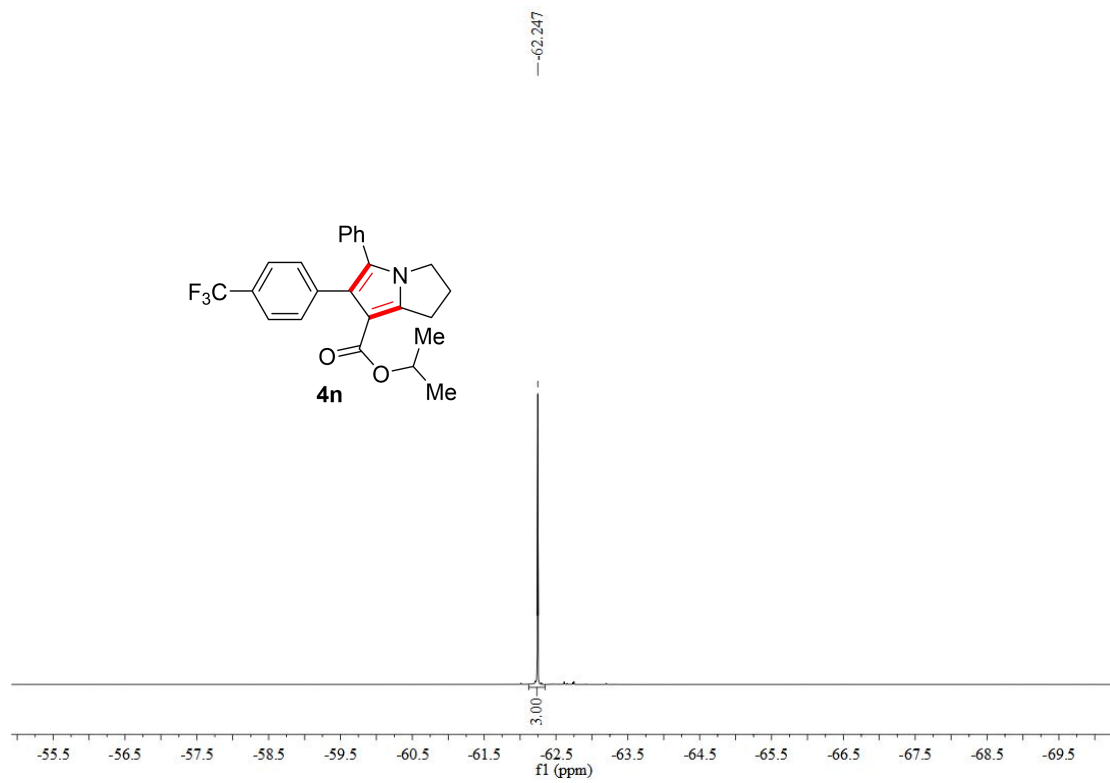

4o, <sup>1</sup>H+<sup>13</sup>C NMR

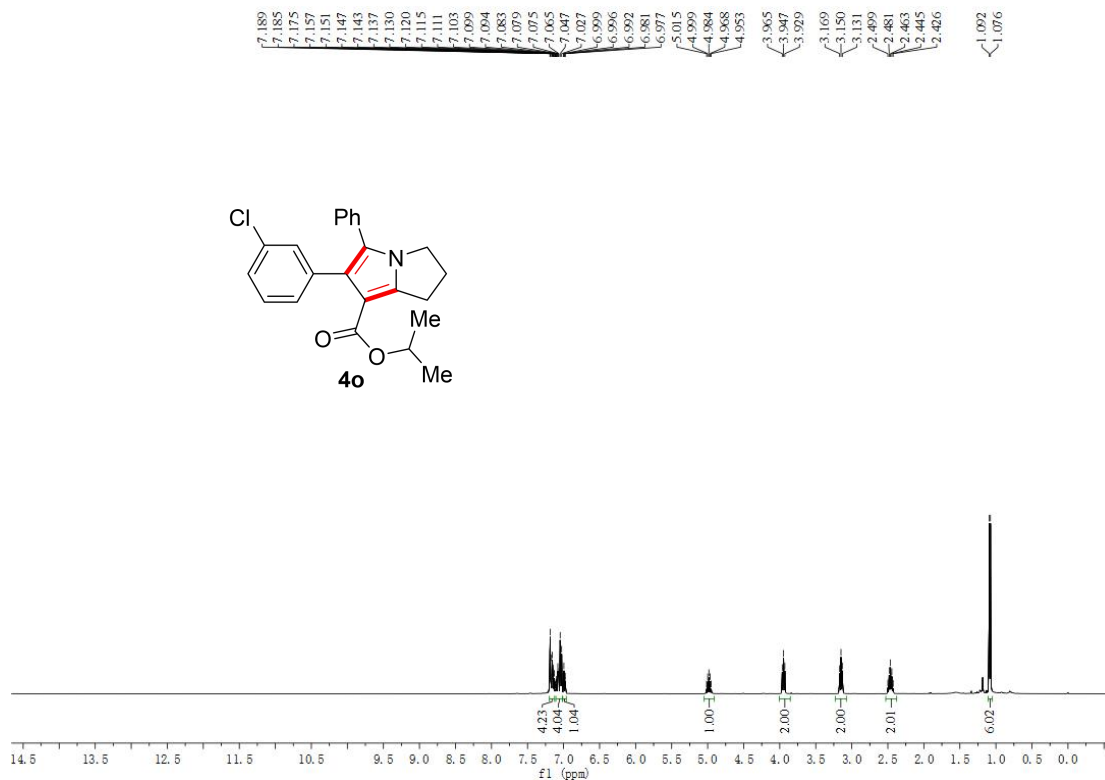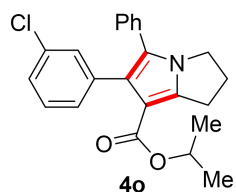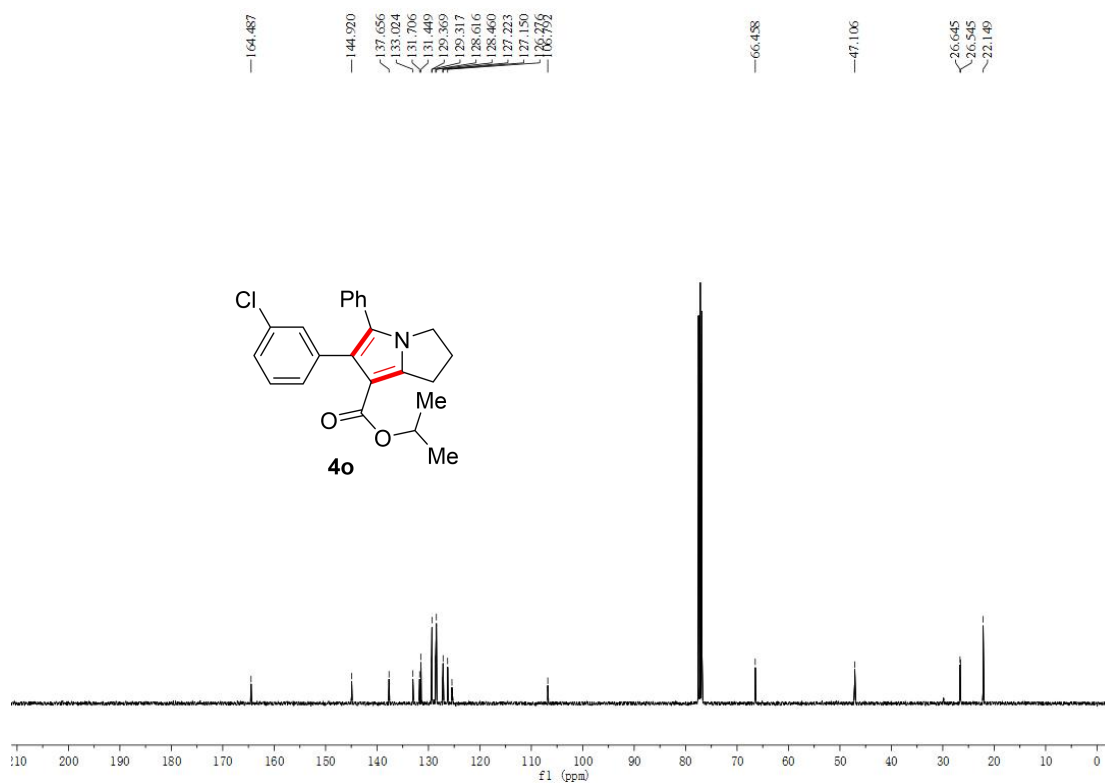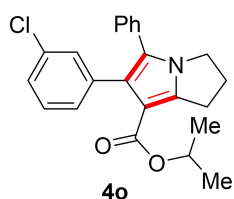

4p,  $^1\text{H}+^{13}\text{C}$  NMR

7.377  
7.376  
7.358  
7.356  
7.240  
7.223  
7.219  
7.204  
7.193  
7.185  
7.181  
7.177  
7.174  
7.168  
7.157  
7.151  
7.145  
7.141  
7.124  
7.118  
7.101  
7.098  
7.082  
7.079  
5.029  
5.013  
4.998  
4.982  
4.967  
4.157  
4.130  
4.105  
3.999  
3.262  
3.243  
3.223  
3.201  
2.983  
2.965  
2.947  
2.928  
1.109  
1.094  
1.085  
1.029

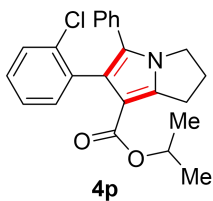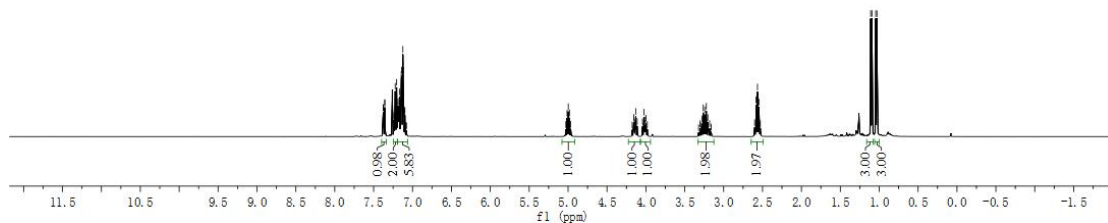

164.456  
144.470  
135.586  
132.724  
131.918  
128.844  
128.557  
128.367  
127.999  
126.912  
66.187  
47.186  
26.666  
26.378  
22.052  
21.909

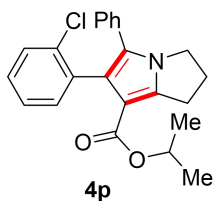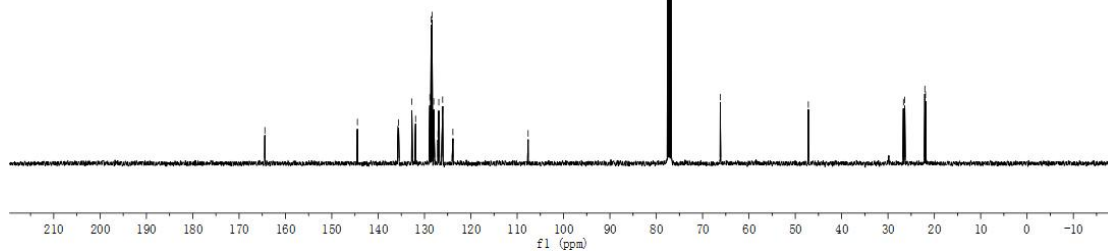

4q,  $^1\text{H}+^{13}\text{C}$  NMR

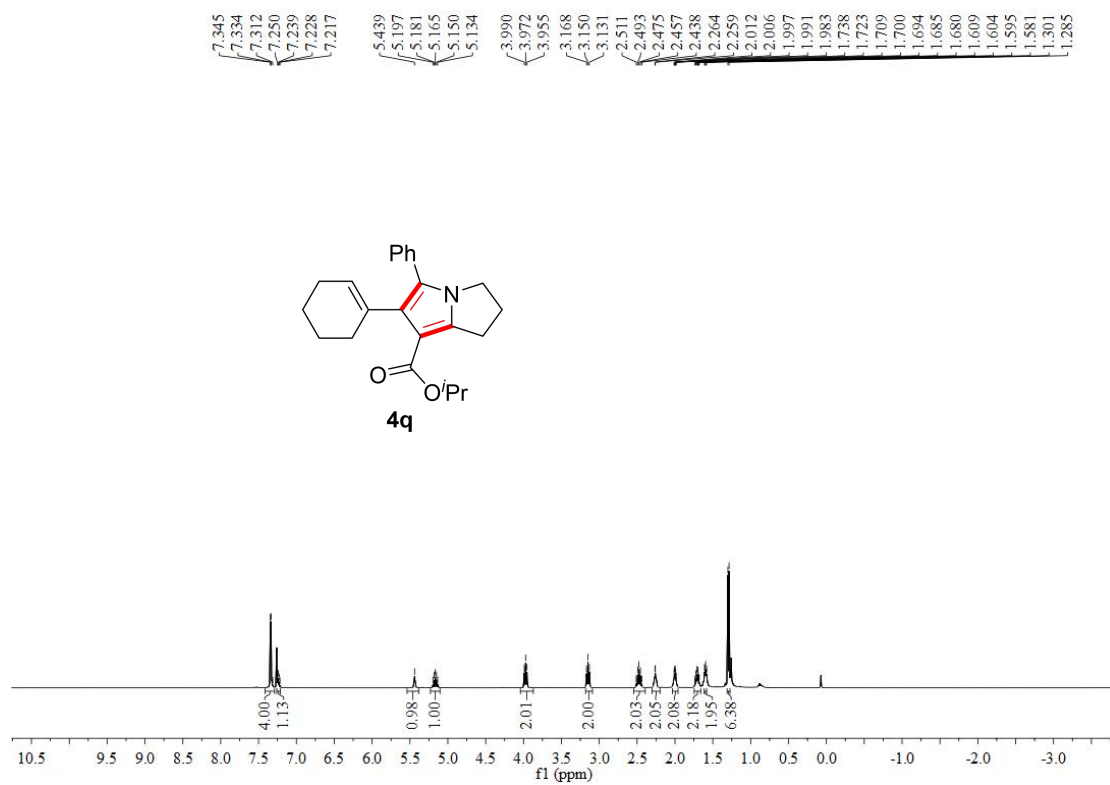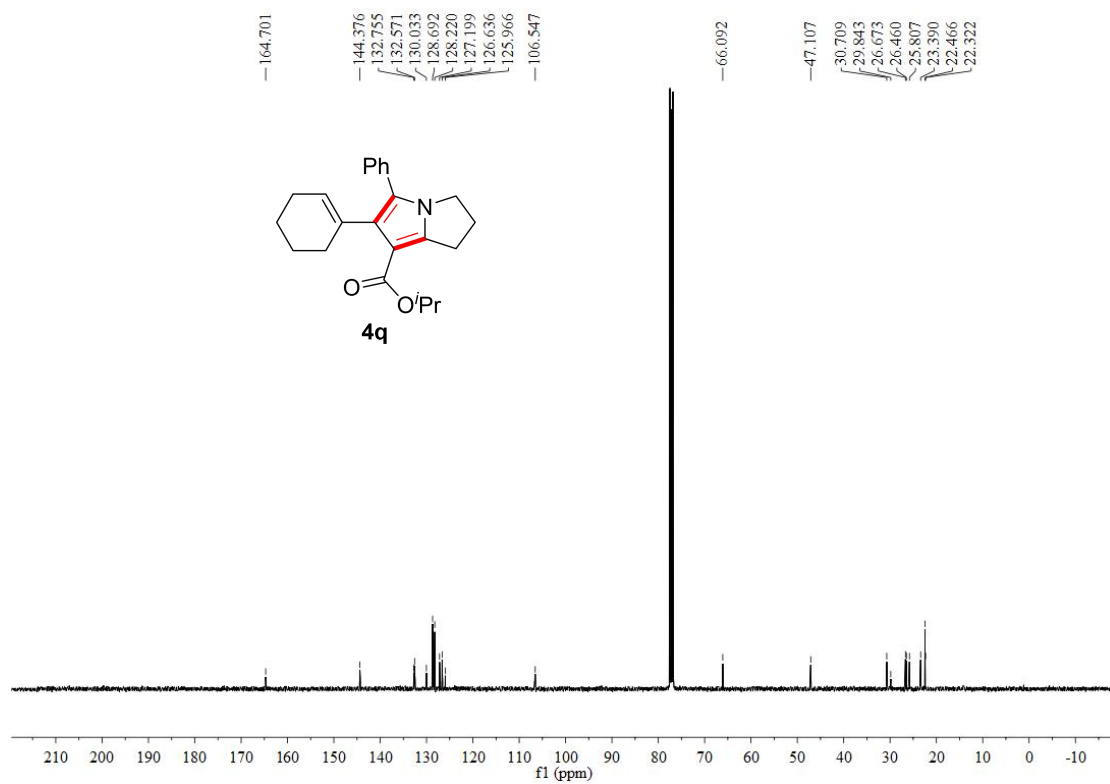



5a, <sup>1</sup>H+<sup>13</sup>C NMR

7.240  
7.234  
7.224  
7.210  
7.214  
7.199  
7.192  
7.186  
7.176  
7.159  
7.154  
7.150  
7.127  
7.123  
7.106  
4.720  
4.709  
4.693  
4.683  
4.666  
4.656  
4.082  
4.073  
4.064  
4.056  
4.039  
4.022  
4.004  
3.995  
3.255  
3.237  
3.223  
3.205  
2.576  
2.558  
2.540  
2.322  
2.099  
2.070  
1.788  
1.782  
1.771  
1.765  
1.748  
1.730  
1.720  
1.687  
1.658  
1.389  
1.382  
1.446  
1.438  
1.430  
1.416  
1.257  
1.144  
1.124  
1.117  
1.110  
1.024  
1.016  
0.992  
0.984  
0.878  
0.862  
0.796  
0.779  
0.691  
0.674

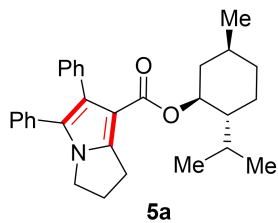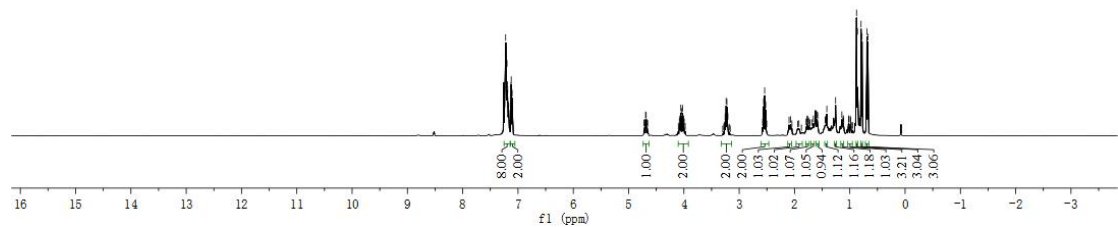

164.612  
144.708  
135.667  
132.135  
131.281  
129.270  
128.301  
127.374  
127.215  
127.002  
126.806  
126.317  
106.821  
72.831  
47.273  
47.140  
41.464  
34.527  
31.503  
26.814  
26.543  
25.990  
23.324  
22.202  
21.132  
16.276

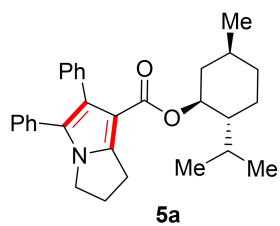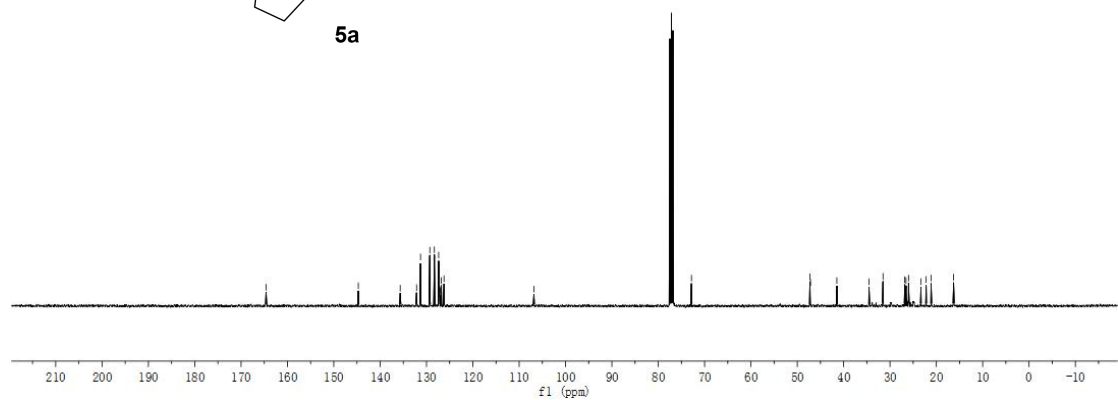

5b, <sup>1</sup>H+<sup>13</sup>C NMR

7.171, 7.166, 7.156, 7.155, 7.145, 7.131, 7.118, 7.114, 7.107, 7.101, 7.092, 7.086, 7.082, 7.048, 7.044, 5.027, 5.020, 5.002, 4.984, 4.104, 4.104, 4.093, 4.077, 4.061, 4.055, 4.038, 4.028, 4.021, 4.011, 3.993, 3.983, 3.966, 3.948, 3.167, 3.149, 3.130, 2.503, 2.484, 2.466, 2.448, 2.430, 1.885, 1.867, 1.849, 1.830, 1.604, 1.524, 1.511, 1.492, 1.478, 1.460, 1.354, 1.338, 1.322, 1.280, 1.262, 1.246, 1.212, 1.201, 1.196, 1.184, 1.067, 1.063, 1.059, 1.048, 1.044, 1.039, 1.034, 1.025, 0.770, 0.754

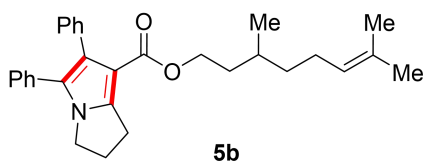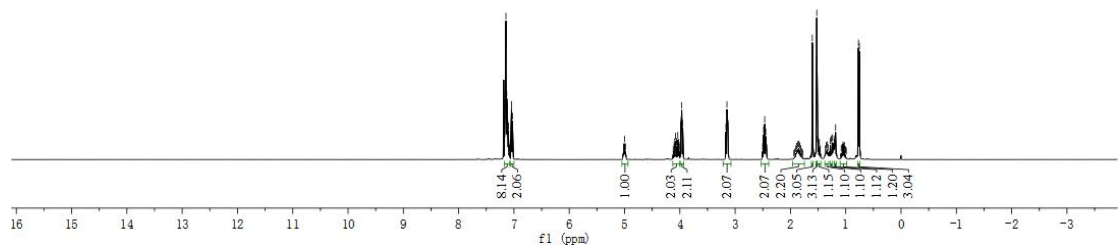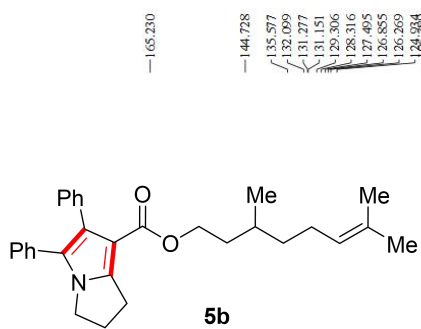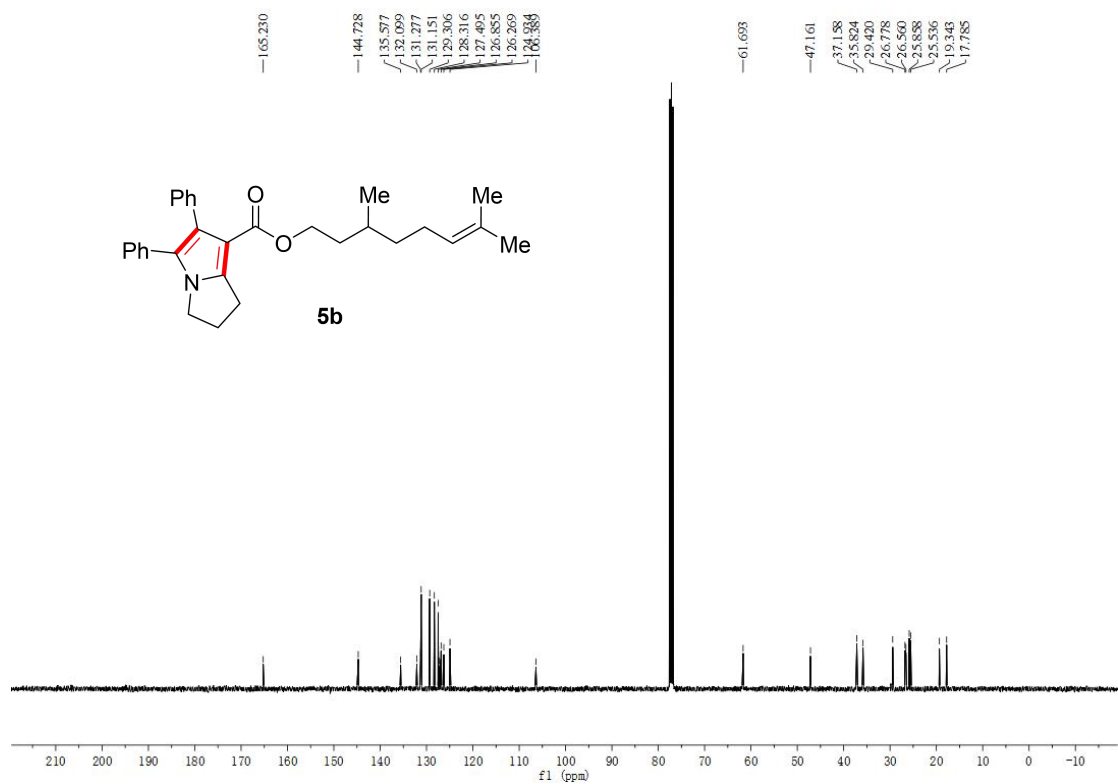

**5c,  $^1\text{H}+^{13}\text{C}$  NMR**

7.170 7.166 7.156 7.150 7.143 7.135 7.131 7.124 7.122 7.118 7.114 7.101 7.092 7.086 7.082 7.050 7.046 7.029 5.214 5.211 5.197 5.194 5.021 4.854 4.535 3.977 3.959 3.942 3.164 3.145 3.127 2.493 2.474 2.456 2.438 2.420 2.035 2.017 1.996 1.980 1.949 1.929 1.916 1.898 1.612 1.565 1.539

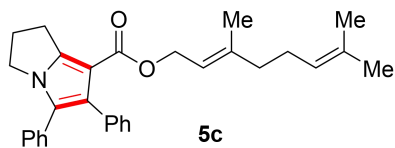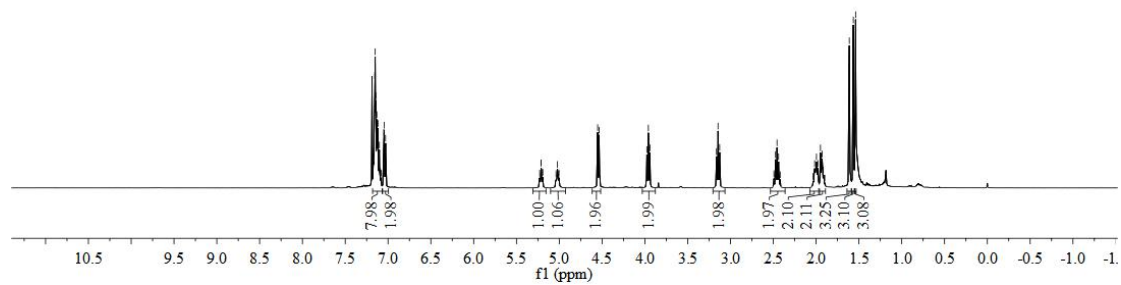

165.076 144.796 140.980 132.178 131.776 131.212 129.349 128.324 127.471 127.265 126.862 126.241 124.126 119.338 106.353 60.279 47.179 39.598 26.789 26.547 26.506 25.819 17.836 16.588

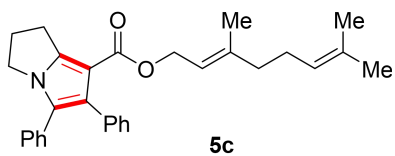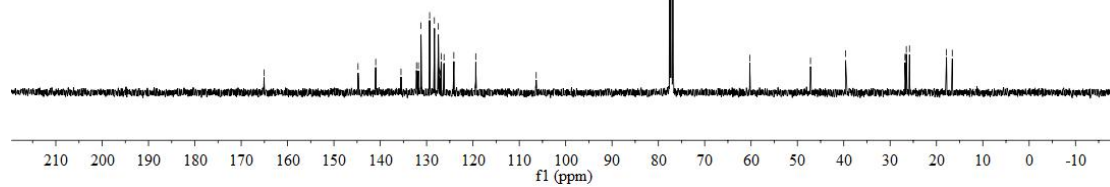

5d <sup>1</sup>H+<sup>13</sup>C NMR

7.244, 7.239, 7.234, 7.229, 7.224, 7.217, 7.208, 7.204, 7.199, 7.195, 7.191, 7.187, 7.180, 7.173, 7.167, 7.164, 7.159, 7.155, 7.124, 7.120, 7.114, 7.107, 7.103, 7.100, 5.298, 5.295, 5.073, 4.608, 4.591, 4.048, 4.030, 4.012, 3.218, 3.199, 2.562, 2.544, 2.526, 2.507, 2.489, 2.058, 2.046, 2.034, 1.726, 1.724, 1.664, 1.583

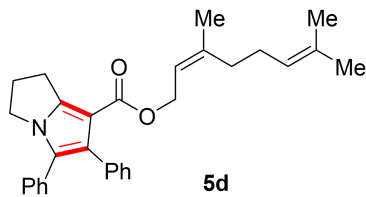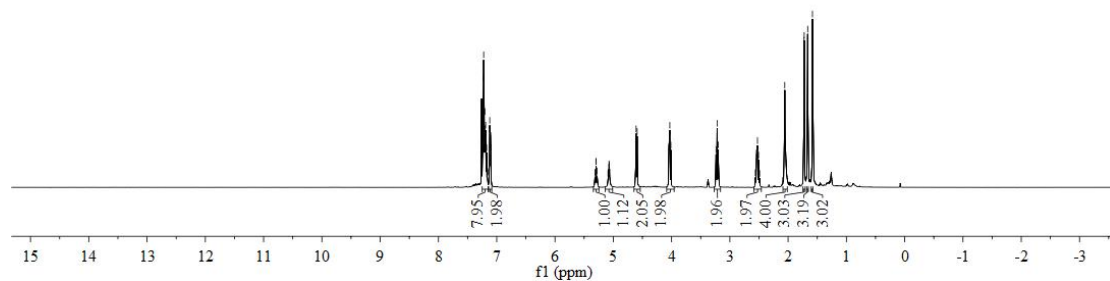

165.011, 144.760, 140.999, 135.454, 132.142, 132.067, 131.199, 129.318, 128.313, 127.465, 127.284, 127.031, 126.839, 126.226, 123.923, 120.337, 106.250, 60.073, 47.170, 32.310, 26.839, 26.781, 26.527, 25.817, 23.564, 17.802

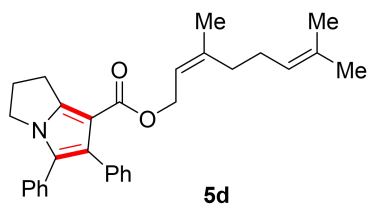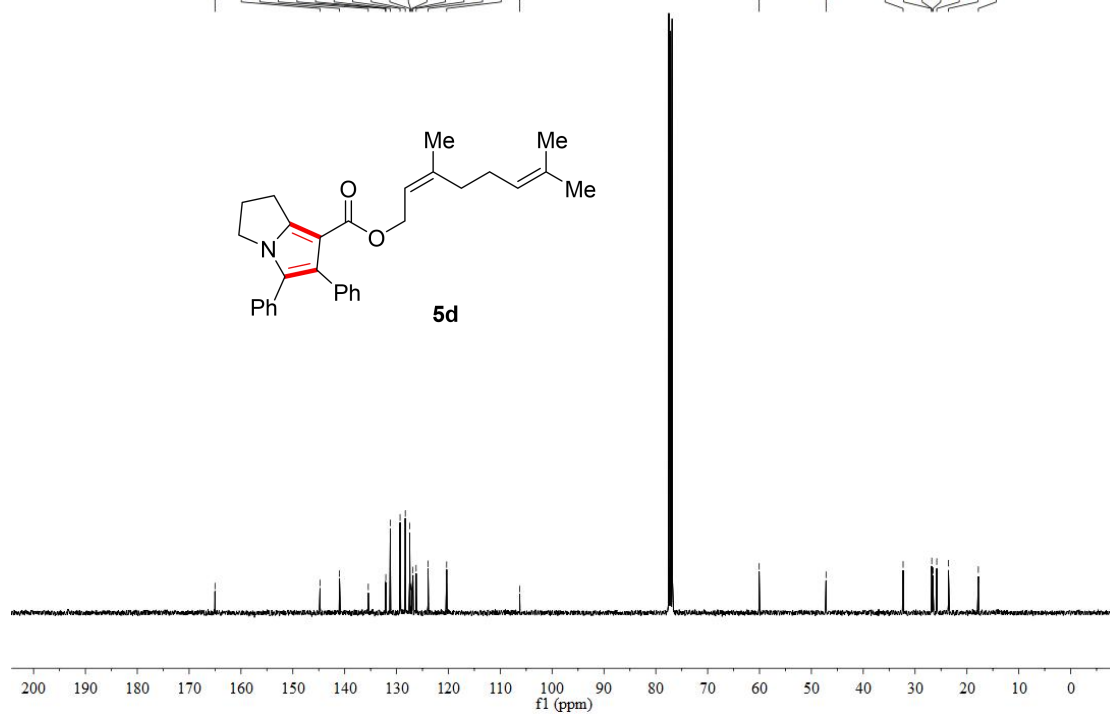

**5e,  $^1\text{H}+^{13}\text{C}$  NMR**

7.243  
7.230  
7.229  
7.222  
7.210  
7.203  
7.201  
7.194  
7.191  
7.187  
7.180  
7.174  
7.164  
7.159  
7.155  
7.120  
7.116  
7.110  
7.103  
7.099  
7.096  
5.590  
5.582  
4.723  
4.720  
4.706  
4.484  
4.060  
4.042  
4.024  
3.254  
3.235  
3.217  
2.582  
2.564  
2.527  
2.509  
2.117  
2.105  
2.090  
2.079  
2.072  
1.939  
1.934  
1.915  
1.909  
1.899  
1.892  
1.785  
1.779  
1.763  
1.736  
1.578  
1.427  
1.418  
1.398  
1.379  
1.368

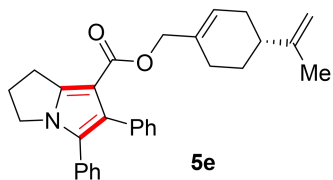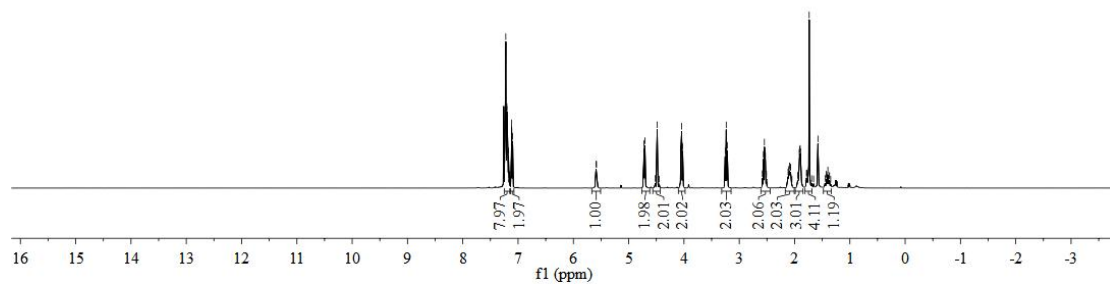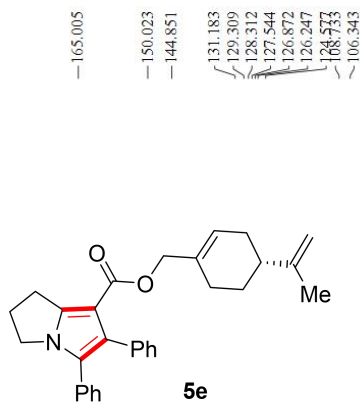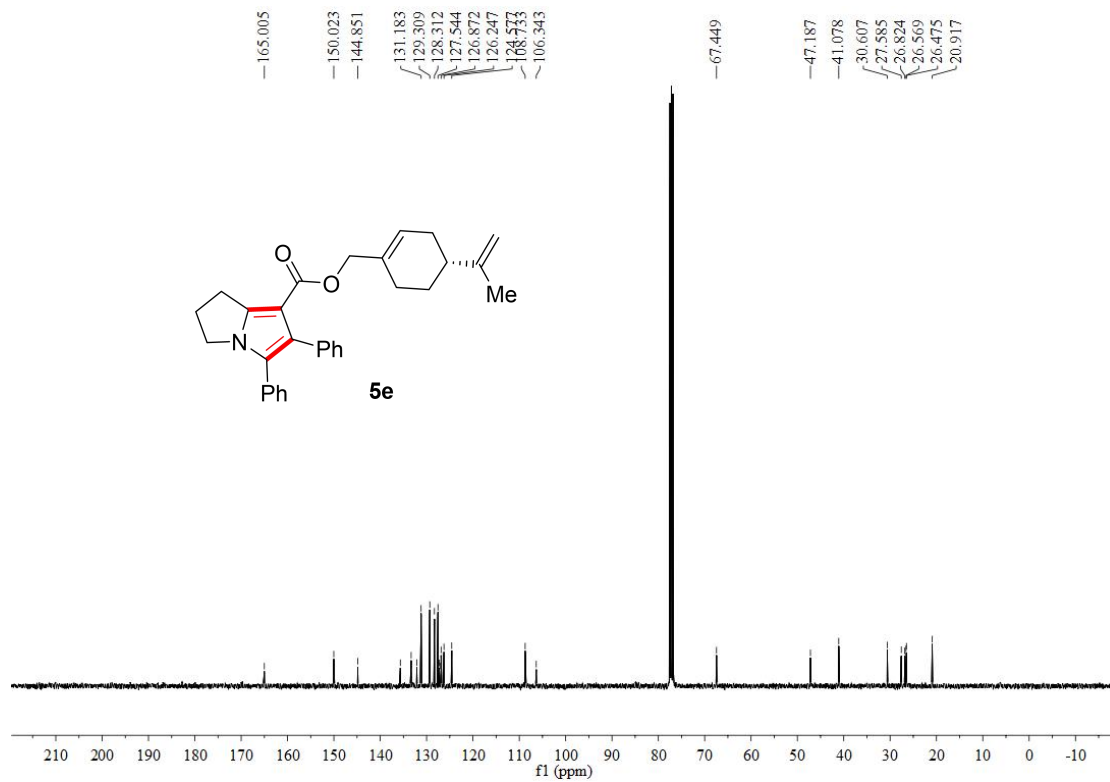

Supplement: d4qo00953c1.pdf [file d4qo00953c1.pdf]
